# Supplementary material for: Changes to bacterial communities and soil metabolites in an apple orchard as a legacy effect of different intercropping plants and soil management practices
Source: Frontiers journal article supplement (doi:10.3389/fmicb.2022.956840), 2022-08-08
Supplement: Data_Sheet_1.xlsx [file Data_Sheet_1.xlsx]

## Sheet: Table S1
SampleID	TOC	ammonium	NitrateN	AP	AK	organic	MBC	MBN
A1R1	1.47	1.04	8.9	0.8	93	4.99	143.81	34.05
A1R2	1.39	0.67	11.15	0.9	88	4.87	159.79	6.19
A1R3	1.05	1	7.42	1	93	4.03	215.72	21.67
A1R4	1.39	0.67	11.15	0.9	88	4.87	159.79	6.19
A1R5	1.05	1	7.42	1	93	4.03	215.72	21.67
A2R1	2.09	0.87	8.23	16.4	63	4.37	191.75	6.19
A2R2	2.78	0.85	8.51	16.1	61	6.26	311.59	12.38
A2R3	2.78	0.9	7.64	16.7	59	5.29	287.62	15.48
A2R4	2.09	0.87	8.23	16.4	63	4.37	191.75	6.19
A2R5	2.78	0.85	8.51	16.1	61	6.26	311.59	12.38
A3R1	0.476	0.6	1.17	2.6	100	2.1	231.69	6.19
A3R2	0.803	0.91	2.93	2.4	102	2.1	119.84	6.19
A3R3	1.04	0.88	1.17	2.2	103	2.09	39.95	3.1
A3R4	0.803	0.91	2.93	2.4	102	2.1	119.84	6.19
A3R5	1.04	0.88	1.17	2.2	103	2.09	39.95	3.1
B1R1	3.01	0.82	6.06	4.7	188	5.89	407.46	27.86
B1R2	2.85	1.09	6.06	4.9	188	5.48	343.55	27.86
B1R3	2.4	1.07	9.39	5.1	178	5.04	351.54	18.57
B1R4	2.85	1.09	6.06	4.9	188	5.48	343.55	27.86
B1R5	2.4	1.07	9.39	5.1	178	5.04	351.54	18.57
B2R1	1.97	1.08	8.09	1.9	65	3.07	191.75	12.38
B2R2	2.05	0.72	10.79	1.5	70	4.61	215.72	6.19
B2R3	1.41	0.76	7.19	1.5	67	2.53	287.62	12.38
B2R4	1.97	1.08	8.09	1.9	65	3.07	191.75	12.38
B2R5	2.05	0.72	10.79	1.5	70	4.61	215.72	6.19
B3R1	3.56	0.91	7.27	27.5	123	7.02	31.96	6.19
B3R2	3.32	1.25	6.98	28.7	128	6.32	31.96	3.1
B3R3	3.45	0.89	6.98	46	118	6.49	39.95	12.38
B3R4	3.32	1.25	6.98	28.7	128	6.32	31.96	3.1
B3R5	3.45	0.89	6.98	46	118	6.49	39.95	12.38
C1R1	9.51	1.21	23.32	242.1	261	17	343.55	12.38
C1R2	9.86	1.58	19.6	231.6	269	18.1	231.69	9.29
C1R3	9.71	1.24	26.35	249.2	269	17.1	367.52	21.67
C1R4	9.51	1.21	23.32	242.1	261	17	343.55	12.38
C1R5	9.86	1.58	19.6	231.6	269	18.1	231.69	9.29
C2R1	2.19	0.98	26.36	15.8	203	4.62	183.76	49.53
C2R2	2.68	0.95	23.33	16.2	198	5.26	231.69	9.29
C2R3	2.41	0.69	23.31	14.2	221	5.07	247.67	9.29
C2R4	2.19	0.98	26.36	15.8	203	4.62	183.76	49.53
C2R5	2.68	0.95	23.33	16.2	198	5.26	231.69	9.29
C3R1	2.18	0.74	1.79	40.2	110	3.99	119.84	15.48
C3R2	2.11	0.56	2.37	41.7	113	4.82	63.92	3.1
C3R3	2.13	0.8	7.77	25.5	113	4.47	55.93	21.67
C3R4	2.18	0.74	1.79	40.2	110	3.99	119.84	15.48
C3R5	2.11	0.56	2.37	41.7	113	4.82	63.92	3.1

## Sheet: Table S2
Core ASVs	Kingdom	Phylum	Class	Order	Family	Genues
ASV_68	Bacteria	Actinobacteriota	Actinobacteria	Micrococcales	Microbacteriaceae	Agromyces
ASV_995	Bacteria	Proteobacteria	Alphaproteobacteria	Rhizobiales	Rhizobiaceae	Allorhizobium-Neorhizobium-Pararhizobium-Rhizobium
ASV_270	Bacteria	Proteobacteria	Alphaproteobacteria	Sphingomonadales	Sphingomonadaceae	Altererythrobacter
ASV_182	Bacteria	Chloroflexi	Anaerolineae	Anaerolineales	Anaerolineaceae	Anaerolineaceae_uncultured
ASV_121	Bacteria	Acidobacteriota	Blastocatellia	Blastocatellales	Blastocatellaceae	Aridibacter
ASV_3	Bacteria	Actinobacteriota	Actinobacteria	Micrococcales	Micrococcaceae	Arthrobacter
ASV_93	Bacteria	Firmicutes	Bacilli	Bacillales	Bacillaceae	Bacillus
ASV_587	Bacteria	Firmicutes	Bacilli	Bacillales	Bacillaceae	Bacillus
ASV_17	Bacteria	Firmicutes	Bacilli	Bacillales	Bacillaceae	Bacillus
ASV_129	Bacteria	Proteobacteria	Alphaproteobacteria	Rhizobiales	Beijerinckiaceae	Beijerinckiaceae_uncultured
ASV_259	Bacteria	Acidobacteriota	Blastocatellia	Blastocatellales	Blastocatellaceae	Blastocatella
ASV_6	Bacteria	Acidobacteriota	Blastocatellia	Blastocatellales	Blastocatellaceae	Blastocatellaceae_uncultured
ASV_75	Bacteria	Proteobacteria	Alphaproteobacteria	Rhizobiales	Xanthobacteraceae	Bradyrhizobium
ASV_355	Bacteria	Acidobacteriota	Acidobacteriae	Bryobacterales	Bryobacteraceae	Bryobacter
ASV_378	Bacteria	Acidobacteriota	Acidobacteriae	Bryobacterales	Bryobacteraceae	Bryobacter
ASV_190	Bacteria	Proteobacteria	Gammaproteobacteria	Burkholderiales	Comamonadaceae	Caenimonas
ASV_19	Bacteria	Bacteroidota	Bacteroidia	Chitinophagales	Chitinophagaceae	Chitinophagaceae_uncultured
ASV_50	Bacteria	Bacteroidota	Bacteroidia	Chitinophagales	Chitinophagaceae	Chitinophagaceae_uncultured
ASV_107	Bacteria	Proteobacteria	Gammaproteobacteria	Burkholderiales	Comamonadaceae	Comamonadaceae_uncultured
ASV_104	Bacteria	Myxococcota	Myxococcia	Myxococcales	Myxococcaceae	Cystobacter
ASV_1456	Bacteria	Myxococcota	Myxococcia	Myxococcales	Myxococcaceae	Cystobacter
ASV_180	Bacteria	Proteobacteria	Alphaproteobacteria	Rhizobiales	Devosiaceae	Devosia
ASV_90	Bacteria	Proteobacteria	Alphaproteobacteria	Rhizobiales	Devosiaceae	Devosia
ASV_216	Bacteria	Proteobacteria	Alphaproteobacteria	Rhizobiales	Devosiaceae	Devosiaceae_uncultured
ASV_652	Bacteria	Firmicutes	Bacilli	Bacillales	Planococcaceae	Domibacillus
ASV_73	Bacteria	Proteobacteria	Alphaproteobacteria	Dongiales	Dongiaceae	Dongia
ASV_9	Bacteria	Proteobacteria	Gammaproteobacteria	Burkholderiales	Nitrosomonadaceae	Ellin6067
ASV_704	Bacteria	Proteobacteria	Gammaproteobacteria	Burkholderiales	Nitrosomonadaceae	Ellin6067
ASV_10	Bacteria	Proteobacteria	Alphaproteobacteria	Rhizobiales	Rhizobiaceae	Ensifer
ASV_117	Bacteria	Bacteroidota	Bacteroidia	Chitinophagales	Chitinophagaceae	Ferruginibacter
ASV_59	Bacteria	Bacteroidota	Bacteroidia	Chitinophagales	Chitinophagaceae	Flavisolibacter
ASV_238	Bacteria	Bacteroidota	Bacteroidia	Chitinophagales	Chitinophagaceae	Flavisolibacter
ASV_440	Bacteria	Bacteroidota	Bacteroidia	Chitinophagales	Chitinophagaceae	Flavitalea
ASV_487	Bacteria	Bacteroidota	Bacteroidia	Chitinophagales	Chitinophagaceae	Flavitalea
ASV_331	Bacteria	Actinobacteriota	Thermoleophilia	Gaiellales	Gaiellaceae	Gaiella
ASV_176	Bacteria	Gemmatimonadota	Gemmatimonadetes	Gemmatimonadales	Gemmatimonadaceae	Gemmatimonadaceae_uncultured
ASV_467	Bacteria	Myxococcota	Polyangia	Haliangiales	Haliangiaceae	Haliangium
ASV_23	Bacteria	Proteobacteria	Alphaproteobacteria	Rhizobiales	Hyphomicrobiaceae	Hyphomicrobium
ASV_56	Bacteria	Proteobacteria	Gammaproteobacteria	Xanthomonadales	Xanthomonadaceae	Lysobacter
ASV_144	Bacteria	Proteobacteria	Gammaproteobacteria	Burkholderiales	Oxalobacteraceae	Massilia
ASV_706	Bacteria	Proteobacteria	Gammaproteobacteria	Burkholderiales	Oxalobacteraceae	Massilia
ASV_850	Bacteria	Proteobacteria	Gammaproteobacteria	Burkholderiales	Oxalobacteraceae	Massilia
ASV_225	Bacteria	Proteobacteria	Alphaproteobacteria	Rhizobiales	Rhizobiaceae	Mesorhizobium
ASV_5	Bacteria	Proteobacteria	Alphaproteobacteria	Rhizobiales	Methyloligellaceae	Methyloligellaceae_uncultured
ASV_337	Bacteria	Proteobacteria	Alphaproteobacteria	Rhizobiales	Methyloligellaceae	Methyloligellaceae_uncultured
ASV_274	Bacteria	Actinobacteriota	Actinobacteria	Micrococcales	Microbacteriaceae	Microbacterium
ASV_192	Bacteria	Bacteroidota	Bacteroidia	Cytophagales	Microscillaceae	Microscillaceae_uncultured
ASV_69	Bacteria	Proteobacteria	Alphaproteobacteria	Rhizobiales	Beijerinckiaceae	Microvirga
ASV_508	Bacteria	Proteobacteria	Alphaproteobacteria	Rhizobiales	Beijerinckiaceae	Microvirga
ASV_478	Bacteria	Proteobacteria	Alphaproteobacteria	Rhizobiales	Beijerinckiaceae	Microvirga
ASV_8	Bacteria	Proteobacteria	Gammaproteobacteria	Burkholderiales	Nitrosomonadaceae	MND1
ASV_212	Bacteria	Proteobacteria	Gammaproteobacteria	Burkholderiales	Nitrosomonadaceae	MND1
ASV_94	Bacteria	Bacteroidota	Bacteroidia	Chitinophagales	Chitinophagaceae	Niastella
ASV_40	Bacteria	Bacteroidota	Bacteroidia	Chitinophagales	Chitinophagaceae	Niastella
ASV_286	Bacteria	Bacteroidota	Bacteroidia	Chitinophagales	Chitinophagaceae	Niastella
ASV_815	Bacteria	Bacteroidota	Bacteroidia	Chitinophagales	Chitinophagaceae	Niastella
ASV_54	Bacteria	Nitrospirota	Nitrospiria	Nitrospirales	Nitrospiraceae	Nitrospira
ASV_185	Bacteria	Nitrospirota	Nitrospiria	Nitrospirales	Nitrospiraceae	Nitrospira
ASV_146	Bacteria	Proteobacteria	Alphaproteobacteria	Rhizobiales	Rhizobiales_Incertae_Sedis	Nordella
ASV_22	Bacteria	Proteobacteria	Alphaproteobacteria	Rhizobiales	Rhizobiales_Incertae_Sedis	Nordella
ASV_262	Bacteria	Proteobacteria	Gammaproteobacteria	Burkholderiales	Oxalobacteraceae	Noviherbaspirillum
ASV_1294	Bacteria	Myxococcota	Polyangia	Polyangiales	Polyangiaceae	Pajaroellobacter
ASV_138	Bacteria	Proteobacteria	Alphaproteobacteria	Rhizobiales	Hyphomicrobiaceae	Pedomicrobium
ASV_263	Bacteria	Proteobacteria	Alphaproteobacteria	Caulobacterales	Caulobacteraceae	Phenylobacterium
ASV_468	Bacteria	Planctomycetota	Planctomycetes	Pirellulales	Pirellulaceae	Pirellula
ASV_607	Bacteria	Fibrobacterota	Fibrobacteria	Fibrobacterales	Fibrobacteraceae	possible_genus_04
ASV_215	Bacteria	Proteobacteria	Alphaproteobacteria	Rhizobiales	Rhizobiaceae	Pseudaminobacter
ASV_459	Bacteria	Bacteroidota	Bacteroidia	Chitinophagales	Chitinophagaceae	Pseudoflavitalea
ASV_119	Bacteria	Proteobacteria	Alphaproteobacteria	Rhizobiales	Xanthobacteraceae	Pseudolabrys
ASV_157	Bacteria	Proteobacteria	Alphaproteobacteria	Rhizobiales	Xanthobacteraceae	Pseudorhodoplanes
ASV_27	Bacteria	Proteobacteria	Gammaproteobacteria	Xanthomonadales	Xanthomonadaceae	Pseudoxanthomonas
ASV_221	Bacteria	Proteobacteria	Gammaproteobacteria	Burkholderiales	Comamonadaceae	Ramlibacter
ASV_16	Bacteria	Acidobacteriota	Blastocatellia	Pyrinomonadales	Pyrinomonadaceae	RB41
ASV_154	Bacteria	Acidobacteriota	Blastocatellia	Pyrinomonadales	Pyrinomonadaceae	RB41
ASV_14	Bacteria	Acidobacteriota	Blastocatellia	Pyrinomonadales	Pyrinomonadaceae	RB41
ASV_128	Bacteria	Acidobacteriota	Blastocatellia	Pyrinomonadales	Pyrinomonadaceae	RB41
ASV_91	Bacteria	Proteobacteria	Alphaproteobacteria	Reyranellales	Reyranellaceae	Reyranella
ASV_399	Bacteria	Proteobacteria	Gammaproteobacteria	Burkholderiales	Comamonadaceae	Rhizobacter
ASV_853	Bacteria	Planctomycetota	Planctomycetes	Planctomycetales	Rubinisphaeraceae	SH-PL14
ASV_441	Bacteria	Proteobacteria	Alphaproteobacteria	Azospirillales	Azospirillaceae	Skermanella
ASV_651	Bacteria	Proteobacteria	Alphaproteobacteria	Azospirillales	Azospirillaceae	Skermanella
ASV_1190	Bacteria	Actinobacteriota	Thermoleophilia	Solirubrobacterales	Solirubrobacteraceae	Solirubrobacter
ASV_273	Bacteria	Proteobacteria	Alphaproteobacteria	Sphingomonadales	Sphingomonadaceae	Sphingomonas
ASV_1163	Bacteria	Proteobacteria	Alphaproteobacteria	Sphingomonadales	Sphingomonadaceae	Sphingomonas
ASV_195	Bacteria	Proteobacteria	Gammaproteobacteria	Steroidobacterales	Steroidobacteraceae	Steroidobacter
ASV_449	Bacteria	Proteobacteria	Gammaproteobacteria	Steroidobacterales	Steroidobacteraceae	Steroidobacter
ASV_354	Bacteria	Acidobacteriota	Thermoanaerobaculia	Thermoanaerobaculales	Thermoanaerobaculaceae	Subgroup_10
ASV_386	Bacteria	Acidobacteriota	Thermoanaerobaculia	Thermoanaerobaculales	Thermoanaerobaculaceae	Subgroup_10
ASV_683	Bacteria	Acidobacteriota	Thermoanaerobaculia	Thermoanaerobaculales	Thermoanaerobaculaceae	Subgroup_10
ASV_18	Bacteria	Bacteroidota	Bacteroidia	Chitinophagales	Chitinophagaceae	Terrimonas
ASV_36	Bacteria	Acidobacteriota	Vicinamibacteria	Vicinamibacterales	Vicinamibacteraceae	Unassigned
ASV_25	Bacteria	Acidobacteriota	Vicinamibacteria	Vicinamibacterales	Vicinamibacteraceae	Unassigned
ASV_100	Bacteria	Acidobacteriota	Vicinamibacteria	Vicinamibacterales	Vicinamibacteraceae	Unassigned
ASV_60	Bacteria	Acidobacteriota	Vicinamibacteria	Vicinamibacterales	Vicinamibacterales_uncultured	Unassigned
ASV_4	Bacteria	Acidobacteriota	Vicinamibacteria	Vicinamibacterales	Vicinamibacteraceae	Unassigned
ASV_39	Bacteria	Acidobacteriota	Vicinamibacteria	Vicinamibacterales	Vicinamibacteraceae	Unassigned
ASV_513	Bacteria	Proteobacteria	Gammaproteobacteria	Burkholderiales	TRA3-20	Unassigned
ASV_99	Bacteria	Acidobacteriota	Vicinamibacteria	Vicinamibacterales	Vicinamibacterales_uncultured	Unassigned
ASV_168	Bacteria	Acidobacteriota	Vicinamibacteria	Vicinamibacterales	Vicinamibacterales_uncultured	Unassigned
ASV_333	Bacteria	Acidobacteriota	Holophagae	Subgroup_7	Unassigned	Unassigned
ASV_266	Bacteria	Acidobacteriota	Vicinamibacteria	Vicinamibacterales	Vicinamibacteraceae	Unassigned
ASV_81	Bacteria	Actinobacteriota	Acidimicrobiia	IMCC26256	Unassigned	Unassigned
ASV_161	Bacteria	Acidobacteriota	Vicinamibacteria	Vicinamibacterales	Vicinamibacterales_uncultured	Unassigned
ASV_45	Bacteria	Acidobacteriota	Holophagae	Subgroup_7	Unassigned	Unassigned
ASV_953	Bacteria	Acidobacteriota	Vicinamibacteria	Vicinamibacterales	Vicinamibacteraceae	Unassigned
ASV_165	Bacteria	Acidobacteriota	Holophagae	Subgroup_7	Unassigned	Unassigned
ASV_178	Bacteria	Proteobacteria	Gammaproteobacteria	Burkholderiales	TRA3-20	Unassigned
ASV_160	Bacteria	Acidobacteriota	Vicinamibacteria	Vicinamibacterales	Vicinamibacterales_uncultured	Unassigned
ASV_51	Bacteria	Acidobacteriota	Holophagae	Subgroup_7	Unassigned	Unassigned
ASV_391	Bacteria	Proteobacteria	Gammaproteobacteria	Burkholderiales	TRA3-20	Unassigned
ASV_421	Bacteria	Acidobacteriota	Vicinamibacteria	Vicinamibacterales	Vicinamibacterales_uncultured	Unassigned
ASV_241	Bacteria	Acidobacteriota	Vicinamibacteria	Vicinamibacterales	Vicinamibacteraceae	Unassigned
ASV_63	Bacteria	Acidobacteriota	Vicinamibacteria	Vicinamibacterales	Vicinamibacteraceae	Unassigned
ASV_66	Bacteria	Acidobacteriota	Vicinamibacteria	Vicinamibacterales	Vicinamibacteraceae	Unassigned
ASV_325	Bacteria	Acidobacteriota	Vicinamibacteria	Vicinamibacterales	Vicinamibacterales_uncultured	Unassigned
ASV_796	Bacteria	Acidobacteriota	Vicinamibacteria	Vicinamibacterales	Vicinamibacterales_uncultured	Unassigned
ASV_132	Bacteria	Acidobacteriota	Vicinamibacteria	Vicinamibacterales	Vicinamibacteraceae	Unassigned
ASV_563	Bacteria	Acidobacteriota	Vicinamibacteria	Vicinamibacterales	Vicinamibacteraceae	Unassigned
ASV_249	Bacteria	Planctomycetota	Phycisphaerae	Tepidisphaerales	WD2101_soil_group	Unassigned
ASV_322	Bacteria	Acidobacteriota	Vicinamibacteria	Vicinamibacterales	Vicinamibacteraceae	Unassigned
ASV_917	Bacteria	Planctomycetota	Phycisphaerae	Tepidisphaerales	WD2101_soil_group	Unassigned
ASV_531	Bacteria	Proteobacteria	Alphaproteobacteria	Rhizobiales	Rhizobiales_uncultured	Unassigned
ASV_752	Bacteria	Planctomycetota	Phycisphaerae	Tepidisphaerales	WD2101_soil_group	Unassigned
ASV_164	Bacteria	Acidobacteriota	Holophagae	Subgroup_7	Unassigned	Unassigned
ASV_142	Bacteria	Proteobacteria	Gammaproteobacteria	Burkholderiales	TRA3-20	Unassigned
ASV_116	Bacteria	Acidobacteriota	Vicinamibacteria	Vicinamibacterales	Vicinamibacterales_uncultured	Unassigned
ASV_276	Bacteria	Acidobacteriota	Vicinamibacteria	Vicinamibacterales	Vicinamibacterales_uncultured	Unassigned
ASV_226	Bacteria	Proteobacteria	Gammaproteobacteria	Burkholderiales	SC-I-84	Unassigned
ASV_1464	Bacteria	Acidobacteriota	Vicinamibacteria	Subgroup_17	Unassigned	Unassigned
ASV_32	Bacteria	Acidobacteriota	Holophagae	Subgroup_7	Unassigned	Unassigned
ASV_237	Bacteria	Acidobacteriota	Vicinamibacteria	Vicinamibacterales	Vicinamibacteraceae	Vicinamibacter
ASV_118	Bacteria	Acidobacteriota	Vicinamibacteria	Vicinamibacterales	Vicinamibacteraceae	Vicinamibacteraceae_uncultured
ASV_186	Bacteria	Proteobacteria	Alphaproteobacteria	Rhizobiales	Xanthobacteraceae	Xanthobacteraceae_uncultured
ASV_197	Bacteria	Proteobacteria	Alphaproteobacteria	Rhizobiales	Xanthobacteraceae	Xanthobacteraceae_uncultured
ASV_597	Bacteria	Proteobacteria	Alphaproteobacteria	Rhizobiales	Xanthobacteraceae	Xanthobacteraceae_uncultured
ASV_72	Bacteria	Proteobacteria	Gammaproteobacteria	Burkholderiales	Comamonadaceae	Xylophilus

## Sheet: Table S3
Comparison	P value	Marke
Apple VS Glycyrrhiza	0.00059994	***
Apple VS Sandy waste soil	9.999e-05	***
Apple VS Nature glass	0.00019998	***
Apple VS Pepper	0.00569943	**
Glycyrrhiza VS Sandy waste soil	0.00019998	***
Glycyrrhiza VS Nature glass	0.00839916	**
Glycyrrhiza VS Pepper	0.00809919	**
Sandy waste soil VS Nature glass	0.00039996	***
Sandy waste soil VS Pepper	0.00029997	***
Nature_glass VS Pepper	0.00919908	**

## Sheet: Table S4
Apple VS Pepper
ID	log2FC	log2CPM	PValue	FDR	level	Mean Apple	Mean Pepper
OTU_1391	-3.907	10.848	1.95396e-13	3.23185e-10	Depleted	0.028	0.444
OTU_343	-4.541	9.794	2.3063e-10	1.90731e-07	Depleted	0.004	0.148
OTU_111	-3.205	10.957	1.07308e-08	4.88728e-06	Depleted	0.051	0.469
OTU_135	-3.012	10.732	1.18193e-08	4.88728e-06	Depleted	0.042	0.375
OTU_62	-2.503	11.867	2.00199e-08	6.62259e-06	Depleted	0.156	0.824
OTU_366	-3.375	11.025	7.74505e-08	2.13505e-05	Depleted	0.049	0.357
OTU_95	-2.523	11.717	1.02022e-07	2.41062e-05	Depleted	0.135	0.798
OTU_1299	5.507	10.613	3.30756e-07	6.14236e-05	Enriched	0.145	0
OTU_413	-3.169	10.221	3.34227e-07	6.14236e-05	Depleted	0.023	0.217
OTU_577	-2.805	10.833	5.30385e-07	8.77257e-05	Depleted	0.053	0.377
OTU_218	4.52	10.946	6.86861e-07	0.000103279	Enriched	0.192	0.005
OTU_113	3.479	11.635	8.94456e-07	0.000123286	Enriched	0.352	0.029
OTU_1492	-3.868	9.408	4.12283e-06	0.00052455	Depleted	0.002	0.07
OTU_286	-2.171	11.32	5.56489e-06	0.000657452	Depleted	0.112	0.508
OTU_1336	-3.358	9.717	7.34012e-06	0.000788283	Depleted	0.008	0.113
OTU_14	3.012	12.33	7.62547e-06	0.000788283	Enriched	0.61	0.073
OTU_1522	5.041	10.31	8.53544e-06	0.000830448	Enriched	0.102	0
OTU_209	3.278	10.939	1.31862e-05	0.00117241	Enriched	0.198	0.019
OTU_63	3.605	12.222	1.34679e-05	0.00117241	Enriched	0.565	0.046
OTU_447	-1.927	11.027	2.206e-05	0.00182436	Depleted	0.095	0.353
OTU_172	-2.318	10.88	3.54937e-05	0.00274928	Depleted	0.07	0.336
OTU_1549	5.312	10.483	3.79275e-05	0.00274928	Enriched	0.126	0
OTU_163	5.911	10.908	3.82306e-05	0.00274928	Enriched	0.192	0
OTU_22	4.431	10.871	7.02651e-05	0.00484244	Enriched	0.187	0.005
OTU_71	-2.236	11.296	8.98462e-05	0.00594422	Depleted	0.11	0.512
OTU_141	5.634	10.702	9.86037e-05	0.00627271	Enriched	0.153	0
OTU_154	2.889	11.944	0.000108196	0.00652145	Enriched	0.449	0.059
OTU_1637	-2.561	9.822	0.000110399	0.00652145	Depleted	0.017	0.117
OTU_105	5.284	10.465	0.000135907	0.00775137	Enriched	0.122	0
OTU_602	5.023	10.298	0.000152252	0.00814873	Enriched	0.1	0
OTU_409	4.881	10.214	0.000152727	0.00814873	Enriched	0.095	0
OTU_193	4.141	10.662	0.000192406	0.009945	Enriched	0.148	0.005
OTU_1223	-2.876	9.58	0.000213044	0.010678	Depleted	0.008	0.08
OTU_597	3.487	10.249	0.000251692	0.0122441	Enriched	0.097	0.005
OTU_543	2.967	10.373	0.000262474	0.0124038	Enriched	0.109	0.01
OTU_250	-2.442	9.72	0.000279211	0.0128282	Depleted	0.015	0.096
OTU_849	4.64	10.075	0.000293969	0.0131412	Enriched	0.078	0
OTU_423	4.884	10.216	0.000312792	0.0133506	Enriched	0.093	0
OTU_987	-3.308	9.289	0.000316602	0.0133506	Depleted	0.002	0.042
OTU_260	5.075	10.333	0.000322867	0.0133506	Enriched	0.107	0
OTU_659	2.696	11.129	0.000356052	0.0143636	Enriched	0.222	0.032
OTU_504	-2.685	9.531	0.000374844	0.0147617	Depleted	0.009	0.068
OTU_460	-2.917	9.502	0.000393906	0.0151516	Depleted	0.007	0.073
OTU_223	-1.694	11.788	0.000457775	0.0170868	Depleted	0.205	0.643
OTU_873	5.165	10.386	0.000464878	0.0170868	Enriched	0.11	0
OTU_1519	-3.238	9.155	0.000527022	0.0188394	Depleted	0	0.029
OTU_1037	4.435	9.965	0.000535339	0.0188394	Enriched	0.067	0
OTU_451	-1.69	11.394	0.000593527	0.0204519	Depleted	0.145	0.478
OTU_102	3.461	10.759	0.000671389	0.0226628	Enriched	0.163	0.01
OTU_1605	-2.86	9.494	0.000721826	0.023834	Depleted	0.007	0.067
OTU_398	4.441	9.969	0.000734907	0.023834	Enriched	0.067	0
OTU_1275	-2.033	10.285	0.000861355	0.0273977	Depleted	0.042	0.164
OTU_405	4.436	9.966	0.000979598	0.0305708	Enriched	0.067	0
OTU_1279	-2.122	9.89	0.00106605	0.0326528	Depleted	0.024	0.113
OTU_467	-1.334	11.413	0.00115973	0.0348763	Depleted	0.164	0.413
OTU_1443	-2.516	9.417	0.00130384	0.0379777	Depleted	0.007	0.052
OTU_687	-2.467	9.473	0.00130878	0.0379777	Depleted	0.008	0.061
OTU_256	-1.746	10.289	0.00133824	0.0381628	Depleted	0.047	0.161
OTU_971	-1.962	10.122	0.0013818	0.0387373	Depleted	0.036	0.146
OTU_1132	4.008	9.76	0.0014658	0.0404071	Enriched	0.048	0
OTU_1154	3.958	9.738	0.00150106	0.0406738	Enriched	0.047	0
OTU_125	4.768	10.149	0.00152465	0.0406738	Enriched	0.085	0
OTU_65	-1.88	10.313	0.00156849	0.041179	Depleted	0.045	0.183
OTU_1473	3.53	10.267	0.00163795	0.0423309	Enriched	0.097	0.005
OTU_546	3.852	9.692	0.00178508	0.0454233	Enriched	0.043	0
OTU_271	2.277	10.706	0.00187668	0.0460866	Enriched	0.15	0.027
OTU_1305	-3.033	9.131	0.00188069	0.0460866	Depleted	0	0.026
OTU_254	4.624	10.068	0.00189473	0.0460866	Enriched	0.077	0
OTU_79	2.821	10.629	0.00216353	0.051862	Enriched	0.144	0.015
OTU_549	4.394	9.946	0.00229385	0.0535656	Enriched	0.065	0
OTU_231	-2.498	9.803	0.00233896	0.0535656	Depleted	0.017	0.115
OTU_464	-1.665	10.451	0.00236667	0.0535656	Depleted	0.059	0.196
OTU_767	-1.757	10.675	0.00237273	0.0535656	Depleted	0.07	0.252
OTU_173	2.102	11.146	0.00239652	0.0535656	Enriched	0.224	0.045
OTU_738	4.351	9.922	0.00247152	0.0545052	Enriched	0.062	0
OTU_773	4.165	9.833	0.00257348	0.056007	Enriched	0.055	0
OTU_567	3.9	9.713	0.00261813	0.0562388	Enriched	0.045	0
OTU_1127	3.688	9.625	0.00269508	0.056326	Enriched	0.039	0
OTU_347	-2.08	9.954	0.00270671	0.056326	Depleted	0.027	0.124
OTU_669	-2.442	9.6	0.00281292	0.056326	Depleted	0.012	0.072
OTU_1427	3.243	10.11	0.00281742	0.056326	Enriched	0.079	0.005
OTU_714	3.887	9.709	0.00283078	0.056326	Enriched	0.043	0
OTU_826	-1.931	9.957	0.00284488	0.056326	Depleted	0.028	0.118
OTU_288	2.401	10.336	0.002877	0.056326	Enriched	0.1	0.017
OTU_362	3.783	9.666	0.00291234	0.056326	Enriched	0.04	0
OTU_337	2.506	10.851	0.00294903	0.056326	Enriched	0.176	0.029
OTU_1652	4.159	9.831	0.00296274	0.056326	Enriched	0.055	0
OTU_1152	3.689	9.626	0.0030072	0.0565217	Enriched	0.04	0
OTU_795	-2.432	9.533	0.00310348	0.0576574	Depleted	0.01	0.068
OTU_766	-2.268	9.716	0.00313734	0.0576574	Depleted	0.018	0.084
OTU_1620	3.586	9.589	0.00324108	0.0589094	Enriched	0.035	0
OTU_64	1.971	10.95	0.00330668	0.0594483	Enriched	0.186	0.044
OTU_988	-2.152	9.7	0.00346786	0.0616758	Depleted	0.017	0.086
OTU_61	2.379	10.819	0.00363778	0.0634303	Enriched	0.168	0.025
OTU_1010	-2.469	9.339	0.00366732	0.0634303	Depleted	0.005	0.041
OTU_155	2.44	10.366	0.00368157	0.0634303	Enriched	0.105	0.017
OTU_221	-1.244	12.212	0.00454461	0.0768027	Depleted	0.332	0.783
OTU_453	3.062	10.012	0.00461364	0.0768027	Enriched	0.071	0.005
OTU_654	3.67	9.619	0.00462385	0.0768027	Enriched	0.039	0
OTU_438	1.58	11.8	0.00464345	0.0768027	Enriched	0.375	0.116
OTU_1486	3.768	9.659	0.00479096	0.0784579	Enriched	0.04	0
OTU_488	3.681	9.624	0.00499663	0.0810238	Enriched	0.038	0
OTU_145	3.735	9.646	0.00531162	0.0852954	Enriched	0.04	0
OTU_754	3.507	9.558	0.0054517	0.086703	Enriched	0.033	0
OTU_100	1.754	12.305	0.00552663	0.0870576	Enriched	0.568	0.168
OTU_1406	3.684	9.625	0.00582019	0.0908169	Enriched	0.038	0
OTU_898	2.51	10.373	0.00623548	0.0963877	Enriched	0.107	0.015
OTU_1439	3.488	9.55	0.00632491	0.0968649	Enriched	0.033	0
OTU_632	2.202	10.195	0.00653723	0.0982844	Enriched	0.088	0.015
OTU_513	1.427	11.843	0.00653922	0.0982844	Enriched	0.386	0.142
OTU_224	3.648	9.612	0.00661569	0.0982844	Enriched	0.035	0
OTU_951	-2.604	9.089	0.00665529	0.0982844	Depleted	0	0.017
OTU_316	3.43	9.53	0.00686895	0.100316	Enriched	0.032	0
OTU_6	1.365	12.86	0.0069278	0.100316	Enriched	0.848	0.318
OTU_537	3.99	9.757	0.00701481	0.100316	Enriched	0.05	0
OTU_794	2.68	10.218	0.00703544	0.100316	Enriched	0.09	0.012
OTU_1096	-2.659	9.191	0.00713116	0.100438	Depleted	0.002	0.025
OTU_80	1.859	10.614	0.00716543	0.100438	Enriched	0.134	0.034
OTU_448	3.49	9.552	0.00741215	0.100951	Enriched	0.034	0
OTU_516	2.23	10.447	0.00741755	0.100951	Enriched	0.112	0.022
OTU_1210	3.214	9.456	0.00741846	0.100951	Enriched	0.027	0
OTU_428	3.45	9.539	0.00750502	0.100951	Enriched	0.032	0
OTU_1062	-2.528	9.081	0.00752457	0.100951	Depleted	0	0.015
OTU_1080	1.972	10.764	0.00774815	0.100951	Enriched	0.158	0.037
OTU_782	-2.571	9.184	0.00777043	0.100951	Depleted	0.002	0.027
OTU_98	3.182	10.076	0.00778846	0.100951	Enriched	0.077	0.005
OTU_304	3.85	9.693	0.00779235	0.100951	Enriched	0.043	0
OTU_458	3.649	9.612	0.00781238	0.100951	Enriched	0.037	0
OTU_859	3.508	9.56	0.00804094	0.103099	Enriched	0.034	0
OTU_559	3.427	9.53	0.00818816	0.104179	Enriched	0.032	0
OTU_235	2.36	10.042	0.00832946	0.105167	Enriched	0.072	0.012
OTU_1570	-2.262	9.366	0.00862253	0.106906	Depleted	0.007	0.046
OTU_571	3.849	9.693	0.00872327	0.106906	Enriched	0.044	0
OTU_152	1.921	12.034	0.00876719	0.106906	Enriched	0.461	0.113
OTU_753	-1.693	10.127	0.00877291	0.106906	Depleted	0.041	0.133
OTU_364	3.813	9.677	0.00879036	0.106906	Enriched	0.042	0
OTU_211	1.52	11.409	0.00886849	0.107069	Enriched	0.273	0.089
OTU_742	2.744	9.85	0.00900424	0.10792	Enriched	0.057	0.005
OTU_1133	3.14	9.437	0.00911161	0.108374	Enriched	0.025	0
OTU_263	-1.318	10.84	0.00917316	0.108374	Depleted	0.101	0.242
OTU_1496	3.302	9.488	0.00986715	0.115747	Enriched	0.029	0
OTU_483	1.749	11.576	0.0102505	0.118457	Enriched	0.312	0.086
OTU_529	-1.788	9.746	0.0102985	0.118457	Depleted	0.022	0.081
OTU_533	-1.976	9.386	0.0103131	0.118457	Depleted	0.008	0.042
OTU_1542	3.504	9.558	0.0105994	0.120907	Enriched	0.033	0
OTU_179	-1.998	9.393	0.010728	0.121535	Depleted	0.008	0.044
OTU_67	1.535	10.894	0.0108882	0.12251	Enriched	0.166	0.054
OTU_35	-1.296	11.737	0.0109906	0.122827	Depleted	0.224	0.55
OTU_346	3.666	9.62	0.0111038	0.123259	Enriched	0.039	0
OTU_1180	3.222	9.463	0.0112422	0.123964	Enriched	0.027	0
OTU_188	-1.912	10.522	0.0116006	0.127069	Depleted	0.061	0.232
OTU_1466	3.338	9.499	0.0117509	0.127868	Enriched	0.03	0
OTU_1624	-2.378	9.159	0.0118732	0.128182	Depleted	0.002	0.02
OTU_243	3.634	9.607	0.011963	0.128182	Enriched	0.037	0
OTU_480	3.604	9.597	0.012044	0.128182	Enriched	0.037	0
OTU_156	2.364	10.559	0.0120897	0.128182	Enriched	0.135	0.02
OTU_1259	2.647	9.81	0.0122398	0.128947	Enriched	0.052	0.005
OTU_485	3.554	9.577	0.0124732	0.130574	Enriched	0.035	0
OTU_594	2.486	9.733	0.0126355	0.131441	Enriched	0.046	0.005
OTU_420	3.208	9.457	0.0127643	0.131951	Enriched	0.027	0
OTU_1334	-2.396	9.248	0.0130252	0.133812	Depleted	0.003	0.032
OTU_569	3.137	9.436	0.0131258	0.133934	Enriched	0.025	0
OTU_171	3.28	9.481	0.0132718	0.133934	Enriched	0.028	0
OTU_1428	2.384	10.301	0.0133489	0.133934	Enriched	0.094	0.015
OTU_1633	3.186	9.456	0.013361	0.133934	Enriched	0.025	0
OTU_194	2.607	9.793	0.0139312	0.138323	Enriched	0.05	0.005
OTU_631	-2.131	9.408	0.0139662	0.138323	Depleted	0.009	0.047
OTU_23	1.339	11.774	0.0141044	0.138478	Enriched	0.358	0.14
OTU_1219	3.776	9.669	0.0142625	0.138478	Enriched	0.044	0
OTU_1515	2.071	10.666	0.0142676	0.138478	Enriched	0.142	0.03
OTU_153	2.015	10.627	0.0144002	0.138478	Enriched	0.137	0.03
OTU_936	2.979	9.396	0.0144004	0.138478	Enriched	0.022	0
OTU_301	-1.531	10.432	0.0145584	0.139188	Depleted	0.059	0.174
OTU_727	2.395	10.083	0.0149731	0.141176	Enriched	0.077	0.01
OTU_437	3.454	9.54	0.0150591	0.141176	Enriched	0.032	0
OTU_360	3.131	9.434	0.0150876	0.141176	Enriched	0.025	0
OTU_421	1.711	10.611	0.0151707	0.141176	Enriched	0.133	0.037
OTU_520	-1.37	10.26	0.0151931	0.141176	Depleted	0.052	0.135
OTU_1561	3.048	9.409	0.0162156	0.149102	Enriched	0.023	0
OTU_911	3.358	9.508	0.0162264	0.149102	Enriched	0.03	0
OTU_167	2.949	9.379	0.0164525	0.149628	Enriched	0.022	0
OTU_705	1.479	10.794	0.0164888	0.149628	Enriched	0.156	0.055
OTU_402	-1.788	9.573	0.016555	0.149628	Depleted	0.015	0.059
OTU_929	3.281	9.482	0.0167063	0.150175	Enriched	0.028	0
OTU_1339	-1.919	9.443	0.0169608	0.151031	Depleted	0.01	0.047
OTU_551	3.205	9.457	0.0169842	0.151031	Enriched	0.027	0
OTU_920	2.97	9.389	0.017086	0.151125	Enriched	0.022	0
OTU_822	3.484	9.553	0.0178785	0.156231	Enriched	0.033	0
OTU_1159	-2.243	9.359	0.0180148	0.156231	Depleted	0.007	0.04
OTU_239	3.201	9.456	0.0180438	0.156231	Enriched	0.027	0
OTU_28	1.649	12.047	0.018107	0.156231	Enriched	0.454	0.146
OTU_1449	2.92	9.94	0.0181357	0.156231	Enriched	0.065	0.005
OTU_969	-2.307	9.235	0.0186966	0.160229	Depleted	0.003	0.025
OTU_724	-2.285	9.068	0.0193645	0.163065	Depleted	0	0.012
OTU_514	-1.638	9.898	0.0193799	0.163065	Depleted	0.029	0.098
OTU_251	2.269	9.982	0.0194492	0.163065	Enriched	0.065	0.01
OTU_219	2.621	9.794	0.0194526	0.163065	Enriched	0.05	0.005
OTU_783	2.85	9.352	0.0195204	0.163065	Enriched	0.02	0
OTU_707	3.12	9.431	0.0202069	0.167951	Enriched	0.025	0
OTU_561	-1.251	10.771	0.0203678	0.168441	Depleted	0.094	0.22
OTU_925	2.953	9.382	0.0206659	0.16972	Enriched	0.022	0
OTU_1575	2.842	9.349	0.0207276	0.16972	Enriched	0.021	0
OTU_1008	-2.223	9.062	0.0209161	0.17042	Depleted	0	0.01
OTU_1467	2.966	9.387	0.0211239	0.171269	Enriched	0.022	0
OTU_41	-1.272	10.618	0.0212478	0.171434	Depleted	0.081	0.191
OTU_715	2.757	9.333	0.0214558	0.172271	Enriched	0.018	0
OTU_215	-1.31	10.476	0.0218947	0.174946	Depleted	0.07	0.178
OTU_122	2.842	9.35	0.0223667	0.177858	Enriched	0.02	0
OTU_1666	-2.157	9.056	0.0224944	0.178018	Depleted	0	0.012
OTU_1006	3.048	9.41	0.02288	0.179424	Enriched	0.023	0
OTU_1211	-2.143	9.055	0.022889	0.179424	Depleted	0	0.012
OTU_842	-2.121	9.053	0.0234554	0.180624	Depleted	0	0.01
OTU_1082	2.881	9.366	0.0236415	0.180624	Enriched	0.02	0
OTU_525	2.862	9.358	0.0237266	0.180624	Enriched	0.021	0
OTU_240	2.85	9.353	0.0237525	0.180624	Enriched	0.02	0
OTU_1012	2.848	9.353	0.0237542	0.180624	Enriched	0.02	0
OTU_133	-2.108	9.052	0.0238066	0.180624	Depleted	0	0.01
OTU_298	-2.108	9.052	0.0238066	0.180624	Depleted	0	0.01
OTU_692	3.053	9.411	0.0240888	0.181161	Enriched	0.023	0
OTU_1588	2.757	9.332	0.0240963	0.181161	Enriched	0.018	0
OTU_206	-2.267	9.145	0.02438	0.181952	Depleted	0.002	0.02
OTU_84	-1.5	12.11	0.0244216	0.181952	Depleted	0.274	0.782
OTU_1346	2.859	9.357	0.0249943	0.183784	Enriched	0.02	0
OTU_117	1.449	10.962	0.0250164	0.183784	Enriched	0.186	0.062
OTU_126	-2.326	9.302	0.0251425	0.183784	Depleted	0.005	0.04
OTU_1308	-1.723	9.689	0.0251936	0.183784	Depleted	0.02	0.072
OTU_1250	3.198	9.456	0.025298	0.183784	Enriched	0.027	0
OTU_1559	-2.111	9.272	0.0253341	0.183784	Depleted	0.005	0.03
OTU_282	2.869	9.361	0.0255205	0.183978	Enriched	0.02	0
OTU_1095	-1.792	9.475	0.0256263	0.183978	Depleted	0.012	0.051
OTU_694	2.851	9.354	0.0256946	0.183978	Enriched	0.02	0
OTU_965	1.918	10.089	0.0260077	0.184848	Enriched	0.072	0.019
OTU_568	3.017	9.4	0.0260396	0.184848	Enriched	0.023	0
OTU_939	-2.286	9.149	0.0264449	0.186922	Depleted	0.002	0.02
OTU_1248	-1.516	9.765	0.0266531	0.187226	Depleted	0.025	0.073
OTU_861	-1.616	9.723	0.0267181	0.187226	Depleted	0.022	0.072
OTU_446	-1.887	9.588	0.0268466	0.187226	Depleted	0.016	0.064
OTU_798	3.484	9.549	0.0269406	0.187226	Enriched	0.032	0
OTU_450	1.413	10.693	0.0271825	0.188117	Enriched	0.145	0.051
OTU_656	-1.88	9.323	0.0278703	0.191355	Depleted	0.007	0.034
OTU_431	3.015	9.4	0.0278819	0.191355	Enriched	0.023	0
OTU_760	2.776	9.339	0.0286868	0.196066	Enriched	0.019	0
Apple VS Grass
ID	log2FC	log2CPM	PValue	FDR	level	Mean Apple	Mean Grass
OTU_11	6.492	13.197	4.26384e-11	7.05239e-08	Enriched	1.157	0.01
OTU_104	-2.868	12.125	1.27676e-10	1.05588e-07	Depleted	0.148	1.254
OTU_124	4.189	11.824	1.11904e-09	6.16964e-07	Enriched	0.402	0.02
OTU_772	-4.468	9.624	4.34161e-09	1.79526e-06	Depleted	0.002	0.121
OTU_403	-4.588	9.442	5.91856e-09	1.95786e-06	Depleted	0	0.077
OTU_218	5.996	10.974	9.18848e-09	2.53296e-06	Enriched	0.192	0
OTU_666	-3.608	10.046	1.49971e-08	3.54359e-06	Depleted	0.012	0.196
OTU_64	5.91	10.906	2.58534e-08	5.34519e-06	Enriched	0.186	0
OTU_557	-3.479	10.076	8.20677e-08	1.50822e-05	Depleted	0.013	0.194
OTU_162	-2.542	10.707	2.6934e-07	4.26528e-05	Depleted	0.052	0.338
OTU_38	3.678	11.85	2.83664e-07	4.26528e-05	Enriched	0.406	0.03
OTU_183	-3.401	9.784	3.12571e-07	4.30827e-05	Depleted	0.008	0.129
OTU_26	5.928	10.921	3.87079e-07	4.92483e-05	Enriched	0.187	0
OTU_397	4.009	12.135	4.30691e-07	5.02977e-05	Enriched	0.508	0.03
OTU_1080	5.665	10.727	4.56146e-07	5.02977e-05	Enriched	0.158	0
OTU_113	3.484	11.677	5.40907e-07	5.59162e-05	Enriched	0.352	0.03
OTU_47	3.071	12.635	6.23048e-07	6.06189e-05	Enriched	0.743	0.09
OTU_645	3.121	11.549	7.93882e-07	7.29489e-05	Enriched	0.315	0.037
OTU_1663	-3.796	9.426	1.09142e-06	9.50114e-05	Depleted	0.002	0.074
OTU_237	-1.991	11.796	2.00601e-06	0.000165897	Depleted	0.169	0.746
OTU_150	4.174	11.171	2.56378e-06	0.000201928	Enriched	0.23	0.01
OTU_1299	4.187	10.66	2.75498e-06	0.000207124	Enriched	0.145	0.007
OTU_1522	5.087	10.34	3.19801e-06	0.000229978	Enriched	0.102	0
OTU_209	3.448	10.975	4.20188e-06	0.00028605	Enriched	0.198	0.019
OTU_79	5.516	10.623	4.32361e-06	0.00028605	Enriched	0.144	0
OTU_278	3.685	11.15	4.65445e-06	0.000296095	Enriched	0.227	0.017
OTU_500	-4.328	9.577	5.03181e-06	0.000308245	Depleted	0.002	0.1
OTU_201	-3.599	9.513	5.43472e-06	0.000321036	Depleted	0.003	0.084
OTU_174	5.028	10.302	6.55595e-06	0.000373915	Enriched	0.099	0
OTU_193	5.606	10.686	7.17698e-06	0.000395691	Enriched	0.148	0
OTU_874	-3.732	9.551	8.47854e-06	0.000452371	Depleted	0.003	0.085
OTU_663	-3.882	9.277	1.01038e-05	0.000522238	Depleted	0	0.045
OTU_95	4.101	10.58	1.11181e-05	0.000557252	Enriched	0.135	0.005
OTU_376	-2.683	10.31	1.1905e-05	0.000579143	Depleted	0.03	0.248
OTU_572	-3.512	9.488	1.41909e-05	0.000670623	Depleted	0.003	0.083
OTU_1297	-2.907	9.911	1.79794e-05	0.000826054	Depleted	0.015	0.153
OTU_1395	-4.021	9.307	1.88489e-05	0.00084113	Depleted	0	0.05
OTU_1268	-3.741	9.252	1.95352e-05	0.00084113	Depleted	0	0.04
OTU_9	2	13.548	1.98332e-05	0.00084113	Enriched	1.398	0.38
OTU_898	5.126	10.365	2.12126e-05	0.000877142	Enriched	0.107	0
OTU_1448	-2.738	9.857	2.51212e-05	0.00101342	Depleted	0.016	0.131
OTU_424	-3.426	9.341	2.60469e-05	0.00102575	Depleted	0.002	0.052
OTU_1646	3.896	10.447	2.84022e-05	0.00109249	Enriched	0.114	0.005
OTU_617	4.04	10.539	3.4741e-05	0.00130595	Enriched	0.129	0.005
OTU_659	3.334	11.153	4.05096e-05	0.00148895	Enriched	0.222	0.02
OTU_103	-3.01	9.475	4.32495e-05	0.0015551	Depleted	0.005	0.069
OTU_1052	4.647	10.079	4.71011e-05	0.00164842	Enriched	0.075	0
OTU_668	-3.435	9.34	4.78382e-05	0.00164842	Depleted	0.002	0.052
OTU_1359	-2.756	9.676	5.85199e-05	0.00197534	Depleted	0.01	0.099
OTU_288	3.693	10.338	6.13234e-05	0.00199253	Enriched	0.1	0.007
OTU_1161	-2.78	9.671	6.25598e-05	0.00199253	Depleted	0.01	0.101
OTU_727	-2.318	11.001	6.26429e-05	0.00199253	Depleted	0.077	0.445
OTU_141	5.68	10.737	6.63431e-05	0.0020686	Enriched	0.153	0
OTU_211	2.579	11.388	6.75361e-05	0.0020686	Enriched	0.273	0.045
OTU_1092	4.82	10.179	7.65496e-05	0.00230205	Enriched	0.085	0
OTU_1600	3.014	10.914	7.84869e-05	0.00231817	Enriched	0.177	0.022
OTU_105	5.33	10.497	8.36091e-05	0.00242613	Enriched	0.122	0
OTU_18	2.09	12.089	8.65297e-05	0.00246759	Enriched	0.469	0.117
OTU_438	2.386	11.792	8.80229e-05	0.00246763	Enriched	0.375	0.077
OTU_508	-2.081	10.759	9.4737e-05	0.00258812	Depleted	0.065	0.319
OTU_123	4.712	10.116	9.63609e-05	0.00258812	Enriched	0.08	0
OTU_648	-2.324	10.294	9.70154e-05	0.00258812	Depleted	0.035	0.213
OTU_516	3.882	10.438	0.000100659	0.00263091	Enriched	0.112	0.005
OTU_497	-2.564	9.917	0.000102688	0.00263091	Depleted	0.018	0.145
OTU_718	-2.989	9.368	0.000104429	0.00263091	Depleted	0.003	0.054
OTU_553	-2.696	9.646	0.000104982	0.00263091	Depleted	0.01	0.089
OTU_411	4.824	10.18	0.000112811	0.00278492	Enriched	0.085	0
OTU_167	-2.391	9.968	0.000118483	0.00288192	Depleted	0.022	0.139
OTU_464	4.305	9.901	0.000120293	0.00288354	Enriched	0.059	0
OTU_691	-3.563	9.222	0.000123026	0.00290692	Depleted	0	0.035
OTU_85	2.065	12.377	0.000130535	0.00302249	Enriched	0.588	0.153
OTU_49	-2.398	10.02	0.000131571	0.00302249	Depleted	0.024	0.149
OTU_306	2.909	11.057	0.000137148	0.00309996	Enriched	0.203	0.029
OTU_1088	4.386	9.943	0.000138692	0.00309996	Enriched	0.063	0
OTU_588	4.5	10.002	0.000143204	0.00315813	Enriched	0.067	0
OTU_1627	-2.524	9.853	0.000148542	0.00323274	Depleted	0.018	0.128
OTU_1422	4.719	10.122	0.000154672	0.0033129	Enriched	0.08	0
OTU_228	-2.822	9.602	0.000156231	0.0033129	Depleted	0.008	0.082
OTU_152	3.074	12.025	0.000160829	0.00336722	Enriched	0.461	0.055
OTU_251	4.444	9.971	0.000167535	0.00346379	Enriched	0.065	0
OTU_300	4.335	9.915	0.000170361	0.00347873	Enriched	0.06	0
OTU_1281	-2.904	9.537	0.000188521	0.00379155	Depleted	0.007	0.075
OTU_115	2.123	11.7	0.000190265	0.00379155	Enriched	0.346	0.084
OTU_1216	-3.253	9.312	0.00019749	0.00387316	Depleted	0.002	0.049
OTU_267	-2.421	9.825	0.000199044	0.00387316	Depleted	0.017	0.116
OTU_347	-2.499	10.143	0.000204742	0.00390687	Depleted	0.027	0.177
OTU_340	-2.16	10.28	0.0002055	0.00390687	Depleted	0.037	0.198
OTU_374	4.765	10.149	0.000215694	0.00401201	Enriched	0.084	0
OTU_144	-1.83	11.544	0.000215882	0.00401201	Depleted	0.152	0.596
OTU_333	2.274	12.255	0.000224528	0.00412632	Enriched	0.542	0.119
OTU_29	2.103	12.299	0.000239661	0.00435604	Enriched	0.544	0.143
OTU_136	3.209	11.621	0.00024283	0.00436566	Enriched	0.337	0.035
OTU_199	2.966	10.619	0.000245762	0.00437086	Enriched	0.137	0.017
OTU_400	-2.997	9.365	0.000261387	0.00455695	Depleted	0.003	0.054
OTU_253	3.271	10.08	0.000261735	0.00455695	Enriched	0.074	0.005
OTU_951	-3.405	9.199	0.000265363	0.0045617	Depleted	0	0.034
OTU_134	-2.281	10.119	0.000270205	0.0045617	Depleted	0.029	0.172
OTU_1481	-2.876	9.523	0.000270282	0.0045617	Depleted	0.007	0.079
OTU_783	-2.329	9.897	0.000312155	0.00515746	Depleted	0.02	0.122
OTU_249	-1.705	11.107	0.000315658	0.00515746	Depleted	0.109	0.384
OTU_153	3.453	10.617	0.000316398	0.00515746	Enriched	0.137	0.01
OTU_156	4.009	10.553	0.000318054	0.00515746	Enriched	0.135	0.007
OTU_873	5.211	10.417	0.000326208	0.00523832	Enriched	0.11	0
OTU_780	-2.457	9.82	0.000347239	0.00552244	Depleted	0.017	0.114
OTU_506	-3.139	9.287	0.000360863	0.00568445	Depleted	0.002	0.047
OTU_440	-1.76	11.075	0.00037357	0.00582911	Depleted	0.102	0.372
OTU_334	3.868	9.709	0.000398914	0.00616638	Enriched	0.042	0
OTU_473	-3.119	9.159	0.000461419	0.00706655	Depleted	0	0.027
OTU_117	-1.7	11.738	0.00049745	0.00754846	Depleted	0.186	0.633
OTU_1455	-2.155	10.179	0.000510385	0.00767434	Depleted	0.032	0.164
OTU_796	-1.811	10.94	0.000544503	0.00811359	Depleted	0.088	0.341
OTU_65	3.971	9.75	0.000550314	0.00812695	Enriched	0.045	0
OTU_405	4.481	9.992	0.000573953	0.00840104	Enriched	0.067	0
OTU_1290	4.144	9.825	0.000608923	0.00883473	Enriched	0.053	0
OTU_1034	-2.644	9.474	0.000626673	0.00897971	Depleted	0.007	0.062
OTU_1258	3.985	9.75	0.000629774	0.00897971	Enriched	0.047	0
OTU_908	3.841	9.688	0.000645505	0.00912535	Enriched	0.042	0
OTU_352	4.287	9.894	0.000658312	0.00922753	Enriched	0.059	0
OTU_832	-3.011	9.577	0.000703919	0.00978389	Depleted	0.007	0.08
OTU_1061	-2.566	9.597	0.00074837	0.010315	Depleted	0.01	0.088
OTU_1154	4.002	9.76	0.000769742	0.0104366	Enriched	0.047	0
OTU_345	2.072	11.024	0.00076981	0.0104366	Enriched	0.193	0.047
OTU_235	3.219	10.047	0.000792084	0.0106513	Enriched	0.072	0.005
OTU_577	4.154	9.83	0.000871728	0.0116277	Enriched	0.053	0
OTU_956	4.01	9.764	0.000899183	0.011898	Enriched	0.047	0
OTU_439	-2.915	9.247	0.000924345	0.0121339	Depleted	0.002	0.035
OTU_248	2.057	11.247	0.00096165	0.0125242	Enriched	0.236	0.062
OTU_219	4.084	9.797	0.000985809	0.0127385	Enriched	0.05	0
OTU_1415	-2.506	9.44	0.00106911	0.0136033	Depleted	0.007	0.057
OTU_125	4.813	10.177	0.00106918	0.0136033	Enriched	0.085	0
OTU_1498	-2.44	9.572	0.00110556	0.0139587	Depleted	0.01	0.081
OTU_147	-2.293	9.673	0.00114393	0.014287	Depleted	0.014	0.084
OTU_120	-1.991	9.861	0.00114883	0.014287	Depleted	0.022	0.102
OTU_711	3.462	10.644	0.00118683	0.0146494	Enriched	0.142	0.012
OTU_1501	3.552	9.576	0.001207	0.0147792	Enriched	0.034	0
OTU_200	-2.166	9.687	0.00121522	0.0147792	Depleted	0.015	0.089
OTU_254	4.67	10.095	0.00130423	0.0157459	Enriched	0.077	0
OTU_1456	-1.792	10.558	0.00132163	0.0158404	Depleted	0.061	0.242
OTU_111	4.023	9.77	0.00146513	0.017434	Enriched	0.051	0
OTU_549	4.439	9.972	0.00150169	0.0177414	Enriched	0.065	0
OTU_1152	3.734	9.647	0.00154915	0.0180788	Enriched	0.04	0
OTU_1113	-1.893	9.872	0.00155211	0.0180788	Depleted	0.024	0.102
OTU_475	3.49	9.557	0.0015739	0.0181319	Enriched	0.032	0
OTU_309	-2.791	9.419	0.00157929	0.0181319	Depleted	0.005	0.055
OTU_773	4.21	9.857	0.00158956	0.0181319	Enriched	0.055	0
OTU_714	3.931	9.73	0.00162467	0.0182149	Enriched	0.043	0
OTU_996	-2.352	9.799	0.00162492	0.0182149	Depleted	0.017	0.107
OTU_603	-2.056	9.876	0.00163171	0.0182149	Depleted	0.022	0.112
OTU_447	2.449	10.308	0.00164089	0.0182149	Enriched	0.095	0.017
OTU_949	-2.381	9.62	0.00165549	0.0182388	Depleted	0.012	0.084
OTU_1131	4.102	9.806	0.00166509	0.0182388	Enriched	0.05	0
OTU_265	4.898	10.222	0.00169575	0.0184524	Enriched	0.087	0
OTU_998	3.826	9.684	0.00173157	0.018719	Enriched	0.042	0
OTU_1121	3.8	9.675	0.0017522	0.0188191	Enriched	0.04	0
OTU_635	3.681	9.627	0.00185448	0.0196715	Enriched	0.037	0
OTU_76	2.803	11.341	0.00185535	0.0196715	Enriched	0.263	0.039
OTU_283	2.579	10.365	0.00191323	0.0200451	Enriched	0.103	0.015
OTU_375	2.186	10.568	0.00191483	0.0200451	Enriched	0.125	0.032
OTU_69	-1.413	11.665	0.00198373	0.0206358	Depleted	0.191	0.569
OTU_122	-2.049	9.811	0.00204653	0.021156	Depleted	0.02	0.104
OTU_445	3.917	9.724	0.00208843	0.0214057	Enriched	0.043	0
OTU_1366	-2.747	9.223	0.00209657	0.0214057	Depleted	0.002	0.034
OTU_1171	-2.344	9.555	0.0021641	0.0219596	Depleted	0.01	0.072
OTU_423	3.596	10.259	0.00218845	0.0220713	Enriched	0.093	0.005
OTU_1655	-2.964	9.254	0.0022472	0.0225265	Depleted	0.002	0.035
OTU_1227	-2.925	9.139	0.00226993	0.0225948	Depleted	0	0.024
OTU_282	-2.118	9.845	0.00228134	0.0225948	Depleted	0.02	0.107
OTU_1274	-2.897	9.135	0.00239886	0.0236174	Depleted	0	0.022
OTU_106	2.629	10.423	0.00248732	0.0243433	Enriched	0.11	0.019
OTU_1545	-2.873	9.132	0.00252426	0.0245596	Depleted	0	0.024
OTU_1134	-2.868	9.132	0.00254728	0.0246386	Depleted	0	0.022
OTU_478	-1.631	11.167	0.00259579	0.0248024	Depleted	0.115	0.394
OTU_489	3.605	9.597	0.0026153	0.0248024	Enriched	0.036	0
OTU_1211	-2.854	9.13	0.00261861	0.0248024	Depleted	0	0.022
OTU_695	4.062	9.785	0.00262419	0.0248024	Enriched	0.047	0
OTU_184	-1.877	10.286	0.00264038	0.0248136	Depleted	0.042	0.178
OTU_784	-2.842	9.129	0.00268318	0.0250698	Depleted	0	0.022
OTU_159	-1.95	9.787	0.00269796	0.0250698	Depleted	0.021	0.092
OTU_848	-2.834	9.128	0.00272932	0.0252195	Depleted	0	0.022
OTU_1515	2.645	10.683	0.00274462	0.02522	Enriched	0.142	0.022
OTU_948	-2.823	9.126	0.00278185	0.0254208	Depleted	0	0.02
OTU_1567	-2.815	9.125	0.00282923	0.0257118	Depleted	0	0.02
OTU_1486	3.811	9.68	0.00287365	0.0259728	Enriched	0.04	0
OTU_570	3.75	9.656	0.00291179	0.0260903	Enriched	0.038	0
OTU_382	3.667	9.622	0.00291821	0.0260903	Enriched	0.038	0
OTU_32	2.401	12.188	0.00298674	0.0265595	Enriched	0.517	0.099
OTU_917	-1.51	10.673	0.00304003	0.0268888	Depleted	0.074	0.238
OTU_754	3.551	9.578	0.00308593	0.0271497	Enriched	0.033	0
OTU_172	3.173	10.041	0.00310695	0.02719	Enriched	0.07	0.005
OTU_574	-2.416	9.429	0.00321471	0.0276639	Depleted	0.007	0.052
OTU_1430	-2.019	9.702	0.003218	0.0276639	Depleted	0.017	0.082
OTU_722	3.618	9.604	0.00322344	0.0276639	Enriched	0.035	0
OTU_449	-1.354	11.608	0.00322801	0.0276639	Depleted	0.187	0.524
OTU_831	-2.085	10.005	0.00326424	0.0278115	Depleted	0.027	0.143
OTU_275	-2.058	9.657	0.00327886	0.0278115	Depleted	0.016	0.079
OTU_128	-1.742	10.627	0.00337112	0.0283516	Depleted	0.066	0.244
OTU_100	-1.418	13.086	0.00337682	0.0283516	Depleted	0.568	1.664
OTU_1251	-2.373	9.34	0.0033981	0.0283862	Depleted	0.005	0.044
OTU_230	2.06	11.153	0.00346734	0.0286377	Enriched	0.218	0.057
OTU_1406	3.728	9.646	0.00347321	0.0286377	Enriched	0.038	0
OTU_683	-1.74	10.574	0.0035115	0.0286377	Depleted	0.062	0.244
OTU_986	-2.054	10.056	0.00351894	0.0286377	Depleted	0.028	0.14
OTU_1319	3.342	9.505	0.00353203	0.0286377	Enriched	0.029	0
OTU_923	-1.802	10.314	0.00353209	0.0286377	Depleted	0.046	0.196
OTU_1439	3.532	9.57	0.0036979	0.0298357	Enriched	0.033	0
OTU_393	3.827	9.687	0.00376269	0.0302071	Enriched	0.042	0
OTU_1418	-2.498	9.278	0.00378046	0.0302071	Depleted	0.003	0.035
OTU_1390	-2.388	9.418	0.00386631	0.0305745	Depleted	0.007	0.054
OTU_785	-2.328	9.671	0.00388	0.0305745	Depleted	0.013	0.096
OTU_460	-2.413	9.425	0.00388189	0.0305745	Depleted	0.007	0.059
OTU_1638	-2.518	9.285	0.0039376	0.0308663	Depleted	0.003	0.039
OTU_224	3.689	9.632	0.00403389	0.0314719	Enriched	0.035	0
OTU_419	-1.919	9.834	0.00407594	0.0316293	Depleted	0.022	0.102
OTU_744	3.346	9.508	0.0040923	0.0316293	Enriched	0.029	0
OTU_921	-1.955	9.644	0.00416677	0.0320551	Depleted	0.015	0.074
OTU_1420	-1.62	10.362	0.00419614	0.0321316	Depleted	0.051	0.177
OTU_1642	-1.886	9.721	0.00426846	0.0325347	Depleted	0.019	0.087
OTU_631	-2.281	9.469	0.00434934	0.0329991	Depleted	0.009	0.059
OTU_493	3.358	9.515	0.00446185	0.0335881	Enriched	0.029	0
OTU_569	-1.894	9.913	0.00446758	0.0335881	Depleted	0.025	0.116
OTU_203	1.763	11.032	0.00461829	0.034564	Enriched	0.193	0.059
OTU_734	-2.5	9.439	0.0046722	0.03481	Depleted	0.007	0.059
OTU_90	-1.532	10.741	0.00471782	0.0349751	Depleted	0.08	0.264
OTU_1331	3.558	9.582	0.00473666	0.0349751	Enriched	0.036	0
OTU_1619	-2.588	9.292	0.00480441	0.0353177	Depleted	0.003	0.044
OTU_758	-2.67	9.316	0.00489068	0.0357279	Depleted	0.003	0.04
OTU_217	-1.772	9.886	0.00490341	0.0357279	Depleted	0.026	0.099
OTU_742	2.864	9.874	0.00494215	0.0358256	Enriched	0.057	0.005
OTU_859	3.552	9.579	0.00496013	0.0358256	Enriched	0.034	0
OTU_661	1.919	10.381	0.00500026	0.0359584	Enriched	0.1	0.025
OTU_368	2.103	10.481	0.00505661	0.0362062	Enriched	0.112	0.025
OTU_733	3.187	9.458	0.0051669	0.0368364	Enriched	0.025	0
OTU_636	3.33	9.5	0.00521625	0.0370287	Enriched	0.028	0
OTU_304	3.894	9.715	0.00526322	0.0372024	Enriched	0.043	0
OTU_559	-1.801	10.039	0.00546977	0.0383928	Depleted	0.032	0.136
OTU_809	2.956	9.912	0.00551431	0.0383928	Enriched	0.057	0.005
OTU_1637	-1.936	9.693	0.00552228	0.0383928	Depleted	0.017	0.079
OTU_23	1.503	11.806	0.00552448	0.0383928	Enriched	0.358	0.137
OTU_767	-1.608	10.671	0.00566562	0.0392089	Depleted	0.07	0.254
OTU_42	-1.755	10.648	0.00573087	0.0394952	Depleted	0.063	0.249
OTU_1096	-2.502	9.192	0.00585151	0.0398909	Depleted	0.002	0.027
OTU_252	-1.861	10.335	0.00585561	0.0398909	Depleted	0.046	0.21
OTU_271	1.872	10.763	0.00586063	0.0398909	Enriched	0.15	0.04
OTU_1129	-2.518	9.196	0.00589109	0.0399338	Depleted	0.002	0.027
OTU_364	3.857	9.699	0.00597674	0.0403345	Enriched	0.042	0
OTU_571	3.893	9.715	0.00601537	0.0403345	Enriched	0.044	0
OTU_320	-1.817	10.033	0.00603992	0.0403345	Depleted	0.032	0.132
OTU_946	3.295	9.495	0.00604773	0.0403345	Enriched	0.027	0
OTU_528	-1.722	10.225	0.00608585	0.0404074	Depleted	0.044	0.159
OTU_1496	3.344	9.507	0.00610752	0.0404074	Enriched	0.029	0
OTU_1427	2.681	10.153	0.00614064	0.0404646	Enriched	0.079	0.01
OTU_882	2.092	10.509	0.00618512	0.040596	Enriched	0.117	0.027
OTU_477	1.762	11	0.00655872	0.042878	Enriched	0.185	0.057
OTU_483	1.952	11.607	0.00668511	0.0435322	Enriched	0.312	0.082
OTU_1506	-2.192	9.58	0.00673609	0.0436921	Depleted	0.012	0.078
OTU_182	1.833	10.856	0.00695464	0.0449335	Enriched	0.163	0.047
OTU_48	-2.568	9.104	0.00707599	0.0454714	Depleted	0	0.019
OTU_1248	3.162	9.444	0.00709287	0.0454714	Enriched	0.025	0
OTU_1370	-1.735	10.266	0.00717148	0.0457835	Depleted	0.044	0.179
OTU_130	3.4	9.525	0.00719692	0.0457835	Enriched	0.03	0
OTU_824	-2.548	9.102	0.00730717	0.0461786	Depleted	0	0.019
OTU_474	3.265	9.481	0.00733239	0.0461786	Enriched	0.027	0
OTU_566	2.262	10.414	0.00741274	0.0461786	Enriched	0.107	0.022
OTU_1364	-2.539	9.101	0.00742419	0.0461786	Depleted	0	0.019
OTU_1520	-2.538	9.101	0.0074339	0.0461786	Depleted	0	0.017
OTU_1282	3.744	9.652	0.00744754	0.0461786	Enriched	0.041	0
OTU_107	1.272	12.744	0.00745447	0.0461786	Enriched	0.738	0.322
OTU_446	-1.842	9.613	0.00750444	0.0463147	Depleted	0.016	0.067
OTU_1322	-2.524	9.099	0.00760278	0.0466581	Depleted	0	0.017
OTU_1470	3.491	9.558	0.0076165	0.0466581	Enriched	0.032	0
OTU_924	-2.509	9.098	0.00779341	0.0474509	Depleted	0	0.017
OTU_1583	-2.507	9.098	0.00780329	0.0474509	Depleted	0	0.015
OTU_158	-1.566	10.065	0.00788522	0.047634	Depleted	0.036	0.124
OTU_524	-2.751	9.223	0.0078942	0.047634	Depleted	0.002	0.034
OTU_1560	-2.319	9.255	0.00791979	0.047634	Depleted	0.003	0.034
OTU_1598	-2.324	9.256	0.00796463	0.0476353	Depleted	0.004	0.034
OTU_724	-2.494	9.096	0.00797761	0.0476353	Depleted	0	0.015
OTU_1665	-2.491	9.096	0.00802003	0.0477163	Depleted	0	0.017
OTU_328	-1.52	10.284	0.00820679	0.0484947	Depleted	0.048	0.161
OTU_234	-2.282	9.258	0.0082095	0.0484947	Depleted	0.003	0.03
OTU_420	3.251	9.475	0.00830096	0.0488604	Enriched	0.027	0
OTU_1067	-2.488	9.189	0.00841239	0.0493407	Depleted	0.002	0.027
OTU_782	-2.53	9.203	0.00862336	0.0502642	Depleted	0.002	0.027
OTU_844	1.567	11.584	0.00866266	0.0502642	Enriched	0.307	0.112
OTU_330	-2.312	9.334	0.00868266	0.0502642	Depleted	0.005	0.04
OTU_451	1.972	10.72	0.00869138	0.0502642	Enriched	0.145	0.035
OTU_1633	3.226	9.473	0.00875626	0.0504629	Enriched	0.025	0
OTU_220	3.006	9.405	0.0088829	0.051015	Enriched	0.022	0
OTU_373	2.407	10.01	0.00905323	0.0518133	Enriched	0.066	0.012
OTU_499	-1.848	9.83	0.0094423	0.0538537	Depleted	0.022	0.101
OTU_1433	2.448	9.703	0.00953624	0.0542026	Enriched	0.041	0.005
OTU_466	-1.41	10.424	0.00965799	0.0547066	Depleted	0.058	0.177
OTU_689	-1.436	10.657	0.00983606	0.0553818	Depleted	0.077	0.245
OTU_1450	-2.499	9.193	0.00984416	0.0553818	Depleted	0.002	0.025
OTU_538	2.76	9.822	0.0100212	0.0559917	Enriched	0.05	0.005
OTU_1312	2.994	9.398	0.0100482	0.0559917	Enriched	0.022	0
OTU_360	3.174	9.452	0.0100541	0.0559917	Enriched	0.025	0
OTU_841	-2.18	9.314	0.010315	0.0572518	Depleted	0.005	0.039
OTU_132	1.433	11.815	0.0104834	0.057992	Enriched	0.356	0.148
OTU_1024	-1.511	10.178	0.0105652	0.0582496	Depleted	0.042	0.143
OTU_450	1.626	10.714	0.0106314	0.0583406	Enriched	0.145	0.047
OTU_623	3.08	9.423	0.0106523	0.0583406	Enriched	0.023	0
OTU_736	-1.771	10.008	0.0108027	0.0589694	Depleted	0.03	0.119
OTU_369	2.401	9.674	0.0110046	0.0597002	Enriched	0.039	0.005
OTU_1561	3.089	9.426	0.0110088	0.0597002	Enriched	0.023	0
OTU_331	-1.325	10.875	0.0110911	0.0599499	Depleted	0.1	0.285
OTU_40	-1.273	11.339	0.0111724	0.0601927	Depleted	0.147	0.388
OTU_929	3.324	9.501	0.011438	0.0614235	Enriched	0.028	0
OTU_763	-2.101	9.504	0.0115022	0.0615505	Depleted	0.011	0.064
OTU_1243	-1.581	10.054	0.0115361	0.0615505	Depleted	0.036	0.126
OTU_965	2.123	10.107	0.0120132	0.0638901	Enriched	0.072	0.015
OTU_452	-1.793	9.511	0.0121684	0.0645082	Depleted	0.012	0.054
OTU_822	3.527	9.573	0.0126824	0.0670184	Enriched	0.033	0
OTU_91	-1.245	11.114	0.0127975	0.0671547	Depleted	0.125	0.332
OTU_815	1.586	10.92	0.0128251	0.0671547	Enriched	0.169	0.057
OTU_1231	3.234	9.471	0.0128342	0.0671547	Enriched	0.027	0
OTU_58	1.247	11.421	0.0128706	0.0671547	Enriched	0.259	0.121
OTU_377	-1.729	9.643	0.0134511	0.0699624	Depleted	0.017	0.069
OTU_1221	-1.432	9.973	0.0135634	0.0703254	Depleted	0.034	0.107
OTU_1537	-2.059	9.369	0.0137231	0.0708269	Depleted	0.007	0.04
OTU_713	2.65	9.778	0.0137457	0.0708269	Enriched	0.047	0.005
OTU_953	-1.206	12.447	0.0140756	0.0723016	Depleted	0.392	0.952
OTU_707	3.162	9.449	0.0142245	0.0728401	Enriched	0.025	0
OTU_1575	2.883	9.366	0.0143839	0.073429	Enriched	0.021	0
OTU_1151	-2.491	9.191	0.0144795	0.0735632	Depleted	0.002	0.025
OTU_325	-1.452	11.105	0.0144991	0.0735632	Depleted	0.114	0.35
OTU_1493	-1.726	9.748	0.0147521	0.0746178	Depleted	0.02	0.08
OTU_448	-1.626	10.024	0.01492	0.0750486	Depleted	0.034	0.119
OTU_1467	3.008	9.404	0.0149841	0.0750486	Enriched	0.022	0
OTU_520	2.086	9.867	0.0149962	0.0750486	Enriched	0.052	0.012
OTU_1435	-1.974	9.284	0.0150205	0.0750486	Depleted	0.005	0.032
OTU_914	-2.001	9.555	0.0150642	0.0750486	Depleted	0.012	0.067
OTU_954	-1.467	10.225	0.015476	0.0768687	Depleted	0.047	0.146
OTU_1170	3.056	9.416	0.016223	0.0801905	Enriched	0.023	0
OTU_919	-1.744	9.698	0.0162417	0.0801905	Depleted	0.019	0.083
OTU_214	-1.958	9.53	0.0163192	0.0803332	Depleted	0.012	0.064
OTU_24	2.347	9.659	0.0164086	0.0805336	Enriched	0.038	0.005
OTU_525	2.903	9.375	0.0169307	0.0827966	Enriched	0.021	0
OTU_567	2.608	9.755	0.0169698	0.0827966	Enriched	0.045	0.005
OTU_1224	2.057	10.102	0.0170728	0.0830541	Enriched	0.073	0.015
OTU_205	-1.724	9.76	0.0171649	0.0832572	Depleted	0.02	0.086
OTU_1611	-2.178	9.311	0.0173732	0.0840212	Depleted	0.005	0.037
OTU_281	1.49	10.518	0.0175687	0.0845287	Enriched	0.113	0.04
OTU_1504	-1.759	9.561	0.0175803	0.0845287	Depleted	0.014	0.059
OTU_389	-2.434	9.186	0.0179175	0.0859	Depleted	0.002	0.025
OTU_1346	2.9	9.374	0.0179901	0.0859989	Enriched	0.02	0
OTU_176	-1.132	12.416	0.0181628	0.0865742	Depleted	0.377	0.928
OTU_118	1.251	11.923	0.0183702	0.0873113	Enriched	0.389	0.181
OTU_1544	2.903	9.375	0.0185163	0.0877532	Enriched	0.02	0
OTU_1250	3.24	9.474	0.0185931	0.0878655	Enriched	0.027	0
OTU_81	-1.038	11.831	0.0189832	0.0894537	Depleted	0.251	0.579
OTU_155	1.743	10.433	0.0190688	0.0896019	Enriched	0.105	0.03
OTU_96	-1.884	9.397	0.0191842	0.0898885	Depleted	0.008	0.044
OTU_30	2.274	9.628	0.0195002	0.0911109	Enriched	0.036	0.005
OTU_227	-1.451	9.96	0.019811	0.0922775	Depleted	0.032	0.104
OTU_285	-1.506	10.179	0.0198614	0.0922775	Depleted	0.042	0.143
OTU_195	-1.001	12.139	0.0199963	0.0926438	Depleted	0.32	0.708
OTU_630	2.984	9.397	0.0201274	0.0929908	Enriched	0.023	0
OTU_380	-2.267	9.167	0.0202905	0.0934834	Depleted	0.002	0.024
OTU_798	3.527	9.569	0.0205326	0.0942014	Enriched	0.032	0
OTU_36	1.123	14.509	0.020563	0.0942014	Enriched	2.593	1.29
OTU_1138	2.667	9.311	0.0206172	0.0942014	Enriched	0.017	0
OTU_703	-2.215	9.16	0.0210801	0.0960509	Depleted	0.002	0.022
OTU_585	2.04	9.84	0.0213397	0.0969667	Enriched	0.049	0.01
OTU_916	2.352	9.667	0.0220738	0.100027	Enriched	0.039	0.007
OTU_482	2.893	9.372	0.0222629	0.100609	Enriched	0.02	0
OTU_137	1.317	11.154	0.0224633	0.101056	Enriched	0.207	0.087
OTU_16	1.187	15.106	0.022484	0.101056	Enriched	3.973	1.89
OTU_1193	2.785	9.343	0.0226877	0.101553	Enriched	0.018	0
OTU_409	2.101	10.299	0.0227174	0.101553	Enriched	0.095	0.02
OTU_1549	2.038	10.584	0.0228067	0.101677	Enriched	0.126	0.03
OTU_932	3.187	9.457	0.0229417	0.102004	Enriched	0.025	0
OTU_716	1.826	10.491	0.0232186	0.102959	Enriched	0.114	0.032
OTU_61	1.749	10.888	0.0233922	0.103451	Enriched	0.168	0.05
OTU_793	-1.394	10.1	0.0236902	0.104489	Depleted	0.041	0.119
OTU_146	1.152	11.483	0.0238781	0.104645	Enriched	0.27	0.133
OTU_388	2.664	9.312	0.0238864	0.104645	Enriched	0.017	0
OTU_455	2.666	9.313	0.0239153	0.104645	Enriched	0.017	0
OTU_534	2.414	9.696	0.0244042	0.106249	Enriched	0.041	0.007
OTU_1651	2.771	9.339	0.0244102	0.106249	Enriched	0.018	0
OTU_1540	-1.88	9.398	0.0245556	0.106414	Depleted	0.008	0.042
OTU_1442	-1.526	9.645	0.0245769	0.106414	Depleted	0.019	0.069
OTU_1405	-2.096	9.069	0.0248925	0.107499	Depleted	0	0.014
OTU_1303	1.859	9.755	0.0250368	0.107841	Enriched	0.044	0.012
OTU_620	2.078	10.092	0.0251955	0.107941	Enriched	0.072	0.015
OTU_335	-2.084	9.068	0.0252472	0.107941	Depleted	0	0.012
OTU_481	-1.616	9.655	0.0252558	0.107941	Depleted	0.019	0.065
OTU_786	-1.499	9.725	0.0253864	0.108033	Depleted	0.022	0.072
OTU_988	2.666	9.314	0.0255304	0.108033	Enriched	0.017	0
OTU_1247	2.669	9.315	0.0255418	0.108033	Enriched	0.017	0
OTU_1249	-2.072	9.067	0.025604	0.108033	Depleted	0	0.01
OTU_1491	-2.072	9.067	0.025604	0.108033	Depleted	0	0.01
OTU_250	2.543	9.283	0.025892	0.108532	Enriched	0.015	0
OTU_1278	-2.062	9.066	0.0259183	0.108532	Depleted	0	0.012
OTU_1337	1.875	10.198	0.025919	0.108532	Enriched	0.08	0.024
OTU_737	-2.051	9.065	0.0262597	0.109303	Depleted	0	0.012
OTU_1371	-2.05	9.065	0.0262792	0.109303	Depleted	0	0.01
OTU_245	-1.409	9.932	0.0264465	0.109303	Depleted	0.03	0.101
OTU_1311	-2.039	9.064	0.0266227	0.109303	Depleted	0	0.01
OTU_1568	-2.039	9.064	0.0266227	0.109303	Depleted	0	0.01
OTU_660	-2.035	9.063	0.0267697	0.109303	Depleted	0	0.01
OTU_501	-2.035	9.063	0.0267697	0.109303	Depleted	0	0.01
OTU_1019	-2.035	9.063	0.0267697	0.109303	Depleted	0	0.01
OTU_486	2.881	9.369	0.0269099	0.109303	Enriched	0.02	0
OTU_1237	-2.028	9.062	0.0269623	0.109303	Depleted	0	0.01
OTU_1239	-2.028	9.062	0.0269623	0.109303	Depleted	0	0.01
OTU_1471	-2.028	9.062	0.0269623	0.109303	Depleted	0	0.01
OTU_979	-2.028	9.062	0.0269623	0.109303	Depleted	0	0.01
OTU_1401	-2.087	9.232	0.0271352	0.109735	Depleted	0.003	0.029
OTU_191	-2.056	9.225	0.0272896	0.109875	Depleted	0.003	0.025
OTU_1582	-2.013	9.061	0.0274585	0.109875	Depleted	0	0.01
OTU_1137	-2.013	9.061	0.0274585	0.109875	Depleted	0	0.01
OTU_842	-2.013	9.061	0.0274585	0.109875	Depleted	0	0.01
OTU_1334	-2.068	9.23	0.0275019	0.109875	Depleted	0.003	0.029
OTU_1135	2.782	9.343	0.0276533	0.109972	Enriched	0.018	0
OTU_310	-2.007	9.06	0.0276593	0.109972	Depleted	0	0.01
OTU_1238	2.344	9.666	0.0278614	0.11022	Enriched	0.039	0.007
OTU_1260	-2.136	9.23	0.0278933	0.11022	Depleted	0.003	0.027
OTU_624	-1.626	9.616	0.0279396	0.11022	Depleted	0.017	0.06
OTU_149	-1.634	9.631	0.0280039	0.11022	Depleted	0.017	0.069
OTU_1550	-1.639	9.622	0.0280548	0.11022	Depleted	0.017	0.062
OTU_1192	1.683	10.242	0.0281795	0.110448	Enriched	0.084	0.027
OTU_441	-1.112	11.541	0.0288796	0.112924	Depleted	0.193	0.455
OTU_1489	2.195	9.606	0.0289827	0.112984	Enriched	0.034	0.005
OTU_638	2.13	9.88	0.0290315	0.112984	Enriched	0.052	0.012
OTU_1492	-2.177	9.154	0.0292693	0.113642	Depleted	0.002	0.02
OTU_587	1.978	11.615	0.0293627	0.113737	Enriched	0.319	0.082
OTU_329	2.683	9.32	0.0296633	0.114525	Enriched	0.017	0
OTU_699	-1.355	10.187	0.0297044	0.114525	Depleted	0.046	0.132
OTU_1554	-1.981	9.283	0.0299462	0.115026	Depleted	0.005	0.03
OTU_344	-1.966	9.279	0.0299736	0.115026	Depleted	0.005	0.03
OTU_112	2.976	9.396	0.0303309	0.115698	Enriched	0.022	0
OTU_609	2.777	9.342	0.0303501	0.115698	Enriched	0.018	0
OTU_4	0.982	13.628	0.0303585	0.115698	Enriched	1.36	0.762
OTU_1626	-1.683	9.369	0.0305492	0.116157	Depleted	0.008	0.037
OTU_14	1.227	12.502	0.0306779	0.116379	Enriched	0.61	0.274
OTU_653	2.986	9.398	0.0308283	0.116682	Enriched	0.022	0
OTU_720	-1.299	10.344	0.0311936	0.117795	Depleted	0.056	0.149
OTU_687	-1.855	9.39	0.0314171	0.118342	Depleted	0.008	0.042
OTU_1658	2.529	9.279	0.0315462	0.118342	Enriched	0.015	0
OTU_488	2.379	9.667	0.0315531	0.118342	Enriched	0.038	0.005
OTU_812	2.546	9.287	0.0316362	0.118385	Enriched	0.015	0
OTU_614	1.555	10.576	0.0317866	0.11868	Enriched	0.121	0.04
OTU_719	-1.681	9.49	0.031983	0.119144	Depleted	0.012	0.056
OTU_503	2.784	9.344	0.0321897	0.119644	Enriched	0.018	0
OTU_1114	1.903	9.763	0.0324155	0.120214	Enriched	0.046	0.01
OTU_1037	-1.31	10.506	0.0336363	0.124462	Depleted	0.067	0.193
OTU_154	1.336	12.096	0.0343472	0.126419	Enriched	0.449	0.192
OTU_1659	2.535	9.283	0.0343739	0.126419	Enriched	0.015	0
OTU_1376	2.563	9.293	0.0343946	0.126419	Enriched	0.015	0
OTU_204	2.089	9.84	0.0345839	0.126833	Enriched	0.05	0.01
OTU_1414	2.664	9.314	0.0350362	0.128208	Enriched	0.017	0
OTU_213	1.926	10.222	0.0355359	0.129749	Enriched	0.083	0.022
OTU_1362	-1.648	9.472	0.0357583	0.13009	Depleted	0.013	0.047
OTU_1407	-2.069	9.218	0.0357866	0.13009	Depleted	0.003	0.025
OTU_454	-1.2	10.292	0.0362963	0.130913	Depleted	0.056	0.137
OTU_402	2.551	9.289	0.0364082	0.130913	Enriched	0.015	0
OTU_1050	2.55	9.288	0.0364166	0.130913	Enriched	0.015	0
OTU_1156	2.548	9.288	0.036434	0.130913	Enriched	0.016	0
OTU_1563	2.547	9.287	0.0364462	0.130913	Enriched	0.015	0
OTU_621	2.541	9.285	0.0364878	0.130913	Enriched	0.015	0
OTU_296	2.063	9.561	0.036589	0.130992	Enriched	0.03	0.005
OTU_1592	-2.08	9.228	0.037059	0.132068	Depleted	0.003	0.029
OTU_1449	2.342	9.983	0.0370813	0.132068	Enriched	0.065	0.012
OTU_1132	2.009	9.824	0.037129	0.132068	Enriched	0.048	0.012
OTU_5	-0.853	12.002	0.0374508	0.132684	Depleted	0.3	0.606
OTU_1056	2.661	9.313	0.0374845	0.132684	Enriched	0.017	0
OTU_1044	2.658	9.313	0.0375429	0.132684	Enriched	0.017	0
OTU_675	-1.577	9.837	0.0379255	0.133723	Depleted	0.026	0.087
OTU_1178	-1.372	10.176	0.0379986	0.133723	Depleted	0.045	0.138
OTU_1217	2.121	9.57	0.0382738	0.134405	Enriched	0.033	0.005
OTU_43	-1.468	10.089	0.0389003	0.136316	Depleted	0.038	0.124
OTU_1608	-1.72	9.319	0.039751	0.139003	Depleted	0.007	0.034
OTU_515	-1.647	9.705	0.0399646	0.139455	Depleted	0.02	0.081
OTU_1445	2.656	9.313	0.0402018	0.139758	Enriched	0.017	0
OTU_833	2.767	9.34	0.0402204	0.139758	Enriched	0.02	0
OTU_1634	2.171	9.587	0.0404738	0.140343	Enriched	0.032	0.005
OTU_596	-1.952	9.275	0.041025	0.14167	Depleted	0.005	0.03
OTU_1204	2.966	9.394	0.0410277	0.14167	Enriched	0.022	0
OTU_1483	2.348	9.647	0.0415931	0.143323	Enriched	0.039	0.005
OTU_1343	2.561	9.292	0.042173	0.144478	Enriched	0.015	0
OTU_862	2.394	9.252	0.0423359	0.144478	Enriched	0.013	0
OTU_1534	2.398	9.254	0.042355	0.144478	Enriched	0.013	0
OTU_1172	2.403	9.256	0.0423755	0.144478	Enriched	0.013	0
OTU_748	2.406	9.258	0.042389	0.144478	Enriched	0.014	0
OTU_371	-1.487	9.451	0.04253	0.144478	Depleted	0.012	0.042
OTU_1063	2.543	9.286	0.0425397	0.144478	Enriched	0.015	0
OTU_1032	-1.313	9.916	0.0432558	0.146388	Depleted	0.032	0.089
OTU_1101	-1.489	9.702	0.0432791	0.146388	Depleted	0.02	0.072
OTU_726	-1.29	10.423	0.0433732	0.146407	Depleted	0.062	0.171
OTU_35	1.291	11.225	0.043463	0.146411	Enriched	0.224	0.099
OTU_101	2.08	9.556	0.0444286	0.149359	Enriched	0.031	0.005
OTU_970	2.435	9.267	0.0445796	0.149563	Enriched	0.013	0
OTU_760	-1.478	9.653	0.044739	0.14974	Depleted	0.019	0.062
OTU_717	2.405	9.257	0.0448133	0.14974	Enriched	0.013	0
OTU_1509	2.674	9.317	0.0451768	0.15057	Enriched	0.017	0
OTU_465	2.544	9.287	0.0452438	0.15057	Enriched	0.015	0
OTU_652	-1.163	10.963	0.0454552	0.15097	Depleted	0.11	0.275
OTU_1240	-1.763	9.318	0.0457039	0.151491	Depleted	0.007	0.034
OTU_422	2.348	9.647	0.0460536	0.152345	Enriched	0.037	0.005
OTU_920	-1.426	9.724	0.0464796	0.153211	Depleted	0.022	0.069
OTU_682	1.931	9.77	0.046545	0.153211	Enriched	0.046	0.01
OTU_1003	-1.73	9.261	0.0465933	0.153211	Depleted	0.005	0.025
OTU_458	2.347	9.655	0.0467552	0.153439	Enriched	0.037	0.005
OTU_256	-1.165	10.169	0.0488056	0.15985	Depleted	0.047	0.117
OTU_651	-0.943	11.518	0.0491027	0.160506	Depleted	0.201	0.42
OTU_1128	-1.547	9.606	0.0495235	0.161549	Depleted	0.017	0.066
OTU_708	-1.526	9.452	0.0496171	0.161549	Depleted	0.012	0.044
Apple VS licorice
ID	log2FC	log2CPM	PValue	FDR	level	Mean Apple	Mean Glycyrrhiza
OTU_64	5.881	10.939	4.69835e-08	5.17686e-05	Enriched	0.186	0
OTU_1600	5.838	10.908	6.25981e-08	5.17686e-05	Enriched	0.177	0
OTU_209	4.537	10.987	1.76097e-07	7.52276e-05	Enriched	0.198	0.005
OTU_11	4.202	13.239	1.99054e-07	7.52276e-05	Enriched	1.157	0.064
OTU_996	-3.434	10.231	2.27411e-07	7.52276e-05	Depleted	0.017	0.245
OTU_1424	-4.167	9.382	5.8647e-07	0.00016167	Depleted	0	0.068
OTU_645	3.201	11.575	7.47978e-07	0.000168922	Enriched	0.315	0.034
OTU_342	-3.859	9.631	8.17034e-07	0.000168922	Depleted	0.003	0.105
OTU_1166	-3.564	9.769	9.51994e-07	0.000174955	Depleted	0.007	0.126
OTU_237	-1.973	11.807	3.37922e-06	0.000539388	Depleted	0.169	0.817
OTU_478	-2.377	11.534	3.58722e-06	0.000539388	Depleted	0.115	0.709
OTU_47	2.767	12.671	4.62077e-06	0.000636896	Enriched	0.743	0.112
OTU_124	2.612	11.896	5.42508e-06	0.000690237	Enriched	0.402	0.075
OTU_1186	-3.959	9.333	6.3325e-06	0.000718124	Depleted	0	0.052
OTU_79	5.488	10.658	6.51261e-06	0.000718124	Enriched	0.144	0
OTU_499	-2.876	10.199	7.46611e-06	0.00077181	Depleted	0.022	0.206
OTU_1	11.656	16.291	9.24294e-06	0.000853062	Enriched	7.47	0
OTU_9	2.173	13.559	9.78387e-06	0.000853062	Enriched	1.398	0.368
OTU_193	5.578	10.72	9.79939e-06	0.000853062	Enriched	0.148	0
OTU_277	-2.565	10.314	1.33786e-05	0.00110641	Depleted	0.03	0.23
OTU_32	3.925	12.161	2.05467e-05	0.0016183	Enriched	0.517	0.034
OTU_253	4.592	10.103	2.41387e-05	0.00181479	Enriched	0.074	0
OTU_164	3.119	11.879	2.57431e-05	0.00181854	Enriched	0.416	0.055
OTU_100	-2.024	13.407	2.63875e-05	0.00181854	Depleted	0.568	2.747
OTU_711	5.481	10.655	2.80936e-05	0.00185867	Enriched	0.142	0
OTU_317	4.844	10.246	3.76459e-05	0.00239486	Enriched	0.093	0
OTU_230	3.51	11.129	4.08781e-05	0.00250416	Enriched	0.218	0.019
OTU_397	2.823	12.194	6.37434e-05	0.00376541	Enriched	0.508	0.083
OTU_132	2.647	11.763	7.07776e-05	0.00403676	Enriched	0.356	0.068
OTU_141	5.652	10.771	7.3694e-05	0.004063	Enriched	0.153	0
OTU_368	3.75	10.472	7.66675e-05	0.00409058	Enriched	0.112	0.009
OTU_1052	4.619	10.118	7.95154e-05	0.00410995	Enriched	0.075	0
OTU_1224	4.561	10.087	8.52013e-05	0.00427039	Enriched	0.073	0
OTU_105	5.302	10.533	0.0001052	0.00511766	Enriched	0.122	0
OTU_1522	3.66	10.39	0.0001247	0.00578676	Enriched	0.102	0.005
OTU_307	-2.699	9.999	0.000125951	0.00578676	Depleted	0.018	0.163
OTU_1311	-3.41	9.24	0.000139648	0.00624263	Depleted	0	0.034
OTU_123	4.684	10.155	0.000144807	0.00630293	Enriched	0.08	0
OTU_1262	-2.265	10.276	0.000166336	0.00690954	Depleted	0.033	0.209
OTU_437	-2.609	10.373	0.000167099	0.00690954	Depleted	0.032	0.233
OTU_152	3.073	12.051	0.000195584	0.00789015	Enriched	0.461	0.061
OTU_174	3.601	10.353	0.000224554	0.00884313	Enriched	0.099	0.005
OTU_543	2.976	10.447	0.000251394	0.0096699	Enriched	0.109	0.017
OTU_300	4.307	9.955	0.000263569	0.00985607	Enriched	0.06	0
OTU_312	-2.257	10.662	0.000271222	0.00985607	Depleted	0.054	0.294
OTU_520	4.117	9.866	0.000274111	0.00985607	Enriched	0.052	0
OTU_374	4.737	10.187	0.000290501	0.0101232	Enriched	0.084	0
OTU_705	2.473	10.808	0.000297095	0.0101232	Enriched	0.156	0.025
OTU_306	2.78	11.093	0.000302039	0.0101232	Enriched	0.203	0.032
OTU_726	-2.127	10.745	0.000310035	0.0101232	Depleted	0.062	0.327
OTU_150	2.729	11.237	0.000312142	0.0101232	Enriched	0.23	0.041
OTU_198	-2.27	10.262	0.000323241	0.0102815	Depleted	0.034	0.192
OTU_796	-1.854	10.979	0.000349899	0.0109195	Depleted	0.088	0.379
OTU_1646	3.083	10.5	0.000358922	0.0109937	Enriched	0.114	0.014
OTU_873	5.183	10.454	0.000375267	0.0112853	Enriched	0.11	0
OTU_85	1.894	12.412	0.000427098	0.0122811	Enriched	0.588	0.179
OTU_153	3.386	10.651	0.000427363	0.0122811	Enriched	0.137	0.01
OTU_1442	-2.22	9.843	0.000430654	0.0122811	Depleted	0.019	0.119
OTU_338	-2.956	9.585	0.000467392	0.0129804	Depleted	0.007	0.079
OTU_95	2.836	10.641	0.000470873	0.0129804	Enriched	0.135	0.019
OTU_278	2.403	11.217	0.000541629	0.0146861	Enriched	0.227	0.04
OTU_407	4.031	9.828	0.000554585	0.0147949	Enriched	0.049	0
OTU_809	4.262	9.935	0.000587308	0.0154192	Enriched	0.057	0
OTU_648	-2.055	10.221	0.000661721	0.0169826	Depleted	0.035	0.185
OTU_483	2.516	11.602	0.000667395	0.0169826	Enriched	0.312	0.061
OTU_303	-3.161	9.208	0.000692543	0.017178	Depleted	0	0.029
OTU_26	2.908	10.996	0.000695846	0.017178	Enriched	0.187	0.031
OTU_405	4.453	10.032	0.000738911	0.017792	Enriched	0.067	0
OTU_1563	-2.327	9.767	0.000742229	0.017792	Depleted	0.015	0.103
OTU_325	-1.924	11.32	0.000790102	0.018669	Depleted	0.114	0.523
OTU_1156	-2.542	9.837	0.00080814	0.0188263	Depleted	0.016	0.11
OTU_176	-1.555	12.613	0.000840517	0.0193086	Depleted	0.377	1.298
OTU_1258	3.958	9.792	0.000898885	0.0203665	Enriched	0.047	0
OTU_1080	2.729	10.803	0.000918313	0.0205255	Enriched	0.158	0.024
OTU_1465	-2.402	9.718	0.000989328	0.0216642	Depleted	0.013	0.098
OTU_15	3.341	10.192	0.000995451	0.0216642	Enriched	0.084	0.005
OTU_438	1.922	11.844	0.00102735	0.0218795	Enriched	0.375	0.106
OTU_887	-2.84	9.278	0.00104465	0.0218795	Depleted	0.002	0.037
OTU_617	2.784	10.6	0.00104813	0.0218795	Enriched	0.129	0.019
OTU_538	4.07	9.845	0.00106938	0.0218795	Enriched	0.05	0
OTU_1598	-2.867	9.383	0.00107149	0.0218795	Depleted	0.004	0.058
OTU_699	-1.995	10.416	0.00110923	0.022374	Depleted	0.046	0.218
OTU_128	-1.913	10.715	0.00113409	0.0225998	Depleted	0.066	0.297
OTU_1550	-2.236	9.795	0.00115508	0.0226437	Depleted	0.017	0.101
OTU_267	-2.251	9.805	0.00116367	0.0226437	Depleted	0.017	0.101
OTU_125	4.786	10.215	0.00121187	0.0230562	Enriched	0.085	0
OTU_956	3.983	9.806	0.00121275	0.0230562	Enriched	0.047	0
OTU_546	3.87	9.756	0.00125985	0.0236794	Enriched	0.043	0
OTU_1365	-2.41	9.784	0.00130182	0.0241934	Depleted	0.015	0.102
OTU_1515	2.938	10.705	0.00132146	0.0242856	Enriched	0.142	0.019
OTU_1013	-2.592	9.503	0.0013714	0.0247661	Depleted	0.007	0.062
OTU_285	3.839	9.746	0.00137756	0.0247661	Enriched	0.042	0
OTU_218	2.14	11.08	0.00141344	0.025138	Enriched	0.192	0.047
OTU_254	4.642	10.134	0.00148687	0.0261626	Enriched	0.077	0
OTU_1092	3.416	10.231	0.00152676	0.0265818	Enriched	0.085	0.005
OTU_24	3.669	9.68	0.00166673	0.0287163	Enriched	0.038	0
OTU_549	4.412	10.012	0.00175316	0.029894	Enriched	0.065	0
OTU_921	-2.146	9.721	0.00180008	0.030381	Depleted	0.015	0.09
OTU_265	4.87	10.26	0.00185397	0.0309102	Enriched	0.087	0
OTU_875	3.661	9.674	0.00186882	0.0309102	Enriched	0.037	0
OTU_347	-2.279	10.095	0.00189682	0.0310628	Depleted	0.027	0.149
OTU_1127	3.706	9.689	0.00197068	0.0319559	Enriched	0.039	0
OTU_113	1.811	11.78	0.0020012	0.0320234	Enriched	0.352	0.11
OTU_30	3.596	9.649	0.00201356	0.0320234	Enriched	0.036	0
OTU_1355	-2.523	9.483	0.00213248	0.0334796	Depleted	0.007	0.055
OTU_951	-2.919	9.181	0.00218257	0.0334796	Depleted	0	0.024
OTU_1317	-2.916	9.181	0.00220123	0.0334796	Depleted	0	0.024
OTU_1299	2.135	10.744	0.00221292	0.0334796	Enriched	0.145	0.03
OTU_1461	-2.912	9.18	0.00221861	0.0334796	Depleted	0	0.024
OTU_333	1.792	12.314	0.00222658	0.0334796	Enriched	0.542	0.182
OTU_136	2.396	11.68	0.00233112	0.0347357	Enriched	0.337	0.067
OTU_1639	2.485	10.392	0.0023783	0.0351224	Enriched	0.103	0.015
OTU_349	-1.982	9.92	0.00241929	0.0354116	Depleted	0.024	0.125
OTU_691	-2.85	9.173	0.00250278	0.0363122	Depleted	0	0.02
OTU_1505	-2.831	9.171	0.00260306	0.0372327	Depleted	0	0.02
OTU_445	3.89	9.766	0.00261124	0.0372327	Enriched	0.043	0
OTU_175	-2.16	9.778	0.00270085	0.0381813	Depleted	0.017	0.096
OTU_155	2.514	10.432	0.00273363	0.0383172	Enriched	0.105	0.019
OTU_786	-1.966	9.869	0.00279794	0.038889	Depleted	0.022	0.108
OTU_415	-2.398	9.597	0.00287974	0.0396026	Depleted	0.01	0.076
OTU_38	1.728	11.965	0.00289717	0.0396026	Enriched	0.406	0.141
OTU_695	4.034	9.827	0.003081	0.0417703	Enriched	0.047	0
OTU_373	3.025	10.032	0.00312139	0.0419739	Enriched	0.066	0.005
OTU_309	-2.611	9.42	0.00320859	0.0427641	Depleted	0.005	0.052
OTU_324	3.27	10.149	0.00323187	0.0427641	Enriched	0.083	0.005
OTU_215	-1.563	10.633	0.00330929	0.043441	Depleted	0.07	0.244
OTU_450	2.044	10.721	0.00336206	0.0437862	Enriched	0.145	0.037
OTU_1088	2.961	10.001	0.00339147	0.0438241	Enriched	0.063	0.005
OTU_766	-2.148	9.758	0.0038765	0.0497034	Depleted	0.018	0.098
OTU_10	-1.417	12.622	0.0039716	0.050531	Depleted	0.399	1.236
OTU_172	3.118	10.079	0.00404154	0.0510283	Enriched	0.07	0.005
OTU_749	-2.295	9.575	0.00411348	0.0515431	Depleted	0.01	0.071
OTU_385	3.755	9.71	0.00417291	0.0517429	Enriched	0.04	0
OTU_754	3.524	9.621	0.00419199	0.0517429	Enriched	0.033	0
OTU_1592	-2.66	9.349	0.00429565	0.0526297	Depleted	0.003	0.05
OTU_1406	3.701	9.689	0.00439646	0.0534687	Enriched	0.038	0
OTU_1292	3.44	9.589	0.00443999	0.053604	Enriched	0.032	0
OTU_700	3.632	9.664	0.00456631	0.0547296	Enriched	0.036	0
OTU_548	-1.86	11.257	0.00469667	0.0557479	Depleted	0.112	0.47
OTU_287	-2.522	9.405	0.00478574	0.0557479	Depleted	0.005	0.045
OTU_23	1.647	11.819	0.00481739	0.0557479	Enriched	0.358	0.132
OTU_672	-2.291	9.573	0.00485505	0.0557479	Depleted	0.01	0.067
OTU_1634	3.479	9.608	0.00485682	0.0557479	Enriched	0.032	0
OTU_1530	3.4	9.58	0.00488364	0.0557479	Enriched	0.031	0
OTU_1319	3.315	9.549	0.00488721	0.0557479	Enriched	0.029	0
OTU_490	3.62	9.659	0.00513078	0.0581254	Enriched	0.035	0
OTU_101	3.394	9.577	0.00517405	0.0582169	Enriched	0.031	0
OTU_196	-1.692	10.249	0.00533479	0.0596199	Depleted	0.042	0.162
OTU_321	2.174	10.663	0.00543002	0.0599181	Enriched	0.134	0.032
OTU_1483	3.649	9.669	0.00543393	0.0599181	Enriched	0.039	0
OTU_211	1.625	11.472	0.00555588	0.0608571	Enriched	0.273	0.092
OTU_602	2.958	10.393	0.00584364	0.062668	Enriched	0.1	0.01
OTU_298	-2.649	9.157	0.00592054	0.062668	Depleted	0	0.022
OTU_428	3.467	9.602	0.00592397	0.062668	Enriched	0.032	0
OTU_304	3.867	9.757	0.00594718	0.062668	Enriched	0.043	0
OTU_572	-2.411	9.309	0.0060142	0.062668	Depleted	0.003	0.037
OTU_508	-1.511	10.568	0.0060212	0.062668	Depleted	0.065	0.222
OTU_76	-1.647	12.19	0.0060432	0.062668	Depleted	0.263	0.954
OTU_1331	3.531	9.625	0.00606108	0.062668	Enriched	0.036	0
OTU_824	-2.635	9.155	0.0060622	0.062668	Depleted	0	0.022
OTU_360	-1.847	9.927	0.00628331	0.0644802	Depleted	0.025	0.113
OTU_859	3.525	9.623	0.00631548	0.0644802	Enriched	0.034	0
OTU_248	1.649	11.301	0.00641252	0.0649407	Enriched	0.236	0.081
OTU_795	-2.157	9.542	0.0064391	0.0649407	Depleted	0.01	0.062
OTU_557	-1.963	9.621	0.00662828	0.0658931	Depleted	0.013	0.067
OTU_414	-2.539	9.235	0.0066691	0.0658931	Depleted	0.002	0.025
OTU_571	3.867	9.757	0.00672707	0.0658931	Enriched	0.044	0
OTU_364	3.83	9.741	0.00676505	0.0658931	Enriched	0.042	0
OTU_1322	-2.567	9.148	0.00677875	0.0658931	Depleted	0	0.019
OTU_301	2.912	9.977	0.00685798	0.0658931	Enriched	0.059	0.005
OTU_636	3.304	9.544	0.00687292	0.0658931	Enriched	0.028	0
OTU_1612	-2.558	9.147	0.00687916	0.0658931	Depleted	0	0.019
OTU_733	3.161	9.502	0.00690653	0.0658931	Enriched	0.025	0
OTU_447	2.016	10.359	0.00693192	0.0658931	Enriched	0.095	0.024
OTU_19	-1.612	12.005	0.00731977	0.0691823	Depleted	0.23	0.81
OTU_1273	-2.503	9.141	0.00749812	0.0704653	Depleted	0	0.015
OTU_1372	-2.115	9.662	0.00761663	0.0710581	Depleted	0.013	0.074
OTU_1200	-2.087	9.655	0.00764713	0.0710581	Depleted	0.013	0.076
OTU_1496	3.318	9.551	0.00787251	0.0726935	Enriched	0.029	0
OTU_97	3.162	9.503	0.00791102	0.0726935	Enriched	0.025	0
OTU_1458	-1.766	9.784	0.00798837	0.0729987	Depleted	0.02	0.086
OTU_139	3.332	9.557	0.00821427	0.0746506	Enriched	0.028	0
OTU_631	-2.102	9.47	0.00838261	0.0757642	Depleted	0.009	0.052
OTU_514	3.34	9.56	0.0084665	0.0761065	Enriched	0.029	0
OTU_1282	3.717	9.695	0.00855516	0.076418	Enriched	0.041	0
OTU_66	1.372	12.121	0.00863971	0.076418	Enriched	0.453	0.202
OTU_346	3.684	9.684	0.00863976	0.076418	Enriched	0.039	0
OTU_532	3.21	9.512	0.00873798	0.0766296	Enriched	0.027	0
OTU_157	-1.659	10.321	0.00884438	0.0766296	Depleted	0.047	0.188
OTU_1159	-2.256	9.431	0.00886127	0.0766296	Depleted	0.007	0.045
OTU_130	3.374	9.569	0.00898675	0.0766296	Enriched	0.03	0
OTU_58	1.349	11.438	0.00902741	0.0766296	Enriched	0.259	0.113
OTU_1279	3.066	9.472	0.00904064	0.0766296	Enriched	0.024	0
OTU_1180	3.239	9.525	0.00906066	0.0766296	Enriched	0.027	0
OTU_1427	2.573	10.194	0.00911097	0.0766296	Enriched	0.079	0.014
OTU_913	-2.028	9.578	0.00911767	0.0766296	Depleted	0.013	0.066
OTU_1248	3.136	9.489	0.00912698	0.0766296	Enriched	0.025	0
OTU_43	-1.803	10.216	0.00919654	0.0768237	Depleted	0.038	0.162
OTU_1470	3.465	9.601	0.00927739	0.0769327	Enriched	0.032	0
OTU_474	3.239	9.526	0.00930263	0.0769327	Enriched	0.027	0
OTU_1041	2.978	9.45	0.00954772	0.0785668	Enriched	0.022	0
OTU_1164	3.367	9.567	0.00971551	0.0795517	Enriched	0.032	0
OTU_151	2.153	10.779	0.0100293	0.0817162	Enriched	0.157	0.034
OTU_894	-2.433	9.311	0.0101616	0.082389	Depleted	0.003	0.037
OTU_876	2.489	9.798	0.0104423	0.0842512	Enriched	0.045	0.009
OTU_116	1.576	11.419	0.0108735	0.087305	Enriched	0.265	0.098
OTU_855	3.436	9.591	0.0110749	0.0884922	Enriched	0.032	0
OTU_588	2.41	10.074	0.0113944	0.0902027	Enriched	0.067	0.01
OTU_271	1.74	10.804	0.011398	0.0902027	Enriched	0.15	0.047
OTU_1422	2.558	10.196	0.0118505	0.0929919	Enriched	0.08	0.014
OTU_736	-1.829	10.055	0.0119416	0.0929919	Depleted	0.03	0.133
OTU_217	-1.655	9.885	0.011969	0.0929919	Depleted	0.026	0.092
OTU_587	-1.691	12.464	0.0119754	0.0929919	Depleted	0.319	1.196
OTU_345	1.496	11.098	0.012316	0.0951903	Enriched	0.193	0.086
OTU_5	1.282	11.597	0.0124528	0.095544	Enriched	0.3	0.133
OTU_318	2.263	10.014	0.0124773	0.095544	Enriched	0.06	0.01
OTU_1312	2.969	9.443	0.0125878	0.0959461	Enriched	0.022	0
OTU_620	2.479	10.113	0.0127881	0.097025	Enriched	0.072	0.01
OTU_577	2.747	9.889	0.0128911	0.0973119	Enriched	0.053	0.005
OTU_118	1.304	11.943	0.0129435	0.0973119	Enriched	0.389	0.179
OTU_192	1.611	12.512	0.0130403	0.0975957	Enriched	0.637	0.22
OTU_1561	3.064	9.471	0.0135307	0.100538	Enriched	0.023	0
OTU_621	-1.898	9.661	0.0135882	0.100538	Depleted	0.015	0.072
OTU_286	-1.288	11.033	0.0136395	0.100538	Depleted	0.112	0.307
OTU_1113	-1.63	9.837	0.0136766	0.100538	Depleted	0.024	0.093
OTU_228	-2.096	9.475	0.0142126	0.104016	Depleted	0.008	0.052
OTU_394	3.421	9.587	0.0143226	0.10436	Enriched	0.032	0
OTU_457	3.223	9.52	0.0144937	0.105143	Enriched	0.028	0
OTU_356	-2.003	9.39	0.0147621	0.106622	Depleted	0.007	0.042
OTU_107	1.111	12.786	0.0150089	0.107523	Enriched	0.738	0.385
OTU_464	2.164	9.981	0.0150168	0.107523	Enriched	0.059	0.014
OTU_836	-2.124	9.414	0.0151622	0.108096	Depleted	0.007	0.044
OTU_251	2.3	10.049	0.0155737	0.110213	Enriched	0.065	0.014
OTU_167	-1.671	9.795	0.0155924	0.110213	Depleted	0.022	0.086
OTU_529	2.954	9.437	0.0157005	0.110505	Enriched	0.022	0
OTU_1379	-2.171	9.28	0.0158206	0.110878	Depleted	0.003	0.032
OTU_115	1.266	11.796	0.0158961	0.110937	Enriched	0.346	0.164
OTU_421	-1.167	11.176	0.0161557	0.112275	Depleted	0.133	0.351
OTU_640	2.978	9.448	0.0165186	0.113737	Enriched	0.022	0
OTU_757	-2.185	9.489	0.0165243	0.113737	Depleted	0.008	0.05
OTU_738	3.007	10.004	0.0165723	0.113737	Enriched	0.062	0.005
OTU_61	1.74	10.921	0.016848	0.115151	Enriched	0.168	0.056
OTU_187	1.812	10.247	0.0171169	0.116332	Enriched	0.082	0.024
OTU_439	-2.309	9.213	0.0172312	0.116332	Depleted	0.002	0.024
OTU_375	1.551	10.63	0.0172318	0.116332	Enriched	0.125	0.04
OTU_210	2.272	10.02	0.0173647	0.116576	Enriched	0.062	0.01
OTU_861	2.982	9.449	0.0174089	0.116576	Enriched	0.022	0
OTU_1575	2.859	9.411	0.0175551	0.117081	Enriched	0.021	0
OTU_369	2.29	9.723	0.0177287	0.117764	Enriched	0.039	0.009
OTU_119	-1.279	10.548	0.0178722	0.118243	Depleted	0.07	0.192
OTU_773	2.817	9.916	0.0180899	0.118828	Enriched	0.055	0.005
OTU_661	1.587	10.433	0.0181044	0.118828	Enriched	0.1	0.034
OTU_982	2.769	9.392	0.0181877	0.118903	Enriched	0.018	0
OTU_102	-1.405	11.5	0.0184754	0.120308	Depleted	0.163	0.507
OTU_184	-1.519	10.201	0.0186026	0.120662	Depleted	0.042	0.146
OTU_768	2.97	9.445	0.0188643	0.121881	Enriched	0.022	0
OTU_708	-1.741	9.521	0.0192151	0.123314	Depleted	0.012	0.052
OTU_1006	3.065	9.472	0.0192352	0.123314	Enriched	0.023	0
OTU_1174	1.596	11.209	0.0193251	0.123412	Enriched	0.218	0.074
OTU_788	-2.268	9.296	0.0198576	0.12615	Depleted	0.003	0.04
OTU_477	1.456	11.051	0.0199063	0.12615	Enriched	0.185	0.069
OTU_1131	2.706	9.866	0.0199916	0.126206	Enriched	0.05	0.005
OTU_18	1.124	12.199	0.0200872	0.126328	Enriched	0.469	0.245
OTU_72	1.068	12.306	0.0202142	0.126645	Enriched	0.506	0.281
OTU_1250	3.215	9.519	0.0211345	0.131911	Enriched	0.027	0
OTU_1544	2.878	9.42	0.0218651	0.135655	Enriched	0.02	0
OTU_1179	-2.107	9.269	0.0218983	0.135655	Depleted	0.003	0.025
OTU_1513	-1.851	9.601	0.0221711	0.136284	Depleted	0.014	0.062
OTU_299	-1.843	9.82	0.0222108	0.136284	Depleted	0.022	0.104
OTU_798	3.5	9.612	0.0222471	0.136284	Enriched	0.032	0
OTU_384	-1.63	9.917	0.022405	0.136466	Depleted	0.027	0.107
OTU_656	-1.919	9.389	0.0224418	0.136466	Depleted	0.007	0.035
OTU_1599	-2.144	9.118	0.0225606	0.136686	Depleted	0	0.014
OTU_1305	-2.139	9.117	0.0227012	0.13686	Depleted	0	0.014
OTU_1007	2.304	10.051	0.0227548	0.13686	Enriched	0.066	0.014
OTU_933	2.254	9.685	0.0229845	0.137089	Enriched	0.037	0.005
OTU_1364	-2.123	9.116	0.0231469	0.137089	Depleted	0	0.014
OTU_1521	-2.124	9.116	0.0231478	0.137089	Depleted	0	0.014
OTU_728	-1.501	10.131	0.0231928	0.137089	Depleted	0.039	0.142
OTU_630	2.959	9.442	0.0232086	0.137089	Enriched	0.023	0
OTU_1268	-2.118	9.116	0.0232902	0.137089	Depleted	0	0.014
OTU_714	2.508	9.793	0.0235507	0.138017	Enriched	0.043	0.005
OTU_46	1.462	11.839	0.0236147	0.138017	Enriched	0.365	0.151
OTU_223	1.482	11.133	0.0239387	0.139126	Enriched	0.205	0.083
OTU_1019	-2.082	9.112	0.0242436	0.139126	Depleted	0	0.01
OTU_985	-2.082	9.112	0.0242436	0.139126	Depleted	0	0.01
OTU_1340	-2.082	9.112	0.0242436	0.139126	Depleted	0	0.01
OTU_1596	-2.082	9.112	0.0242436	0.139126	Depleted	0	0.01
OTU_781	-2.332	9.214	0.02434	0.139126	Depleted	0.002	0.024
OTU_948	-2.067	9.11	0.0247032	0.139126	Depleted	0	0.01
OTU_1361	-2.067	9.11	0.0247032	0.139126	Depleted	0	0.01
OTU_412	-2.062	9.11	0.024851	0.139126	Depleted	0	0.01
OTU_1093	-2.062	9.11	0.024851	0.139126	Depleted	0	0.01
OTU_842	-2.051	9.109	0.025167	0.139126	Depleted	0	0.01
OTU_1635	-2.051	9.109	0.025167	0.139126	Depleted	0	0.01
OTU_611	1.414	10.705	0.0251957	0.139126	Enriched	0.131	0.056
OTU_709	-1.98	9.398	0.0252348	0.139126	Depleted	0.007	0.042
OTU_1134	-2.047	9.108	0.0253161	0.139126	Depleted	0	0.01
OTU_1603	-2.047	9.108	0.0253161	0.139126	Depleted	0	0.01
OTU_430	-2.042	9.108	0.0254657	0.139126	Depleted	0	0.01
OTU_1472	-2.042	9.108	0.0254657	0.139126	Depleted	0	0.01
OTU_1466	-1.557	9.956	0.0254675	0.139126	Depleted	0.03	0.108
OTU_252	-1.452	10.237	0.0254869	0.139126	Depleted	0.046	0.151
OTU_381	2.469	9.767	0.0256865	0.139559	Enriched	0.042	0.005
OTU_482	2.869	9.417	0.0257348	0.139559	Enriched	0.02	0
OTU_823	1.808	10.033	0.0262108	0.141675	Enriched	0.063	0.015
OTU_1121	2.391	9.738	0.0265279	0.142922	Enriched	0.04	0.005
OTU_1193	2.76	9.389	0.0267746	0.143187	Enriched	0.018	0
OTU_137	1.303	11.188	0.0267835	0.143187	Enriched	0.207	0.101
OTU_1300	-2.068	9.333	0.0268726	0.143187	Depleted	0.005	0.034
OTU_446	-1.719	9.625	0.0269535	0.143187	Depleted	0.016	0.076
OTU_199	1.54	10.723	0.0270485	0.143187	Enriched	0.137	0.058
OTU_1318	-1.72	9.667	0.0270965	0.143187	Depleted	0.017	0.071
OTU_605	-1.596	9.652	0.0277719	0.146289	Depleted	0.017	0.066
OTU_920	-1.508	9.773	0.0280847	0.147467	Depleted	0.022	0.08
OTU_1651	2.746	9.384	0.0285596	0.149486	Enriched	0.018	0
OTU_388	2.64	9.358	0.0286838	0.149662	Enriched	0.017	0
OTU_1620	2.214	9.674	0.0300615	0.155664	Enriched	0.035	0.005
OTU_69	-1.024	11.543	0.03012	0.155664	Depleted	0.191	0.451
OTU_186	-1.112	11.091	0.0301431	0.155664	Depleted	0.125	0.329
OTU_635	2.273	9.691	0.0302105	0.155664	Enriched	0.037	0.005
OTU_988	2.642	9.359	0.0303873	0.156089	Enriched	0.017	0
OTU_1135	2.758	9.389	0.0318573	0.162749	Enriched	0.018	0
OTU_106	1.644	10.504	0.0318807	0.162749	Enriched	0.11	0.041
OTU_1337	1.795	10.236	0.0320535	0.163128	Enriched	0.08	0.024
OTU_523	-2.328	9.301	0.032317	0.163964	Depleted	0.003	0.03
OTU_530	1.666	10.325	0.0325795	0.164567	Enriched	0.089	0.029
OTU_475	2.071	9.623	0.0326349	0.164567	Enriched	0.032	0.005
OTU_1549	1.88	10.627	0.0330497	0.166153	Enriched	0.126	0.037
OTU_112	2.951	9.441	0.0335115	0.167963	Enriched	0.022	0
OTU_653	2.961	9.443	0.0337528	0.168391	Enriched	0.022	0
OTU_168	-0.916	12.355	0.0338003	0.168391	Depleted	0.383	0.836
OTU_378	1.66	10.441	0.0341889	0.169815	Enriched	0.103	0.03
OTU_912	-1.601	9.508	0.0343074	0.169894	Depleted	0.012	0.051
OTU_329	2.658	9.366	0.0345163	0.170418	Enriched	0.017	0
OTU_1671	2.64	9.359	0.0347377	0.170625	Enriched	0.017	0
OTU_213	1.898	10.256	0.0347646	0.170625	Enriched	0.083	0.02
OTU_856	-2.148	9.47	0.0350432	0.171484	Depleted	0.008	0.062
OTU_511	2.127	9.645	0.0355266	0.173336	Enriched	0.034	0.005
OTU_180	1.109	11.373	0.0360714	0.175477	Enriched	0.242	0.123
OTU_965	1.694	10.162	0.036318	0.175707	Enriched	0.072	0.02
OTU_503	2.76	9.39	0.0363311	0.175707	Enriched	0.018	0
OTU_17	-1.493	12.3	0.0367429	0.17696	Depleted	0.305	0.978
OTU_1303	1.763	9.8	0.0368043	0.17696	Enriched	0.044	0.014
OTU_692	-1.715	9.859	0.0371078	0.177902	Depleted	0.023	0.092
OTU_1307	2.638	9.359	0.0372243	0.177945	Enriched	0.017	0
OTU_37	1.631	10.421	0.0374605	0.177987	Enriched	0.101	0.03
OTU_812	2.522	9.333	0.0375135	0.177987	Enriched	0.015	0
OTU_1658	2.505	9.326	0.037556	0.177987	Enriched	0.015	0
OTU_352	2.126	9.975	0.0379495	0.179338	Enriched	0.059	0.014
OTU_614	1.493	10.61	0.0382034	0.179537	Enriched	0.121	0.044
OTU_390	2.258	9.716	0.0382086	0.179537	Enriched	0.039	0.009
OTU_156	1.775	10.656	0.0388234	0.181909	Enriched	0.135	0.039
OTU_350	1.768	10.006	0.0394476	0.183695	Enriched	0.061	0.015
OTU_505	-1.405	9.969	0.0394642	0.183695	Depleted	0.032	0.097
OTU_746	-1.586	9.448	0.039615	0.183695	Depleted	0.01	0.042
OTU_461	1.862	9.844	0.0399335	0.183695	Enriched	0.047	0.014
OTU_35	1.346	11.248	0.0399726	0.183695	Enriched	0.224	0.098
OTU_1414	2.64	9.36	0.0399771	0.183695	Enriched	0.017	0
OTU_1167	-1.88	9.243	0.039982	0.183695	Depleted	0.003	0.024
OTU_1659	2.511	9.329	0.0403991	0.185097	Enriched	0.015	0
OTU_393	2.435	9.75	0.0406312	0.185601	Enriched	0.042	0.005
OTU_1128	-1.568	9.644	0.0407335	0.185601	Depleted	0.017	0.062
OTU_1050	2.526	9.334	0.0423473	0.191906	Enriched	0.015	0
OTU_376	-1.386	9.922	0.04239	0.191906	Depleted	0.03	0.104
OTU_1056	2.637	9.359	0.0424653	0.191906	Enriched	0.017	0
OTU_165	1.038	12.286	0.0427206	0.192534	Enriched	0.505	0.282
OTU_1182	-1.868	9.309	0.0435087	0.195446	Depleted	0.005	0.032
OTU_1204	2.941	9.439	0.0436031	0.195446	Enriched	0.022	0
OTU_334	1.732	9.797	0.043886	0.196135	Enriched	0.042	0.014
OTU_865	1.342	10.989	0.044153	0.196135	Enriched	0.178	0.072
OTU_103	-1.884	9.318	0.0441772	0.196135	Depleted	0.005	0.036
OTU_833	2.743	9.386	0.0442313	0.196135	Enriched	0.02	0
OTU_1448	-1.479	9.58	0.0447927	0.197567	Depleted	0.016	0.056
OTU_418	2.538	9.338	0.044793	0.197567	Enriched	0.015	0
OTU_1445	2.632	9.358	0.0452273	0.19894	Enriched	0.017	0
OTU_75	-1.009	11.214	0.0453448	0.19894	Depleted	0.145	0.341
Apple VS Sandy waste soil	log2FC	log2CPM	PValue	FDR	level	Mean Apple	Mean Sandy waste soil
ID	3.657	10.628	6.93512e-13	1.14707e-09	Enriched	0.198	0.014
OTU_209	4.431	10.061	4.12476e-11	3.41117e-08	Enriched	0.102	0.002
OTU_1522	3.409	10.664	8.42375e-11	4.36655e-08	Enriched	0.192	0.018
OTU_218	4.952	10.351	1.056e-10	4.36655e-08	Enriched	0.148	0.002
OTU_193	3.441	10.604	1.42617e-10	4.71778e-08	Enriched	0.186	0.015
OTU_64	5.646	10.386	3.47645e-10	9.58342e-08	Enriched	0.153	0
OTU_141	2.689	11.351	6.99074e-10	1.65181e-07	Enriched	0.352	0.056
OTU_113	5.295	10.181	9.61908e-10	1.98874e-07	Enriched	0.122	0
OTU_105	3.278	10.373	1.47124e-09	2.70382e-07	Enriched	0.145	0.012
OTU_1299	4.068	10.322	3.14088e-09	5.19501e-07	Enriched	0.144	0.005
OTU_79	5.177	10.114	2.22219e-08	3.34137e-06	Enriched	0.11	0
OTU_873	4.446	9.768	1.56401e-07	2.15572e-05	Enriched	0.067	0
OTU_405	2.59	11.682	2.42242e-07	3.08207e-05	Enriched	0.461	0.076
OTU_152	2.847	10.476	2.94796e-07	3.48281e-05	Enriched	0.158	0.02
OTU_1080	1.933	11.526	4.20517e-07	4.6369e-05	Enriched	0.375	0.1
OTU_438	4.779	9.917	4.53886e-07	4.69204e-05	Enriched	0.085	0
OTU_125	2.661	12.858	6.23506e-07	6.06635e-05	Enriched	1.157	0.182
OTU_11	4.635	9.851	8.17411e-07	7.5111e-05	Enriched	0.077	0
OTU_254	4.404	9.752	1.2544e-06	0.000109199	Enriched	0.065	0
OTU_549	2.803	10.356	2.12481e-06	0.000175722	Enriched	0.137	0.017
OTU_153	1.889	11.619	2.7562e-06	0.000217084	Enriched	0.402	0.111
OTU_124	1.848	11.161	4.49048e-06	0.000337602	Enriched	0.273	0.076
OTU_211	3.517	9.451	8.62581e-06	0.000620308	Enriched	0.033	0
OTU_754	3.694	9.502	1.06828e-05	0.000691126	Enriched	0.038	0
OTU_1406	-2.298	10.442	1.07164e-05	0.000691126	Depleted	0.027	0.15
OTU_347	2.04	11.308	1.08882e-05	0.000691126	Enriched	0.312	0.077
OTU_483	2.078	10.88	1.1282e-05	0.000691126	Enriched	0.218	0.052
OTU_230	2.506	10.422	1.45533e-05	0.000859682	Enriched	0.142	0.024
OTU_1515	2.119	10.929	1.63644e-05	0.000933336	Enriched	0.227	0.052
OTU_278	2.794	9.938	2.36227e-05	0.00128876	Enriched	0.079	0.01
OTU_1427	3.519	9.452	2.42415e-05	0.00128876	Enriched	0.034	0
OTU_859	-1.596	11.989	2.55041e-05	0.00128876	Depleted	0.169	0.586
OTU_237	3.86	9.554	2.57129e-05	0.00128876	Enriched	0.043	0
OTU_304	3.568	9.677	3.0161e-05	0.00145344	Enriched	0.055	0.002
OTU_773	1.939	10.529	3.07559e-05	0.00145344	Enriched	0.15	0.038
OTU_271	3.86	9.554	3.3096e-05	0.00151473	Enriched	0.044	0
OTU_571	3.824	9.542	3.38845e-05	0.00151473	Enriched	0.042	0
OTU_364	3.279	9.582	3.76169e-05	0.00162445	Enriched	0.043	0.002
OTU_714	2.899	9.611	3.83033e-05	0.00162445	Enriched	0.047	0.003
OTU_1258	3.312	9.399	4.01238e-05	0.00165912	Enriched	0.029	0
OTU_1496	2.741	9.811	4.24772e-05	0.00171359	Enriched	0.065	0.008
OTU_251	2.278	10.145	4.66694e-05	0.00183788	Enriched	0.099	0.017
OTU_174	2.601	9.842	4.87467e-05	0.00187505	Enriched	0.067	0.008
OTU_588	2.641	9.767	5.18524e-05	0.00194918	Enriched	0.06	0.007
OTU_300	2.174	10.196	5.42868e-05	0.00199534	Enriched	0.105	0.022
OTU_155	1.461	11.513	6.17033e-05	0.00221864	Enriched	0.346	0.135
OTU_115	1.492	11.565	7.1037e-05	0.0024999	Enriched	0.358	0.136
OTU_23	2.456	10.34	7.41209e-05	0.00255408	Enriched	0.135	0.022
OTU_156	-3.01	9.327	8.75458e-05	0.00295512	Depleted	0	0.025
OTU_951	1.849	10.86	0.000100862	0.00333651	Enriched	0.203	0.058
OTU_306	-2.418	10.013	0.000104194	0.00337916	Depleted	0.013	0.091
OTU_557	2.446	9.807	0.000107624	0.00340681	Enriched	0.063	0.008
OTU_1088	2.345	10.186	0.000110324	0.00340681	Enriched	0.107	0.018
OTU_898	3.351	9.63	0.000111226	0.00340681	Enriched	0.047	0.002
OTU_695	2.448	10.317	0.000114421	0.00344097	Enriched	0.126	0.022
OTU_1549	1.674	10.509	0.000119108	0.00351794	Enriched	0.145	0.045
OTU_450	3.057	9.34	0.000127767	0.0037075	Enriched	0.023	0
OTU_1561	2.794	10.048	0.000131232	0.00372071	Enriched	0.093	0.012
OTU_423	-1.638	10.916	0.000132722	0.00372071	Depleted	0.066	0.226
OTU_128	2.053	10.374	0.000138787	0.00381827	Enriched	0.129	0.029
OTU_617	-3.158	9.536	0.000140819	0.00381827	Depleted	0.002	0.045
OTU_772	1.839	10.258	0.000149338	0.00398396	Enriched	0.109	0.031
OTU_543	-1.719	11.909	0.000172831	0.00453749	Depleted	0.148	0.552
OTU_104	1.919	10.286	0.000186396	0.00481718	Enriched	0.112	0.028
OTU_368	3.508	9.989	0.000199997	0.00508917	Enriched	0.087	0.005
OTU_265	1.913	10.642	0.000209058	0.00518904	Enriched	0.168	0.044
OTU_61	2.851	9.297	0.000210197	0.00518904	Enriched	0.021	0
OTU_1575	-1.852	10.619	0.000217088	0.00528035	Depleted	0.042	0.17
OTU_135	-2.429	10.164	0.000223766	0.00532946	Depleted	0.017	0.117
OTU_996	2.542	10.137	0.000225551	0.00532946	Enriched	0.1	0.015
OTU_602	2.884	9.461	0.000233782	0.00544614	Enriched	0.033	0.002
OTU_1439	-2.05	10.19	0.000243728	0.00559898	Depleted	0.022	0.113
OTU_499	1.895	9.964	0.000255605	0.00579137	Enriched	0.074	0.018
OTU_253	-2.179	9.676	0.000287658	0.00642954	Depleted	0.009	0.053
OTU_631	2.398	9.473	0.000313062	0.00681981	Enriched	0.032	0.004
OTU_475	-3.118	9.351	0.000313365	0.00681981	Depleted	0	0.026
OTU_403	2.646	9.536	0.000323832	0.00695608	Enriched	0.04	0.003
OTU_1152	-2.402	9.666	0.000342136	0.00725503	Depleted	0.007	0.055
OTU_460	-2.385	9.92	0.000351886	0.00732023	Depleted	0.012	0.08
OTU_666	-2.391	9.571	0.000354062	0.00732023	Depleted	0.005	0.043
OTU_103	-2.773	9.279	0.000363002	0.00741242	Depleted	0	0.02
OTU_1268	2.834	9.456	0.000368189	0.00742665	Enriched	0.032	0.002
OTU_428	-2.403	10.547	0.000380082	0.00757416	Depleted	0.028	0.157
OTU_1391	-3.045	9.648	0.000394717	0.00777217	Depleted	0.004	0.051
OTU_343	1.991	9.917	0.000406361	0.00790731	Enriched	0.072	0.016
OTU_235	1.818	10.212	0.000415296	0.00798721	Enriched	0.1	0.031
OTU_288	3.206	9.375	0.00044075	0.00837932	Enriched	0.027	0
OTU_1250	2.978	9.777	0.000481983	0.00904894	Enriched	0.062	0.005
OTU_738	-1.578	11.496	0.000486914	0.00904894	Depleted	0.115	0.392
OTU_478	1.385	11.592	0.000501732	0.00922073	Enriched	0.356	0.145
OTU_132	1.498	11.407	0.00052529	0.00939891	Enriched	0.315	0.11
OTU_645	3.496	9.444	0.000526038	0.00939891	Enriched	0.032	0
OTU_798	-2.77	9.427	0.000528475	0.00939891	Depleted	0.002	0.032
OTU_1492	-2.749	9.274	0.000551069	0.00969647	Depleted	0	0.018
OTU_691	2.753	9.28	0.000581556	0.0100814	Enriched	0.018	0
OTU_1193	2.862	9.301	0.000585138	0.0100814	Enriched	0.02	0
OTU_482	-1.926	9.946	0.000593291	0.0101165	Depleted	0.017	0.079
OTU_267	2.712	9.563	0.000621124	0.0103931	Enriched	0.04	0.005
OTU_1486	1.233	12.227	0.000622316	0.0103931	Enriched	0.588	0.263
OTU_85	-1.416	11.368	0.00062836	0.0103931	Depleted	0.112	0.316
OTU_286	1.904	9.953	0.000657069	0.0106429	Enriched	0.072	0.018
OTU_965	2.658	9.674	0.000657685	0.0106429	Enriched	0.05	0.005
OTU_1131	1.926	10.759	0.000662767	0.0106429	Enriched	0.187	0.052
OTU_26	2.314	9.552	0.000706206	0.0112314	Enriched	0.039	0.006
OTU_1127	-2.54	9.497	0.000785892	0.0123797	Depleted	0.003	0.04
OTU_572	2.411	9.579	0.000842288	0.0130947	Enriched	0.042	0.005
OTU_998	1.417	12.486	0.000847118	0.0130947	Enriched	0.743	0.275
OTU_47	3.058	9.527	0.00089066	0.0136403	Enriched	0.041	0.002
OTU_1282	-2.529	9.237	0.000904704	0.0137283	Depleted	0	0.016
OTU_1311	1.667	10.759	0.000941692	0.0139945	Enriched	0.177	0.056
OTU_1600	2.851	9.453	0.000946641	0.0139945	Enriched	0.032	0.002
OTU_1470	-1.871	9.856	0.00094763	0.0139945	Depleted	0.016	0.07
OTU_1448	-2.235	9.705	0.00101539	0.0148624	Depleted	0.008	0.056
OTU_183	2.009	9.926	0.00107568	0.0156068	Enriched	0.072	0.016
OTU_620	2.432	9.475	0.00110301	0.0158641	Enriched	0.032	0.003
OTU_1634	2.944	9.318	0.00112314	0.0160063	Enriched	0.022	0
OTU_112	1.92	9.974	0.00113725	0.0160063	Enriched	0.075	0.018
OTU_1052	2.498	9.235	0.00114671	0.0160063	Enriched	0.015	0
OTU_1658	-1.701	10.368	0.0011516	0.0160063	Depleted	0.035	0.138
OTU_648	-2.743	9.276	0.0011996	0.0165345	Depleted	0	0.023
OTU_1424	-1.409	11.085	0.00121254	0.0165747	Depleted	0.088	0.263
OTU_796	1.596	11.044	0.00123605	0.0167576	Enriched	0.23	0.077
OTU_150	2.953	9.32	0.00125766	0.016912	Enriched	0.022	0
OTU_653	2.753	9.281	0.00132808	0.0175701	Enriched	0.018	0
OTU_503	2.583	9.53	0.00132938	0.0175701	Enriched	0.035	0.005
OTU_224	2.245	9.543	0.00133847	0.0175701	Enriched	0.037	0.005
OTU_635	-1.999	10.795	0.00137453	0.0179014	Depleted	0.049	0.151
OTU_366	2.503	9.238	0.00142326	0.0183912	Enriched	0.015	0
OTU_1659	-2.162	9.681	0.00145399	0.0185472	Depleted	0.008	0.05
OTU_228	-2.653	9.26	0.00145776	0.0185472	Depleted	0	0.019
OTU_1186	-2.26	9.43	0.00148011	0.0186878	Depleted	0.004	0.034
OTU_1598	1.308	10.849	0.00159752	0.0200175	Enriched	0.185	0.076
OTU_477	-1.275	10.768	0.00162799	0.0202458	Depleted	0.07	0.189
OTU_215	2.184	10.008	0.00164763	0.0203372	Enriched	0.084	0.016
OTU_374	-1.614	10.308	0.00168916	0.0206953	Depleted	0.033	0.123
OTU_1262	1.489	12.002	0.00177431	0.0214558	Enriched	0.508	0.18
OTU_397	2.629	9.259	0.00178839	0.0214558	Enriched	0.017	0
OTU_1056	2.339	9.339	0.00179015	0.0214558	Enriched	0.022	0.002
OTU_1312	-1.721	10.251	0.00181352	0.0215795	Depleted	0.03	0.124
OTU_376	-1.908	9.92	0.00190088	0.0224576	Depleted	0.018	0.075
OTU_766	-1.826	9.908	0.00193599	0.0227101	Depleted	0.017	0.072
OTU_1637	-1.821	9.841	0.00203975	0.0237588	Depleted	0.016	0.069
OTU_446	-2.287	9.323	0.00207608	0.0240128	Depleted	0.002	0.021
OTU_1096	1.918	9.616	0.00209401	0.024052	Enriched	0.042	0.01
OTU_908	2.671	9.412	0.00214792	0.0245011	Enriched	0.028	0.002
OTU_929	2.363	9.216	0.00218987	0.0246805	Enriched	0.013	0
OTU_862	2.367	9.217	0.00219349	0.0246805	Enriched	0.013	0
OTU_1534	2.733	9.278	0.00222192	0.0247276	Enriched	0.02	0
OTU_833	2.534	9.244	0.00222757	0.0247276	Enriched	0.015	0
OTU_1343	-1.532	10.006	0.00224314	0.0247343	Depleted	0.024	0.079
OTU_1113	-1.475	10.566	0.00229389	0.0250368	Depleted	0.052	0.159
OTU_162	2.932	9.317	0.00230084	0.0250368	Enriched	0.022	0
OTU_1204	2.376	9.22	0.00244165	0.026228	Enriched	0.013	0
OTU_717	1.817	9.595	0.00244202	0.026228	Enriched	0.039	0.01
OTU_369	2.101	9.796	0.00248621	0.0265303	Enriched	0.057	0.01
OTU_809	2.103	9.399	0.00267796	0.0283932	Enriched	0.025	0.003
OTU_733	1.54	11.469	0.00273799	0.0288448	Enriched	0.337	0.116
OTU_136	2.645	9.262	0.00278596	0.0291644	Enriched	0.017	0
OTU_1509	2.07	9.667	0.00280379	0.0291664	Enriched	0.047	0.01
OTU_713	2.212	9.437	0.00284818	0.0294431	Enriched	0.028	0.003
OTU_636	-2.517	9.504	0.00290478	0.0298416	Depleted	0.003	0.039
OTU_342	-2.481	9.362	0.00294318	0.0300495	Depleted	0.002	0.028
OTU_1663	-1.933	9.675	0.0030969	0.0313358	Depleted	0.01	0.05
OTU_795	-2.487	9.234	0.00311749	0.0313358	Depleted	0	0.015
OTU_663	1.553	10.331	0.00315412	0.0313358	Enriched	0.114	0.039
OTU_716	-2.608	9.254	0.00316829	0.0313358	Depleted	0	0.017
OTU_1395	-1.889	10.09	0.0031717	0.0313358	Depleted	0.023	0.09
OTU_413	1.294	11.906	0.00318284	0.0313358	Enriched	0.454	0.202
OTU_28	2.108	9.399	0.00327457	0.032007	Enriched	0.025	0.003
OTU_97	2.374	9.22	0.00329811	0.032007	Enriched	0.014	0
OTU_1367	2.367	9.218	0.00330907	0.032007	Enriched	0.014	0
OTU_1382	2.509	9.375	0.00332889	0.0320115	Enriched	0.025	0.002
OTU_707	1.209	11.124	0.00336082	0.0321318	Enriched	0.236	0.106
OTU_248	2.272	9.211	0.00346953	0.0329805	Enriched	0.012	0
OTU_326	-2.267	9.525	0.00348998	0.0329853	Depleted	0.005	0.037
OTU_309	2.142	9.585	0.00356198	0.0333337	Enriched	0.04	0.007
OTU_1121	1.582	10.339	0.00356715	0.0333337	Enriched	0.112	0.039
OTU_516	2.505	9.24	0.00360299	0.0334795	Enriched	0.015	0
OTU_1584	2.727	9.278	0.00365345	0.0336436	Enriched	0.018	0
OTU_1622	1.394	11.046	0.00366134	0.0336436	Enriched	0.222	0.095
OTU_659	-1.349	10.756	0.0037695	0.0344461	Depleted	0.065	0.19
OTU_508	1.711	10.191	0.00380421	0.0345635	Enriched	0.094	0.032
OTU_1428	1.939	9.543	0.00382413	0.0345635	Enriched	0.035	0.008
OTU_1620	1.155	10.548	0.00397655	0.0357457	Enriched	0.131	0.062
OTU_611	2.443	9.359	0.00424239	0.0379293	Enriched	0.023	0.002
OTU_1006	-1.942	9.615	0.00442722	0.0393689	Depleted	0.008	0.043
OTU_1223	-1.839	9.577	0.00452582	0.0400306	Depleted	0.008	0.041
OTU_687	2.226	9.199	0.00458067	0.0403001	Enriched	0.012	0
OTU_1028	-2.847	9.45	0.004645	0.0406499	Depleted	0.002	0.033
OTU_500	2.251	9.323	0.00473762	0.0412087	Enriched	0.021	0.002
OTU_525	-0.997	11.749	0.00476403	0.0412087	Depleted	0.191	0.421
OTU_69	2.701	9.571	0.0047836	0.0412087	Enriched	0.044	0.005
OTU_1219	-2.1	9.184	0.00493628	0.041629	Depleted	0	0.013
OTU_298	2.373	9.465	0.00495612	0.041629	Enriched	0.032	0.003
OTU_855	-2.086	9.18	0.00495687	0.041629	Depleted	0	0.012
OTU_1322	-2.073	9.175	0.00495763	0.041629	Depleted	0	0.011
OTU_1134	-2.084	9.179	0.00495823	0.041629	Depleted	0	0.012
OTU_784	1.202	10.294	0.0050031	0.0416312	Enriched	0.1	0.043
OTU_661	2.211	9.196	0.00500883	0.0416312	Enriched	0.012	0
OTU_808	1.181	10.402	0.00516694	0.0427306	Enriched	0.113	0.051
OTU_281	0.858	12.15	0.00530175	0.0433414	Enriched	0.506	0.304
OTU_72	-1.838	9.506	0.00533295	0.0433414	Depleted	0.007	0.033
OTU_1443	1.748	9.569	0.00533879	0.0433414	Enriched	0.037	0.009
OTU_933	-1.274	11.647	0.00534561	0.0433414	Depleted	0.156	0.366
OTU_62	1.879	9.689	0.00546595	0.044034	Enriched	0.047	0.011
OTU_956	-2.152	9.296	0.00548429	0.044034	Depleted	0.002	0.02
OTU_439	2.477	9.236	0.00560646	0.0446624	Enriched	0.015	0
OTU_443	-2.251	9.623	0.00561655	0.0446624	Depleted	0.007	0.049
OTU_1166	1.771	10.028	0.00564924	0.0447074	Enriched	0.08	0.021
OTU_1422	2.746	9.281	0.00588228	0.0461296	Enriched	0.018	0
OTU_674	2.05	9.176	0.00588474	0.0461296	Enriched	0.01	0
OTU_1580	-1.23	13.325	0.0059722	0.0464864	Depleted	0.568	1.526
OTU_100	-1.132	11.526	0.00600275	0.0464864	Depleted	0.152	0.36
OTU_144	-2.121	9.187	0.00603232	0.0464864	Depleted	0	0.014
OTU_824	2.512	9.241	0.00604267	0.0464864	Enriched	0.015	0
OTU_857	1.945	9.45	0.00611065	0.0467917	Enriched	0.029	0.005
OTU_744	2.221	9.199	0.00616513	0.0468332	Enriched	0.012	0
OTU_1389	-2.08	9.178	0.00618457	0.0468332	Depleted	0	0.011
OTU_1211	1.107	10.939	0.00620101	0.0468332	Enriched	0.193	0.096
OTU_345	2	9.642	0.00629552	0.0473308	Enriched	0.043	0.009
OTU_445	-1.329	10.416	0.00646176	0.0481985	Depleted	0.046	0.132
OTU_699	2.157	9.596	0.0064692	0.0481985	Enriched	0.042	0.007
OTU_393	2.232	9.2	0.00653411	0.0484637	Enriched	0.012	0
OTU_927	2.211	9.197	0.00664171	0.0489334	Enriched	0.012	0
OTU_1369	-2.019	9.378	0.00665661	0.0489334	Depleted	0.003	0.026
OTU_1334	-1.768	9.635	0.00683275	0.0500061	Depleted	0.01	0.047
OTU_1161	1.099	12.314	0.00713055	0.0519556	Enriched	0.61	0.312
OTU_14	1.911	9.366	0.00718611	0.0520849	Enriched	0.022	0.004
OTU_220	-1.774	9.568	0.00723434	0.0520849	Depleted	0.009	0.038
OTU_504	2.057	9.178	0.00724275	0.0520849	Enriched	0.01	0
OTU_852	1.83	9.613	0.00750847	0.0537499	Enriched	0.041	0.01
OTU_534	-1.678	9.534	0.00753928	0.0537499	Depleted	0.008	0.034
OTU_1626	-1.953	9.532	0.00774912	0.0550087	Depleted	0.007	0.038
OTU_1281	-2.017	9.378	0.00787689	0.0555984	Depleted	0.003	0.025
OTU_758	-2.091	9.18	0.00790911	0.0555984	Depleted	0	0.013
OTU_1545	-2.156	9.19	0.00793302	0.0555984	Depleted	0	0.013
OTU_1305	1.501	9.998	0.00809138	0.0564689	Enriched	0.073	0.023
OTU_1224	-2.047	9.173	0.00815852	0.0566983	Depleted	0	0.01
OTU_842	-1.456	9.826	0.00849605	0.058797	Depleted	0.019	0.066
OTU_1442	-1.244	11.306	0.00870406	0.0599855	Depleted	0.114	0.313
OTU_325	-2.04	9.172	0.0087873	0.0603078	Depleted	0	0.01
OTU_948	1.908	9.852	0.00888601	0.0607333	Enriched	0.065	0.018
OTU_1449	2.017	9.55	0.00893565	0.0608213	Enriched	0.037	0.007
OTU_422	2.073	9.181	0.00911963	0.0618192	Enriched	0.01	0
OTU_432	2.067	9.18	0.00916551	0.0618713	Enriched	0.01	0
OTU_1246	2.056	9.178	0.00923231	0.0618713	Enriched	0.01	0
OTU_1625	-1.307	10.237	0.00923955	0.0618713	Depleted	0.037	0.105
OTU_340	1.788	9.494	0.00970537	0.0647285	Enriched	0.032	0.007
OTU_1292	2.186	9.194	0.00990449	0.0657913	Enriched	0.012	0
OTU_658	1.134	10.501	0.0100829	0.0663749	Enriched	0.125	0.055
OTU_375	2.094	9.3	0.0101076	0.0663749	Enriched	0.018	0.002
OTU_1651	-1.534	9.949	0.0101127	0.0663749	Depleted	0.022	0.075
OTU_167	1.81	9.585	0.0102109	0.0667542	Enriched	0.038	0.01
OTU_488	1.997	9.543	0.0102928	0.0669287	Enriched	0.035	0.007
OTU_490	-1.976	9.369	0.0103539	0.0669287	Depleted	0.003	0.028
OTU_1592	-1.917	9.165	0.010359	0.0669287	Depleted	0	0.009
OTU_724	1.109	11.809	0.0105219	0.067717	Enriched	0.406	0.197
OTU_38	0.893	11.364	0.0109038	0.0699026	Enriched	0.27	0.157
OTU_146	1.573	10.108	0.0109482	0.0699161	Enriched	0.085	0.026
OTU_1092	-1.03	11.147	0.0110593	0.0703539	Depleted	0.11	0.246
OTU_652	-1.937	9.26	0.0111712	0.0707935	Depleted	0.002	0.017
OTU_887	1.715	9.699	0.0113595	0.0717125	Enriched	0.047	0.014
OTU_1154	-1.912	9.525	0.0115194	0.0724449	Depleted	0.007	0.034
OTU_1605	-1.516	9.742	0.0116244	0.0725793	Depleted	0.015	0.055
OTU_921	-1.442	9.964	0.01164	0.0725793	Depleted	0.024	0.076
OTU_49	1.864	9.525	0.0116724	0.0725793	Enriched	0.036	0.007
OTU_1331	-2.037	9.285	0.0117792	0.0729695	Depleted	0.002	0.018
OTU_782	1.515	9.89	0.0121394	0.0746428	Enriched	0.06	0.022
OTU_1333	1.864	9.157	0.0121396	0.0746428	Enriched	0.009	0
OTU_1215	0.813	12.826	0.0124078	0.0760093	Enriched	0.848	0.516
OTU_6	-1.834	9.501	0.0125965	0.076558	Depleted	0.007	0.033
OTU_1159	-1.905	9.16	0.0126329	0.076558	Depleted	0	0.011
OTU_1364	-1.905	9.16	0.0126362	0.076558	Depleted	0	0.01
OTU_1317	1.522	9.918	0.0128202	0.0773888	Enriched	0.066	0.022
OTU_1007	-1.028	11.036	0.0130688	0.0779286	Depleted	0.102	0.217
OTU_440	1.875	9.431	0.0130775	0.0779286	Enriched	0.027	0.005
OTU_1180	-1.859	9.152	0.0131144	0.0779286	Depleted	0	0.009
OTU_473	2.021	9.174	0.0131266	0.0779286	Enriched	0.01	0
OTU_496	-1.856	9.151	0.0131452	0.0779286	Depleted	0	0.009
OTU_848	-1.32	9.972	0.013205	0.078004	Depleted	0.026	0.071
OTU_217	-1.968	9.359	0.0135627	0.0796488	Depleted	0.003	0.024
OTU_400	-2.265	9.431	0.0135798	0.0796488	Depleted	0.003	0.028
OTU_874	-1.695	10.638	0.0138409	0.0806993	Depleted	0.051	0.163
OTU_111	1.603	9.756	0.0138565	0.0806993	Enriched	0.05	0.014
OTU_538	-1.189	10.775	0.0144626	0.083934	Depleted	0.07	0.178
OTU_767	1.126	12.218	0.0145211	0.0839789	Enriched	0.565	0.296
OTU_63	1.159	10.55	0.0146662	0.0845221	Enriched	0.134	0.061
OTU_321	1.846	9.154	0.0148209	0.0849346	Enriched	0.008	0
OTU_535	0.803	14.388	0.0148404	0.0849346	Enriched	2.593	1.627
OTU_36	-1.897	9.253	0.0149546	0.085293	Depleted	0.002	0.015
OTU_206	-1.948	9.165	0.0151837	0.086216	Depleted	0	0.011
OTU_1227	-1.118	10.271	0.0152207	0.086216	Depleted	0.042	0.102
OTU_1024	1.435	9.553	0.015297	0.0863525	Enriched	0.034	0.011
OTU_1501	2.058	9.562	0.0155529	0.0874983	Enriched	0.039	0.007
OTU_346	-1.899	9.159	0.0159064	0.0891744	Depleted	0	0.01
OTU_1519	1.995	9.281	0.0159587	0.0891744	Enriched	0.017	0.002
OTU_1307	-1.417	9.596	0.016242	0.0901926	Depleted	0.012	0.04
OTU_708	1.879	9.264	0.0162499	0.0901926	Enriched	0.015	0.002
OTU_812	-2.035	9.278	0.0164955	0.0911997	Depleted	0.002	0.017
OTU_424	1.566	9.511	0.0165662	0.0911997	Enriched	0.033	0.008
OTU_1217	-1.38	10.133	0.0166343	0.0911997	Depleted	0.03	0.098
OTU_277	-2.139	9.403	0.0166519	0.0911997	Depleted	0.003	0.028
OTU_201	-1.858	9.153	0.0173318	0.09461	Depleted	0	0.01
OTU_303	-1.248	10.652	0.0174655	0.0950261	Depleted	0.062	0.171
OTU_726	-2.048	9.278	0.0175916	0.0953984	Depleted	0.002	0.017
OTU_668	-1.798	9.242	0.0178947	0.096725	Depleted	0.002	0.015
OTU_1129	-1.201	11.246	0.0181485	0.0977775	Depleted	0.112	0.285
OTU_548	1.85	9.155	0.0183563	0.0985755	Enriched	0.008	0
OTU_1650	-1.352	10.113	0.0185734	0.099419	Depleted	0.03	0.089
OTU_736	-1.831	9.337	0.0192606	0.102386	Depleted	0.003	0.021
OTU_718	-0.947	11.047	0.0193943	0.102386	Depleted	0.109	0.22
OTU_249	0.861	12.263	0.0194361	0.102386	Enriched	0.544	0.322
OTU_29	1.034	11.945	0.0194367	0.102386	Enriched	0.449	0.245
OTU_154	1.837	9.153	0.0194373	0.102386	Enriched	0.009	0
OTU_678	1.105	10.828	0.0197715	0.103816	Enriched	0.176	0.089
OTU_337	-1.076	10.575	0.0202821	0.10616	Depleted	0.062	0.148
OTU_683	-1.677	9.394	0.0204257	0.106381	Depleted	0.005	0.028
OTU_1565	-1.78	9.326	0.0204678	0.106381	Depleted	0.003	0.02
OTU_1454	1.803	9.343	0.0205738	0.106381	Enriched	0.02	0.005
OTU_1346	-1.052	10.346	0.020631	0.106381	Depleted	0.048	0.112
OTU_328	-0.981	10.487	0.0206459	0.106381	Depleted	0.058	0.128
OTU_466	-1.086	10.544	0.0208207	0.106949	Depleted	0.061	0.14
OTU_1456	-1.724	9.312	0.0211742	0.108428	Depleted	0.003	0.018
OTU_1418	-1.036	10.051	0.0215852	0.110019	Depleted	0.034	0.078
OTU_1221	-1.47	9.676	0.0216423	0.110019	Depleted	0.014	0.043
OTU_147	-0.73	12.233	0.0216845	0.110019	Depleted	0.32	0.564
OTU_195	1.403	9.615	0.0220871	0.11122	Enriched	0.038	0.012
OTU_24	1.547	9.517	0.0221059	0.11122	Enriched	0.032	0.01
OTU_1296	-1.785	9.236	0.0221362	0.11122	Depleted	0.002	0.015
OTU_1366	-0.903	12.562	0.0221902	0.11122	Depleted	0.377	0.795
OTU_176	-1.207	10.299	0.022471	0.112287	Depleted	0.042	0.101
OTU_1275	1.142	10.38	0.0234887	0.117019	Enriched	0.11	0.05
OTU_106	-1.522	9.441	0.0236236	0.117338	Depleted	0.007	0.026
OTU_656	-1.216	9.851	0.0238762	0.118237	Depleted	0.022	0.058
OTU_120	0.913	12.214	0.0242495	0.119728	Enriched	0.542	0.297
OTU_333	1.331	9.786	0.0245315	0.120465	Enriched	0.052	0.02
OTU_1259	-1.342	9.68	0.0245446	0.120465	Depleted	0.015	0.047
OTU_200	-1.677	9.137	0.0247396	0.120711	Depleted	0	0.009
OTU_924	-1.768	9.236	0.0249007	0.120711	Depleted	0.002	0.013
OTU_939	-1.671	9.136	0.0249027	0.120711	Depleted	0	0.007
OTU_1274	-1.888	9.587	0.0249288	0.120711	Depleted	0.008	0.039
OTU_1336	-1.67	9.136	0.0249597	0.120711	Depleted	0	0.007
OTU_1583	-1.664	9.135	0.0251807	0.121425	Depleted	0	0.007
OTU_1520	-1.659	9.135	0.0254268	0.122256	Depleted	0	0.008
OTU_1461	-1.205	10.3	0.0257858	0.123622	Depleted	0.042	0.112
OTU_184	-1.644	9.132	0.02597	0.123795	Depleted	0	0.007
OTU_1019	-1.644	9.132	0.0260245	0.123795	Depleted	0	0.008
OTU_1612	1.251	10	0.0260769	0.123795	Enriched	0.071	0.031
OTU_453	1.819	9.152	0.0261212	0.123795	Enriched	0.008	0
OTU_1310	-1.359	9.839	0.0263487	0.12423	Depleted	0.02	0.061
OTU_783	-1.039	10.328	0.0263834	0.12423	Depleted	0.047	0.103
OTU_256	-1.252	9.85	0.0264382	0.12423	Depleted	0.022	0.062
OTU_786	1.07	10.332	0.0267193	0.125079	Enriched	0.103	0.049
OTU_283	-1.623	9.129	0.0268441	0.125079	Depleted	0	0.007
OTU_1062	-1.623	9.129	0.0268458	0.125079	Depleted	0	0.007
OTU_1567	-1.613	9.127	0.0272492	0.126601	Depleted	0	0.007
OTU_1505	1.652	9.137	0.0275057	0.127435	Enriched	0.007	0
OTU_13	0.935	10.866	0.027585	0.127446	Enriched	0.178	0.093
OTU_865	-1.215	10.361	0.0276815	0.127535	Depleted	0.046	0.127
OTU_252	-1.427	9.764	0.0278654	0.128026	Depleted	0.017	0.054
OTU_1550	1.634	9.134	0.0282279	0.128711	Enriched	0.007	0
OTU_1220	1.631	9.133	0.0283396	0.128711	Enriched	0.007	0
OTU_1120	1.631	9.133	0.0283436	0.128711	Enriched	0.007	0
OTU_698	1.63	9.133	0.0284042	0.128711	Enriched	0.007	0
OTU_1117	1.489	9.845	0.0284073	0.128711	Enriched	0.059	0.02
OTU_352	1.627	9.133	0.0285463	0.128711	Enriched	0.007	0
OTU_1375	1.626	9.133	0.0285591	0.128711	Enriched	0.007	0
OTU_1269	1.618	9.131	0.0289423	0.130083	Enriched	0.007	0
OTU_1373	-0.792	11.601	0.0291726	0.130606	Depleted	0.187	0.345
OTU_449	1.611	9.13	0.0292165	0.130606	Enriched	0.007	0
OTU_980	-0.842	10.931	0.0297576	0.132666	Depleted	0.101	0.193
OTU_263	-0.905	10.673	0.0303761	0.135059	Depleted	0.074	0.149
OTU_917	1.44	9.495	0.0304717	0.135121	Enriched	0.029	0.008
OTU_289	1.422	10.304	0.0308844	0.136585	Enriched	0.107	0.042
OTU_260	-1.309	9.666	0.0310316	0.13687	Depleted	0.016	0.044
OTU_275	-1.22	10.012	0.0316816	0.138858	Depleted	0.029	0.077
OTU_134	1.744	9.256	0.0317025	0.138858	Enriched	0.013	0.002
OTU_970	-1.369	9.748	0.0318296	0.138858	Depleted	0.018	0.054
OTU_1627	-1.792	9.506	0.0319721	0.138858	Depleted	0.007	0.033
OTU_832	-1.099	10.246	0.0320222	0.138858	Depleted	0.044	0.102
OTU_528	1.213	9.782	0.032033	0.138858	Enriched	0.049	0.02
OTU_407	0.786	10.875	0.03207	0.138858	Enriched	0.165	0.102
OTU_487	-1.47	9.836	0.0324743	0.140241	Depleted	0.018	0.066
OTU_307	1.15	10.423	0.0328651	0.14156	Enriched	0.114	0.051
OTU_1646	-1.086	11.124	0.0330818	0.142123	Depleted	0.11	0.24
OTU_71	-1.26	9.56	0.0334291	0.143243	Depleted	0.012	0.036
OTU_912	1.037	10.092	0.0339367	0.145042	Enriched	0.076	0.036
OTU_688	-1.465	10.204	0.0347216	0.148014	Depleted	0.032	0.103
OTU_437	-0.917	11.655	0.0348831	0.14832	Depleted	0.186	0.369
OTU_117	-1.85	9.258	0.0353507	0.149923	Depleted	0.002	0.016
OTU_1216	-0.831	11.386	0.0355815	0.150516	Depleted	0.147	0.285
OTU_40	1.598	9.298	0.0362932	0.153135	Enriched	0.017	0.003
OTU_1247	1.706	9.319	0.0366553	0.1541	Enriched	0.018	0.003
OTU_1135	1.555	9.45	0.0367083	0.1541	Enriched	0.027	0.008
OTU_420	0.745	11.238	0.0374104	0.156508	Enriched	0.232	0.144
OTU_138	1.572	9.471	0.037471	0.156508	Enriched	0.027	0.008
OTU_946	0.942	10.473	0.037872	0.157784	Enriched	0.116	0.064
OTU_268	0.855	10.61	0.0382043	0.158769	Enriched	0.131	0.077
OTU_468	-1.17	9.791	0.0393284	0.162762	Depleted	0.02	0.054
OTU_1493	-1.876	9.254	0.0393621	0.162762	Depleted	0.002	0.014
OTU_987	-1.011	9.986	0.0395901	0.163297	Depleted	0.03	0.071
OTU_995	-1.782	9.241	0.0401141	0.165046	Depleted	0.002	0.016
OTU_506	1.809	9.259	0.0417269	0.170842	Enriched	0.016	0.003
OTU_997	-1.803	9.242	0.0417292	0.170842	Depleted	0.002	0.016
OTU_524	-1.419	9.534	0.0427575	0.1739	Depleted	0.01	0.035
OTU_672	-0.996	10.296	0.0428	0.1739	Depleted	0.047	0.11
OTU_157	1.605	9.726	0.0428427	0.1739	Enriched	0.05	0.015
OTU_537	0.878	11.725	0.0428967	0.1739	Enriched	0.365	0.205
OTU_46	-1.441	9.652	0.0432023	0.174711	Depleted	0.013	0.046
OTU_1465	-1.085	9.886	0.043851	0.176902	Depleted	0.025	0.061
OTU_395	-1.392	9.582	0.0443069	0.178306	Depleted	0.012	0.039
OTU_949	-1.425	9.411	0.0445789	0.178965	Depleted	0.007	0.025
OTU_836	1.754	9.237	0.0450092	0.180255	Enriched	0.013	0.002
OTU_590	1.569	9.385	0.04581	0.183019	Enriched	0.022	0.006
OTU_1467	1.054	9.734	0.0462917	0.184498	Enriched	0.044	0.022
OTU_1303	0.622	13.558	0.046943	0.186643	Enriched	1.36	0.95
OTU_4	1.405	9.41	0.0470995	0.186817	Enriched	0.023	0.007
OTU_623	-1.154	10.085	0.0472806	0.187086	Depleted	0.032	0.078
OTU_1455	1.58	9.375	0.047697	0.188284	Enriched	0.023	0.005
OTU_630	-1.415	9.115	0.0479591	0.188867	Depleted	0	0.006
OTU_48	-1.327	9.521	0.0483059	0.189782	Depleted	0.01	0.033
OTU_1270	-1.403	9.114	0.0486858	0.19082	Depleted	0	0.006
OTU_1023	-1.161	9.835	0.049251	0.192146	Depleted	0.022	0.056
OTU_603	1.339	9.405	0.0492563	0.192146	Enriched	0.022	0.007
OTU_936	-1.418	9.557	0.0496763	0.193328	Depleted	0.01	0.036
OTU_1359

## Sheet: Table S5
OTUID	Grass enriched taxa
OTU_1037	D_0__Bacteria;D_1__Actinobacteriota;D_2__MB-A2-108
OTU_104	D_0__Bacteria;D_1__Myxococcota;D_2__Myxococcia;D_3__Myxococcales;D_4__Myxococcaceae;D_5__Cystobacter;D_6__Cystobacter_fuscus
OTU_109	D_0__Bacteria;D_1__Gemmatimonadota;D_2__Gemmatimonadetes;D_3__Gemmatimonadales;D_4__Gemmatimonadaceae;D_5__Gemmatimonadaceae_uncultured
OTU_1297	D_0__Bacteria;D_1__Gemmatimonadota;D_2__Gemmatimonadetes;D_3__Gemmatimonadales;D_4__Gemmatimonadaceae;D_5__Gemmatimonadaceae_uncultured
OTU_134	D_0__Bacteria;D_1__Gemmatimonadota;D_2__Gemmatimonadetes;D_3__Gemmatimonadales;D_4__Gemmatimonadaceae;D_5__Gemmatimonas
OTU_1420	D_0__Bacteria;D_1__Proteobacteria;D_2__Gammaproteobacteria;D_3__Burkholderiales;D_4__TRA3-20
OTU_1456	D_0__Bacteria;D_1__Myxococcota;D_2__Myxococcia;D_3__Myxococcales;D_4__Myxococcaceae;D_5__Cystobacter
OTU_162	D_0__Bacteria;D_1__Gemmatimonadota;D_2__Gemmatimonadetes;D_3__Gemmatimonadales;D_4__Gemmatimonadaceae;D_5__Gemmatimonadaceae_uncultured
OTU_1627	D_0__Bacteria;D_1__Actinobacteriota;D_2__Actinobacteria;D_3__Micromonosporales;D_4__Micromonosporaceae;D_5__Spirilliplanes;D_6__Spirilliplanes_yamanashiensis
OTU_249	D_0__Bacteria;D_1__Planctomycetota;D_2__Phycisphaerae;D_3__Tepidisphaerales;D_4__WD2101_soil_group
OTU_285	D_0__Bacteria;D_1__Gemmatimonadota;D_2__Gemmatimonadetes;D_3__Gemmatimonadales;D_4__Gemmatimonadaceae;D_5__Gemmatimonadaceae_uncultured
OTU_340	D_0__Bacteria;D_1__Planctomycetota;D_2__Phycisphaerae;D_3__Tepidisphaerales;D_4__WD2101_soil_group
OTU_42	D_0__Bacteria;D_1__Bacteroidota;D_2__Bacteroidia;D_3__Chitinophagales;D_4__Saprospiraceae;D_5__Saprospiraceae_uncultured
OTU_436	D_0__Bacteria;D_1__Bacteroidota;D_2__Bacteroidia;D_3__Chitinophagales;D_4__Chitinophagaceae;D_5__Ferruginibacter
OTU_497	D_0__Bacteria;D_1__Actinobacteriota;D_2__Thermoleophilia;D_3__Solirubrobacterales;D_4__Solirubrobacteraceae;D_5__Solirubrobacteraceae_uncultured
OTU_5	D_0__Bacteria;D_1__Proteobacteria;D_2__Alphaproteobacteria;D_3__Rhizobiales;D_4__Methyloligellaceae;D_5__Methyloligellaceae_uncultured
OTU_603	D_0__Bacteria;D_1__Acidobacteriota;D_2__Acidobacteriae;D_3__Bryobacterales;D_4__Bryobacteraceae;D_5__Bryobacter
OTU_666	D_0__Bacteria;D_1__Bacteroidota;D_2__Bacteroidia;D_3__Chitinophagales;D_4__Chitinophagaceae;D_5__
OTU_705	D_0__Bacteria;D_1__Myxococcota;D_2__bacteriap25
OTU_727	D_0__Bacteria;D_1__Bacteroidota;D_2__Bacteroidia;D_3__Chitinophagales;D_4__Chitinophagaceae;D_5__Chitinophagaceae_uncultured
OTU_772	D_0__Bacteria;D_1__Actinobacteriota;D_2__Thermoleophilia;D_3__Solirubrobacterales;D_4__67-14
OTU_831	D_0__Bacteria;D_1__Actinobacteriota;D_2__Thermoleophilia;D_3__Gaiellales;D_4__Gaiellales_uncultured
OTU_923	D_0__Bacteria;D_1__Actinobacteriota;D_2__Acidimicrobiia;D_3__IMCC26256
OTUID	Glycyrrhiza enriched taxa
OTU_102	D_0__Bacteria;D_1__Acidobacteriota;D_2__Blastocatellia;D_3__Pyrinomonadales;D_4__Pyrinomonadaceae;D_5__RB41
OTU_1166	D_0__Bacteria;D_1__Bacteroidota;D_2__Bacteroidia;D_3__Cytophagales;D_4__Cyclobacteriaceae;D_5__Cyclobacteriaceae_uncultured
OTU_14	D_0__Bacteria;D_1__Acidobacteriota;D_2__Blastocatellia;D_3__Pyrinomonadales;D_4__Pyrinomonadaceae;D_5__RB41
OTU_154	D_0__Bacteria;D_1__Acidobacteriota;D_2__Blastocatellia;D_3__Pyrinomonadales;D_4__Pyrinomonadaceae;D_5__RB41
OTU_163	D_0__Bacteria;D_1__Acidobacteriota;D_2__Blastocatellia;D_3__Pyrinomonadales;D_4__Pyrinomonadaceae;D_5__RB41
OTU_173	D_0__Bacteria;D_1__Bacteroidota;D_2__Bacteroidia;D_3__Chitinophagales;D_4__Chitinophagaceae;D_5__Puia
OTU_182	D_0__Bacteria;D_1__Chloroflexi;D_2__Anaerolineae;D_3__Anaerolineales;D_4__Anaerolineaceae;D_5__Anaerolineaceae_uncultured
OTU_19	D_0__Bacteria;D_1__Bacteroidota;D_2__Bacteroidia;D_3__Chitinophagales;D_4__Chitinophagaceae;D_5__Chitinophagaceae_uncultured
OTU_196	D_0__Bacteria;D_1__Acidobacteriota;D_2__Blastocatellia;D_3__Pyrinomonadales;D_4__Pyrinomonadaceae;D_5__RB41
OTU_198	D_0__Bacteria;D_1__Chloroflexi;D_2__Anaerolineae;D_3__Ardenticatenales;D_4__Ardenticatenales_uncultured
OTU_22	D_0__Bacteria;D_1__Proteobacteria;D_2__Alphaproteobacteria;D_3__Rhizobiales;D_4__Rhizobiales_Incertae_Sedis;D_5__Nordella
OTU_277	D_0__Bacteria;D_1__Acidobacteriota;D_2__Blastocatellia;D_3__11-24
OTU_307	D_0__Bacteria;D_1__Actinobacteriota;D_2__Rubrobacteria;D_3__Rubrobacterales;D_4__Rubrobacteriaceae;D_5__Rubrobacter
OTU_312	D_0__Bacteria;D_1__Firmicutes;D_2__Bacilli;D_3__Bacillales;D_4__Bacillaceae;D_5__Bacillus
OTU_409	D_0__Bacteria;D_1__Acidobacteriota;D_2__Blastocatellia;D_3__11-24
OTU_421	D_0__Bacteria;D_1__Acidobacteriota;D_2__Vicinamibacteria;D_3__Vicinamibacterales;D_4__Vicinamibacterales_uncultured
OTU_437	D_0__Bacteria;D_1__Acidobacteriota;D_2__Blastocatellia;D_3__Pyrinomonadales;D_4__Pyrinomonadaceae;D_5__RB41
OTU_587	D_0__Bacteria;D_1__Firmicutes;D_2__Bacilli;D_3__Bacillales;D_4__Bacillaceae;D_5__Bacillus
OTU_659	D_0__Bacteria;D_1__Acidobacteriota;D_2__Vicinamibacteria;D_3__Vicinamibacterales;D_4__Vicinamibacteraceae
OTU_75	D_0__Bacteria;D_1__Proteobacteria;D_2__Alphaproteobacteria;D_3__Rhizobiales;D_4__Xanthobacteraceae;D_5__Bradyrhizobium
OTU_76	D_0__Bacteria;D_1__Firmicutes;D_2__Bacilli;D_3__Bacillales;D_4__Bacillaceae;D_5__Bacillus;D_6__Bacillus_megaterium
OTU_844	D_0__Bacteria;D_1__Acidobacteriota;D_2__Vicinamibacteria;D_3__Vicinamibacterales;D_4__Vicinamibacteraceae
OTU_849	D_0__Bacteria;D_1__Proteobacteria;D_2__Alphaproteobacteria;D_3__Rhizobiales;D_4__Rhizobiaceae;D_5__Allorhizobium-Neorhizobium-Pararhizobium-Rhizobium
OTUID	Pepper enriched taxa
OTU_107	D_0__Bacteria;D_1__Proteobacteria;D_2__Gammaproteobacteria;D_3__Burkholderiales;D_4__Comamonadaceae;D_5__Comamonadaceae_uncultured
OTU_11	D_0__Bacteria;D_1__Proteobacteria;D_2__Gammaproteobacteria;D_3__Burkholderiales;D_4__Nitrosomonadaceae;D_5__IS-44
OTU_111	D_0__Bacteria;D_1__Proteobacteria;D_2__Gammaproteobacteria;D_3__Xanthomonadales;D_4__Rhodanobacteraceae;D_5__Dokdonella
OTU_116	D_0__Bacteria;D_1__Acidobacteriota;D_2__Vicinamibacteria;D_3__Vicinamibacterales;D_4__Vicinamibacterales_uncultured
OTU_118	D_0__Bacteria;D_1__Acidobacteriota;D_2__Vicinamibacteria;D_3__Vicinamibacterales;D_4__Vicinamibacteraceae;D_5__Vicinamibacteraceae_uncultured
OTU_124	D_0__Bacteria;D_1__Acidobacteriota;D_2__Vicinamibacteria;D_3__Vicinamibacterales;D_4__Vicinamibacterales_uncultured
OTU_135	D_0__Bacteria;D_1__Myxococcota;D_2__Polyangia;D_3__Nannocystales;D_4__Nannocystaceae;D_5__Nannocystis;D_6__Nannocystis_exedens
OTU_136	D_0__Bacteria;D_1__Bacteroidota;D_2__Bacteroidia;D_3__Chitinophagales;D_4__Chitinophagaceae;D_5__Chitinophagaceae_uncultured
OTU_1391	D_0__Bacteria;D_1__Proteobacteria;D_2__Alphaproteobacteria;D_3__Sphingomonadales;D_4__Sphingomonadaceae;D_5__Sphingobium;D_6__Sphingobium_chlorophenolicum
OTU_150	D_0__Bacteria;D_1__Proteobacteria;D_2__Gammaproteobacteria;D_3__PLTA13
OTU_1600	D_0__Bacteria;D_1__Nitrospirota;D_2__Nitrospiria;D_3__Nitrospirales;D_4__Nitrospiraceae;D_5__Nitrospira
OTU_1646	D_0__Bacteria;D_1__Acidobacteriota;D_2__Vicinamibacteria;D_3__Vicinamibacterales;D_4__Vicinamibacteraceae
OTU_172	D_0__Bacteria;D_1__Bacteroidota;D_2__Bacteroidia;D_3__Chitinophagales;D_4__Chitinophagaceae;D_5__Chitinophagaceae_uncultured
OTU_18	D_0__Bacteria;D_1__Bacteroidota;D_2__Bacteroidia;D_3__Chitinophagales;D_4__Chitinophagaceae;D_5__Terrimonas
OTU_188	D_0__Bacteria;D_1__Proteobacteria;D_2__Alphaproteobacteria;D_3__Alphaproteobacteria_uncultured
OTU_199	D_0__Bacteria;D_1__Proteobacteria;D_2__Gammaproteobacteria;D_3__Xanthomonadales;D_4__Xanthomonadaceae;D_5__Arenimonas
OTU_204	D_0__Bacteria;D_1__Acidobacteriota;D_2__Blastocatellia;D_3__11-24
OTU_223	D_0__Bacteria;D_1__Gemmatimonadota;D_2__Gemmatimonadetes;D_3__Gemmatimonadales;D_4__Gemmatimonadaceae;D_5__Gemmatimonadaceae_uncultured
OTU_32	D_0__Bacteria;D_1__Acidobacteriota;D_2__Holophagae;D_3__Subgroup_7
OTU_333	D_0__Bacteria;D_1__Acidobacteriota;D_2__Holophagae;D_3__Subgroup_7
OTU_34	D_0__Bacteria;D_1__Bacteroidota;D_2__Bacteroidia;D_3__Chitinophagales;D_4__Chitinophagaceae;D_5__Flavisolibacter
OTU_35	D_0__Bacteria;D_1__Proteobacteria;D_2__Gammaproteobacteria;D_3__Burkholderiales;D_4__Nitrosomonadaceae;D_5__Ellin6067
OTU_366	D_0__Bacteria;D_1__Proteobacteria;D_2__Gammaproteobacteria;D_3__Burkholderiales;D_4__Oxalobacteraceae;D_5__Massilia
OTU_38	D_0__Bacteria;D_1__Acidobacteriota;D_2__Vicinamibacteria;D_3__Vicinamibacterales;D_4__Vicinamibacteraceae
OTU_397	D_0__Bacteria;D_1__Bacteroidota;D_2__Bacteroidia;D_3__Chitinophagales;D_4__Chitinophagaceae;D_5__Terrimonas
OTU_413	D_0__Bacteria;D_1__Myxococcota;D_2__Polyangia;D_3__Nannocystales;D_4__Nannocystaceae
OTU_447	D_0__Bacteria;D_1__Proteobacteria;D_2__Gammaproteobacteria;D_3__Xanthomonadales;D_4__Rhodanobacteraceae;D_5__Rhodanobacteraceae_uncultured
OTU_45	D_0__Bacteria;D_1__Acidobacteriota;D_2__Holophagae;D_3__Subgroup_7
OTU_451	D_0__Bacteria;D_1__Proteobacteria;D_2__Gammaproteobacteria;D_3__Burkholderiales;D_4__Oxalobacteraceae;D_5__Massilia
OTU_464	D_0__Bacteria;D_1__Proteobacteria;D_2__Alphaproteobacteria;D_3__Caulobacterales;D_4__Hyphomonadaceae;D_5__SWB02
OTU_467	D_0__Bacteria;D_1__Myxococcota;D_2__Polyangia;D_3__Haliangiales;D_4__Haliangiaceae;D_5__Haliangium
OTU_47	D_0__Bacteria;D_1__Acidobacteriota;D_2__Blastocatellia;D_3__Blastocatellales;D_4__Blastocatellaceae;D_5__Blastocatellaceae_uncultured
OTU_520	D_0__Bacteria;D_1__Desulfobacterota;D_2__Desulfobacterota_uncultured
OTU_54	D_0__Bacteria;D_1__Nitrospirota;D_2__Nitrospiria;D_3__Nitrospirales;D_4__Nitrospiraceae;D_5__Nitrospira
OTU_577	D_0__Bacteria;D_1__Proteobacteria;D_2__Gammaproteobacteria;D_3__Xanthomonadales;D_4__Xanthomonadaceae;D_5__Luteimonas
OTU_58	D_0__Bacteria;D_1__Proteobacteria;D_2__Gammaproteobacteria;D_3__Burkholderiales;D_4__Nitrosomonadaceae;D_5__Nitrosospira
OTU_62	D_0__Bacteria;D_1__Bacteroidota;D_2__Bacteroidia;D_3__Chitinophagales;D_4__Saprospiraceae;D_5__Saprospiraceae_uncultured
OTU_645	D_0__Bacteria;D_1__Acidobacteriota;D_2__Vicinamibacteria;D_3__Vicinamibacterales;D_4__Vicinamibacteraceae
OTU_66	D_0__Bacteria;D_1__Acidobacteriota;D_2__Vicinamibacteria;D_3__Vicinamibacterales;D_4__Vicinamibacteraceae
OTU_71	D_0__Bacteria;D_1__Proteobacteria;D_2__Gammaproteobacteria;D_3__Xanthomonadales;D_4__Xanthomonadaceae;D_5__Lysobacter
OTU_711	D_0__Bacteria;D_1__Proteobacteria;D_2__Gammaproteobacteria;D_3__Burkholderiales;D_4__Methylophilaceae;D_5__MM2
OTU_826	D_0__Bacteria;D_1__Myxococcota;D_2__Polyangia;D_3__Polyangiales;D_4__BIrii41
OTU_84	D_0__Bacteria;D_1__Acidobacteriota;D_2__Blastocatellia;D_3__Blastocatellales;D_4__Blastocatellaceae;D_5__Stenotrophobacter
OTU_85	D_0__Bacteria;D_1__Proteobacteria;D_2__Gammaproteobacteria;D_3__Gammaproteobacteria_Incertae_Sedis;D_5__Acidibacter
OTU_9	D_0__Bacteria;D_1__Proteobacteria;D_2__Gammaproteobacteria;D_3__Burkholderiales;D_4__Nitrosomonadaceae;D_5__Ellin6067
OTU_94	D_0__Bacteria;D_1__Bacteroidota;D_2__Bacteroidia;D_3__Chitinophagales;D_4__Chitinophagaceae;D_5__Niastella;D_6__Niastella_populi
OTU_95	D_0__Bacteria;D_1__Acidobacteriota;D_2__Vicinamibacteria;D_3__Vicinamibacterales;D_4__Vicinamibacterales_uncultured
OTU_971	D_0__Bacteria;D_1__Gemmatimonadota;D_2__Gemmatimonadetes;D_3__Gemmatimonadales;D_4__Gemmatimonadaceae;D_5__Gemmatimonadaceae_uncultured
OTU_988	D_0__Bacteria;D_1__Armatimonadota;D_2__Fimbriimonadia;D_3__Fimbriimonadales;D_4__Fimbriimonadaceae

## Sheet: Table S6
adonis analysis	Df	SumsOfSqs	MeanSqs	F.Model	R2	Pr
TOC	1	0.7108	0.71081	2.4268	0.04818	0.001	***
Ammonium	1	0.4271	0.4271	1.4582	0.02895	0.029	*
Nitrate	1	0.6315	0.63147	2.1559	0.0428	0.001	***
AP	1	0.4941	0.49407	1.6868	0.03349	0.012	*
AK	1	0.6231	0.62305	2.1272	0.04223	0.001	***
Organic	1	0.4266	0.42657	1.4564	0.02891	0.022	*
MBC	1	0.5778	0.57784	1.9728	0.03917	0.001	***
MBN	1	0.3187	0.31868	1.088	0.0216	0.279
Residuals	36	10.5443	0.2929	0.71468
Total	44	14.7539	1
Number of permutations: 999
Model: rda(formula = otu ~ TOC + Ammonium + Nitrate + AP + AK + Organic + MBC + MBN, data = env)
Df Variance F Pr(>F)
Model 8 0.19005 1.4698 0.001 ***
Residual 36 0.58186
Mantel Test	Mantel statistic r	Significance
TOC	0.1219	0.081
Ammonium	0.1354	0.042	*
Nitrate	0.2666	0.001	***
AP	0.1613	0.013	**
AK	0.1717	0.001	***
Organic	0.1301	0.072	*
MBC	0.3546	0.001	***
MBN	0.1519	0.016	**

## Sheet: Table S7
Network	Apple	Intercropping	SWS
num.edges	10449	4654	5517
num.pos.edges	8489	3743	4431
num.neg.edges	1960	911	1086
num.vertices	871	621	290
connectance	0.0275783	0.0241754	0.131655
average.degree	23.9931	14.9887	38.0483
average.path.length	3.72726	3.89291	2.65076
diameter	12	15	8
edge.connectivity	0	0	0
clustering.coefficient	0.485328	0.389994	0.641684
no.clusters	25	19	3
centralization.degree	0.150583	0.108083	0.266269
centralization.betweenness	0.0201296	0.027561	0.0260168
centralization.closeness	0.00267804	0.00389054	0.0305795

## Sheet: Table S8
OTUID	Group	Keystone species
OTUs75	Root soil of apple	Bradyrhizobium
OTUs1473	Root soil of apple	Vicinamibacterales_uncultured
OTUs110	Root soil of apple	Rhizobiales_uncultured
OTUs240	Root soil of apple	MB-A2-108
OTUs63	Root soil of apple	Pir4_lineage
OTUs307	Root soil of apple	Rubrobacter
OTUs176	Root soil of apple	Gemmatimonadaceae_uncultured
OTUs952	Root soil of apple	wb1-P19
OTUs163	Root soil of apple	RB41
OTUs921	Root soil of apple	Vicinamibacterales_uncultured
OTUs794	Root soil of apple	Vicinamibacteraceae_uncultured
OTUs293	Root soil of apple	Vicinamibacteraceae_uncultured
OTUs45	Root soil of apple	Subgroup_7
OTUs4	Root soil of apple	Vicinamibacteraceae_uncultured
OTUs796	Root soil of apple	Vicinamibacteraceae_uncultured
OTUs325	Root soil of apple	Vicinamibacterales_uncultured
OTUs563	Root soil of apple	Vicinamibacteraceae_uncultured
OTUs437	Root soil of apple	RB41
OTUs84	Root soil of intercropping plants	Stenotrophobacter
OTUs530	Root soil of intercropping plants	Vicinamibacteraceae_uncultured
OTUs557	Root soil of intercropping plants	Chitinophaga
OTUs921	Root soil of intercropping plants	Vicinamibacterales_uncultured
OTUs584	Root soil of intercropping plants	Polyangiaceae_uncultured
OTUs93	Root soil of intercropping plants	Bacillus
OTUs1652	Root soil of intercropping plants	Vicinamibacteraceae_uncultured
OTUs307	Root soil of intercropping plants	Rubrobacter
OTUs654	Root soil of intercropping plants	Rhizobiales_uncultured
OTUs409	Root soil of intercropping plants	Blastocatellia_uncultured
OTUs1563	Root soil of intercropping plants	Ardenticatenales_uncultured
OTUs458	Root soil of intercropping plants	Actinomarinales_uncultured
OTUs577	Root soil of intercropping plants	Luteimonas
OTUs464	Root soil of intercropping plants	SWB02
OTUs869	Root soil of intercropping plants	Chitinophagaceae_uncultured

## Sheet: Sheet2
Metabolic	A1R1	A1R2	A1R3	A1R4	A1R5	A2R1	A2R2	A2R3	A2R4	A2R5	A3R1	A3R2	A3R3	A3R4	A3R5	B1R1	B1R2	B1R3	B1R4	B1R5	B2R1	B2R2	B2R3	B2R4	B2R5	B3R1	B3R2	B3R3	B3R4	B3R5	C1R1	C1R2	C1R3	C1R4	C1R5	C2R1	C2R2	C2R3	C2R4	C2R5	C3R1	C3R2	C3R3	C3R4	C3R5	All
(2S)-Liquiritigenin	1.51826e+07	1.52475e+07	1.45509e+07	1.615e+07	1.85785e+07	5.87817e+07	3.90897e+07	4.49632e+07	4.04228e+07	3.97374e+07	1.46415e+06	168299	1.48361e+06	858905	1.31411e+06	3.96818e+06	1.98331e+06	4.23676e+06	1.63446e+06	1.49795e+06	254262	806004	237309	1.5909e+06	245157	1.44224e+06	107038	805689	433382	224885	1.00375e+07	4.25602e+07	7.37728e+07	2.00721e+07	1.49674e+07	1.65753e+06	1.39444e+06	6.45653e+06	2.22412e+06	108577	229613	92339.5	658899	962574	217020	1.11749e+07
(S)-1-Phenylethanol	5.37513e+07	6.98378e+07	7.08341e+07	5.52207e+07	5.7491e+07	8.42897e+07	8.27062e+07	9.23969e+07	9.2781e+07	8.78937e+07	2.96576e+07	4.82538e+06	1.37754e+07	1.3375e+07	1.46542e+07	5.47491e+07	5.88647e+07	1.61263e+07	5.1084e+07	6.25681e+07	1.66806e+07	1.4465e+07	1.61515e+07	6.66721e+06	2.26701e+07	1.50921e+07	1.63501e+07	5424033	1.35644e+07	1.39552e+07	1.40286e+08	1.61043e+08	166409544	1.50283e+08	1.68694e+08	7.42137e+07	8.24917e+07	6.75012e+07	7.86811e+07	7.41784e+07	3.1718e+07	3.24593e+07	3.20934e+07	2.97657e+07	3.30883e+07	5.62402e+07
1H-Indole-3-carboxaldehyde	2.0166e+06	2.00195e+06	1.90621e+06	1.92781e+06	1.93031e+06	2.53536e+06	2.10243e+06	2.14832e+06	2.06376e+06	1.99929e+06	2.28773e+06	1.97704e+06	1.94477e+06	1.93585e+06	1.882e+06	2.61595e+06	2.76932e+06	2.74803e+06	2.58205e+06	2.83979e+06	1.85875e+06	2.06099e+06	1.88531e+06	2.1331e+06	2.05432e+06	2.23653e+06	2.46076e+06	1.93021e+06	2.02991e+06	2.18816e+06	2.27515e+06	2.79892e+06	2.60434e+06	2.48922e+06	2.8337e+06	2.71517e+06	3.07552e+06	3.23871e+06	2.9668e+06	3.07662e+06	2.02261e+06	2.22004e+06	2.25428e+06	2.01445e+06	2.32666e+06	2.31033e+06
1-Kestose	624652	664085	699828	702357	775982	745862	577018	803975	753767	629435	450776	352244	406357	467935	509993	1.9635e+06	2.91959e+06	2.11097e+06	1.26908e+06	2.38344e+06	640382	686816	870842	694781	659596	458685	461357	489334	389236	479955	742484	895684	729976	874201	894848	931996	1.03084e+06	916108	976183	1.11289e+06	66031.9	74860.2	76766.5	84407.9	92558.4	780926
2-Amino-3-phosphonopropionic acid	2.54434e+06	4.67883e+06	4.78317e+06	3.95087e+06	3.49248e+06	3.0496e+06	1.99839e+06	1.96652e+06	1.76588e+06	4.14267e+06	3.10249e+06	2.49151e+06	5.96743e+06	7.05308e+06	9.07383e+06	3.28712e+06	5.43339e+06	3.62098e+06	3.50268e+06	3.58522e+06	9.14826e+06	8.961e+06	7.50048e+06	9.45069e+06	8.95095e+06	5.32204e+06	9.09925e+06	4.18838e+06	9.67067e+06	9.6225e+06	1.01525e+07	9.25027e+06	9.82883e+06	1.00316e+07	9.68814e+06	1.00244e+07	1.05229e+07	1.00993e+07	1.01767e+07	9.89182e+06	1.06219e+07	1.14351e+07	1.20076e+07	1.17809e+07	1.13572e+07	7.07275e+06
2-Aminobenzoic acid	1.54297e+07	9.55726e+06	1.07204e+07	1.56906e+07	1.40193e+07	1.33877e+07	1.46142e+07	1.75279e+07	1.57332e+07	1.60685e+07	1.51622e+07	1.45521e+07	1.21155e+07	1.1303e+07	2.00402e+07	9.84865e+06	8.81735e+06	6.75033e+06	7.94031e+06	7.25618e+06	1.53806e+07	9.29832e+06	1.0623e+07	9.91422e+06	1.59886e+07	1.10797e+07	1.06878e+07	1.75998e+07	1.75079e+07	1.08994e+07	1.09433e+07	2.08364e+07	1.56703e+07	1.5089e+07	2.70475e+07	1.78885e+07	2.99892e+07	21395781	3.74903e+07	2.45299e+07	2.68692e+07	3.86622e+07	3.86953e+07	5.35417e+07	8.66761e+07	1.89075e+07
2-Pyrocatechuic acid	3.04125e+06	1.53316e+06	3.83958e+06	3.5433e+06	3.63055e+06	1.56454e+06	4.18944e+06	5.67415e+06	3.893e+06	2.80358e+06	3.33475e+06	2.52046e+06	1.22286e+06	2.83941e+06	2.15171e+06	2.73045e+06	3151121	3.10775e+06	2.97157e+06	2.48551e+06	2.70263e+06	2.33368e+06	2.47499e+06	1.99314e+06	1.93751e+06	1.70581e+06	1.68667e+06	1.67798e+06	1.45977e+06	1.35098e+06	1.59562e+06	1.6352e+06	662459	1.42379e+06	1.28851e+06	1.63263e+06	1.35933e+06	1.24549e+06	1.16879e+06	1.0681e+06	978304	964689	838293	961912	821426	2.15991e+06
3-Butynoate	1.28086e+07	1.33605e+07	2.48109e+07	7.03677e+06	1.97819e+07	2.62175e+07	1.72009e+07	4.75999e+07	2.51908e+07	1.19433e+07	1.18913e+07	2.94324e+07	2.05237e+07	1.06935e+07	1.20521e+07	1.79156e+07	1.83481e+07	1.59745e+07	1.64498e+07	1.39215e+07	5.58584e+06	5.20589e+06	1.94458e+07	1.44241e+07	1.21271e+07	1.41034e+07	1.11774e+07	8.48687e+06	1.12211e+07	3.72939e+06	3.4455e+06	1.03312e+07	7.53439e+06	6.01151e+06	2.65247e+06	6.08048e+06	7.76574e+06	6.41514e+06	6.09698e+06	1.99621e+06	2.12666e+06	2.23904e+06	4.9103e+06	2.80184e+06	1.9518e+06	1.22449e+07
3-Dehydroshikimate	5.61871e+07	5.90809e+07	7.08541e+07	6.65572e+07	6.29667e+07	7.4394e+07	7.38998e+07	7.63285e+07	6.80279e+07	6.8734e+07	17299899	1.6353e+07	6.74736e+07	1.45572e+07	1.23357e+07	1.2868e+07	5.55567e+07	5.28398e+07	1.44831e+07	6.11361e+07	5.95536e+07	6.50112e+07	6.37984e+07	5.9099e+07	1.30953e+07	1.32922e+07	6.10339e+07	5.54826e+07	1.20244e+07	1.30574e+07	1.16078e+07	5.8471e+07	5.35775e+07	1.05207e+07	5.67384e+07	1.18261e+07	1.2113e+07	1.18064e+07	5.11655e+07	1.02155e+07	4.96338e+07	9.89924e+06	5.01813e+07	1.00729e+07	1.01936e+07	4.07868e+07
3-Hydroxybenzyl alcohol glucoside	4.52513e+07	1.45759e+07	2.06971e+07	2.1183e+07	1.33401e+07	1.70439e+07	9.32288e+07	1.93477e+07	1.49316e+07	9.69131e+07	9.60359e+06	9.66073e+07	1.80303e+07	4.34605e+07	1.67086e+08	8.89727e+07	4.69811e+07	7.92734e+07	5.86654e+07	4.47453e+07	2.46518e+08	2.59966e+08	268487649	2.53658e+08	2.23655e+08	7.84276e+07	1.98224e+08	2.24109e+08	1.89903e+08	1.76594e+08	2.18669e+08	1.76565e+08	1.56605e+08	1.58669e+08	1.56929e+08	1.59769e+08	1.14043e+08	4.293e+07	1.36858e+08	124670377	1.26091e+08	9.78467e+07	1.07894e+08	9.04233e+07	1.06301e+08	1.13416e+08
3-Hydroxyphenylacetic acid	9.88537e+06	1.22881e+07	1.6923e+07	1.13089e+07	1.65448e+07	1.70166e+07	3.96191e+06	3.87305e+06	1.98142e+06	9.35455e+06	1.44621e+07	1.4396e+07	7.56355e+06	9.55061e+06	5.74027e+06	9.39185e+06	6.05485e+06	2.22344e+06	1.97789e+06	1.75996e+06	8.96177e+06	1.52448e+06	3.86145e+06	2.13763e+06	921902	847609	804768	795753	778362	746036	3.88219e+06	4.70282e+06	775133	4.01175e+06	3.65023e+06	1.92902e+06	849167	4.8193e+06	942367	1.01423e+06	1.12179e+06	1.22875e+06	2.65568e+06	1.6445e+06	8.89485e+06	5.328e+06
4-Hydroxycinnamic acid	9.14718e+06	1.68121e+07	1.3195e+06	4.44149e+06	2.24954e+06	1.03025e+06	961019	940186	2.61688e+06	4.99247e+06	6.51574e+06	6.45426e+06	4.21306e+06	3.87027e+06	4.78121e+06	4.3787e+07	7.54263e+06	8.3495e+06	4.98244e+07	1.09161e+07	5.60393e+07	3.52581e+07	1.5952e+07	6.86165e+07	5.8592e+07	4.63996e+07	1.06323e+08	1.12084e+08	3.64413e+07	4.51601e+08	3.16953e+08	484290360	3.93371e+07	1.34354e+08	8.81021e+07	2.43679e+07	7.91596e+07	1.86068e+07	1.91269e+07	6.59464e+07	3.93681e+07	3.43185e+07	8.50999e+06	3.39379e+07	3.66656e+07	5.78026e+07
4-Hydroxyphenylacetaldehyde	777533	634998	2.07372e+06	492273	485684	1.75909e+06	3.125e+06	1.33956e+06	1.8778e+06	1.70864e+06	459972	511799	589888	687792	1.12579e+06	4.04429e+06	6.17836e+06	5.47233e+06	5.58671e+06	7.89785e+06	2.01124e+06	1.95241e+06	2.0127e+06	1.75519e+07	2.3071e+06	2.02251e+06	2.24441e+06	2.03187e+06	2.26887e+06	2.43788e+06	2.13549e+07	1.02886e+07	1.15025e+07	2.05414e+07	2.22963e+07	2.46925e+07	1.43093e+07	1.07153e+07	1.65623e+07	1.48414e+07	2.25614e+06	2.19535e+06	6.08244e+06	2.29551e+06	2.24777e+06	5.90781e+06
9,10-Epoxyoctadecenoic acid	1.18885e+07	6.38551e+06	9.45854e+06	5.90505e+06	6.11571e+06	7.74262e+06	5.97794e+06	6.71727e+06	7.31482e+06	7.42018e+06	4.3886e+06	6.56063e+06	4.05948e+06	4.82758e+06	5.1704e+06	1.54513e+07	1.13244e+07	1.64036e+07	9.58418e+06	1.55546e+07	7.21772e+06	1.22495e+07	7.09914e+06	1.4876e+07	5.33492e+06	6.1045e+06	6.25038e+06	7.21079e+06	6.85032e+06	6.52674e+06	8.86204e+06	1.43534e+07	2.62781e+07	1.39128e+07	1.51301e+07	1.13155e+07	1.47537e+07	1.72479e+07	2.04216e+07	1.50507e+07	3.95703e+06	5.26983e+06	4.48605e+06	9.56594e+06	4.73696e+06	9.62917e+06
Acetylcysteine	2.45057e+07	3.24713e+07	4.53084e+07	1.06922e+08	9.1319e+07	7.87896e+07	8.8821e+07	8.3435e+07	8.33257e+07	5.2678e+07	7.1407e+07	4.32421e+07	3.23295e+07	2.84676e+07	2.02606e+07	1.05259e+07	1.35892e+07	1.566e+07	9.38104e+06	1.03158e+07	3.96508e+07	1.95035e+07	1.3829e+07	3.25664e+07	1.36765e+07	1.85861e+07	1.09546e+07	9.44134e+06	1.18284e+07	1.3536e+07	8.61357e+06	1.01461e+07	1.45634e+07	2.04638e+07	7.35679e+06	7.00376e+06	9.34056e+06	6.21308e+06	5.09895e+06	6.02278e+06	5.79882e+06	8.32838e+06	6.28215e+06	5.1888e+06	3.75738e+06	2.7789e+07
Allantoin	1.03211e+07	1.18455e+07	2.01123e+07	2.05609e+07	2.76888e+07	3.125e+07	2.24061e+07	3.03275e+07	3.19685e+07	5.96829e+07	3.62324e+07	1.71388e+07	2.81555e+07	4.76564e+06	2.27849e+07	1.04911e+07	8.41328e+06	9.28381e+06	8.96808e+06	2.253e+06	1.56315e+07	9.50248e+06	7.91161e+06	8.77381e+06	1.04038e+07	1.05828e+07	1.11949e+07	8.99235e+06	8.81288e+06	7.13616e+06	8.48592e+06	2.01797e+06	6.65874e+06	7.57011e+06	7.8952e+06	9.81142e+06	8.16986e+06	6.90257e+06	6.93514e+06	6.53255e+06	1.78654e+06	9.17842e+06	1.15574e+07	7.05974e+06	5.481e+06	1.37697e+07
Betaine	6.14408e+06	7.36611e+06	3.75385e+06	4.60632e+06	4.14748e+06	4.33587e+06	3.13445e+06	4.50551e+06	3.84075e+06	2.87211e+06	514145	598292	664691	3.20897e+06	4.90025e+06	5.98602e+07	8.71117e+07	7.76455e+07	6.95539e+07	7.191e+07	2.46232e+07	2.34475e+07	2.93938e+07	2.34055e+07	2.58185e+07	7.5838e+06	2.54246e+07	7.4757e+06	7.16456e+06	8.97783e+06	4.87906e+07	6.1531e+07	6.98388e+07	4.90316e+07	5.85214e+07	1.30511e+07	1.8857e+07	1.42908e+07	1.21034e+07	1.40184e+07	6.56079e+06	6.73825e+06	620876	5.36067e+06	645483	2.18655e+07
Chalconaringenin	439870	715617	1.05919e+06	461080	368919	316407	323326	347984	376065	973654	2.34404e+06	671355	468996	564573	610067	282645	355734	444803	416741	681099	399491	379382	262040	358257	206893	215697	240349	212200	191073	155198	47748.4	69050	86370.2	59725.5	65141.3	47165.7	54247.3	44155	50425.6	44948.9	44553.8	40101.4	39764.2	47777.9	34427.9	347074
Chavicol	4.73146e+06	4.01149e+06	4.51252e+06	3.8075e+06	853240	3.16674e+06	2.68082e+06	3.75885e+06	2.93063e+06	2.30488e+06	5.42075e+06	3.49445e+06	3.70585e+06	4.30626e+06	3.49008e+06	4.51405e+06	4.00678e+06	5.5399e+06	1.1913e+06	5.63323e+06	7.19383e+06	6.49239e+06	5.85431e+06	7.95598e+06	7.66186e+06	1.08218e+07	7.05784e+06	6.98154e+06	1.1942e+06	6.09331e+06	4.47639e+06	4.05593e+06	5.53455e+06	4.92089e+06	3.68543e+06	6.68317e+06	4.68918e+06	4.95137e+06	5.98172e+06	3.27924e+06	6.26055e+06	5.64253e+06	3.42391e+06	5.26914e+06	5.05873e+06	4.78401e+06
Creatinine	5.50228e+06	4.01215e+06	1.40866e+07	1.08397e+07	2.10932e+07	1.19329e+07	4.67419e+06	7.64146e+06	3.14544e+06	3.13565e+06	1.03477e+07	5.21324e+06	1.07404e+07	7.00307e+06	1.28339e+07	8.03468e+07	7.24221e+07	7.75513e+07	5.22763e+07	4.97339e+07	8.13397e+07	1.36915e+08	2.05463e+08	7.78671e+07	7.64315e+07	3.67049e+07	1.50804e+08	3.6508e+07	2.62077e+08	5.29105e+07	6.16642e+07	2.55414e+08	210353319	1.76371e+08	3.83024e+08	9.62285e+07	244017906	5.75412e+08	9.89391e+07	1459024801	4.86449e+08	1.12789e+08	9.85001e+07	1004237640	8.98699e+07	1.54086e+08
Cyclohexylamine	2.01285e+06	2.65802e+06	2.3178e+06	2.33969e+06	2.02396e+06	1.7443e+06	1.92746e+06	1.91325e+06	1.70539e+06	2.07985e+06	8.5823e+06	2.36782e+06	9.88624e+06	2.16703e+07	2.38602e+06	4.63552e+06	6.12062e+06	5.86426e+06	1.27802e+06	5.42186e+06	895399	775512	2.43518e+06	3.12301e+06	5.44089e+06	1.47386e+06	429421	848538	1.24355e+06	1.23423e+06	845579	722749	1.70408e+06	3.05553e+06	609940	531836	174499	967649	152595	1.02181e+06	131095	315494	429377	405962	407147	2.62912e+06
Cytidine	9.24228e+06	7.95753e+06	7.33942e+06	7.67905e+06	7.12819e+06	6.77238e+06	6.36668e+06	8.63175e+06	6.77428e+06	7.02667e+06	1.50547e+06	1.58879e+06	1.89828e+06	2.1984e+06	2.30092e+06	1.64818e+07	1.92412e+07	1.8571e+07	1.78157e+07	1.80107e+07	1.79359e+07	1.74826e+07	1.79802e+07	1.81256e+07	1.65574e+07	3.30129e+06	2.87116e+06	3.19497e+06	1.50635e+07	2.87687e+06	1.32113e+07	1.50543e+07	1.33404e+07	1.33959e+07	1.39075e+07	1.35566e+07	1.24986e+07	1.33993e+07	1.14251e+07	1.19552e+07	9.59437e+06	9.51647e+06	2.01836e+06	9.0549e+06	9.11475e+06	1.02436e+07
D-Alanyl-D-serine	793827	1.11141e+06	526386	579867	371941	687505	1.3129e+06	1.86214e+06	544860	1.27753e+06	290801	326359	269138	452664	682660	2.5178e+07	3.0611e+07	2.72153e+07	2.49574e+07	3.0959e+07	4.20262e+06	1.3671e+06	5.67945e+06	5.10615e+06	1.50648e+06	1.01682e+06	2.41167e+06	903569	847390	937961	8.05449e+06	1.81649e+07	1.87963e+07	1.75525e+07	1.43703e+07	4.89088e+06	6.04896e+06	6.12045e+06	6.17721e+06	5.96343e+06	466172	426318	251280	522656	486520	6.27294e+06
Dimethyl sulfone	3.49573e+06	3.50977e+06	3.11766e+06	4.17019e+06	3.26913e+06	2.36826e+06	1.88939e+06	3.06569e+06	2.03954e+06	2.28378e+06	107046	75248.2	80977.2	85040.8	90695.3	6.77031e+06	9.02893e+06	1.03444e+07	9.148e+06	1.01613e+07	3.26008e+06	5.75255e+06	3.90596e+06	2.98102e+06	2.55361e+06	347174	193492	235502	244857	287245	4.69926e+06	5.37622e+06	4.43566e+06	5.34499e+06	8.29077e+06	3.30109e+06	2.98323e+06	3.35375e+06	4.34526e+06	4.09968e+06	190660	240944	234369	198977	255786	3.16029e+06
D-Ribose	9.02019e+07	1.17843e+08	1.16293e+08	8.99159e+07	9.06754e+07	1.345e+08	1.38802e+08	1.55112e+08	149531694	1.51808e+08	4.99886e+07	2.40339e+07	2.37009e+07	2.53804e+07	2.73281e+07	1.01553e+08	1.06901e+08	9.70733e+07	9.64418e+07	1.19125e+08	2.93841e+07	2.66636e+07	3.12177e+07	3.3732e+07	4.20986e+07	2.44801e+07	4.47556e+07	2.75111e+07	2.58348e+07	2.58545e+07	2.83616e+08	3.28621e+08	3.36109e+08	293649891	331232303	1.39915e+08	1.55893e+08	1.32859e+08	1.57107e+08	1.44492e+08	6.22216e+07	6.03988e+07	6.27901e+07	6.03538e+07	5.73675e+07	1.07208e+08
D-Sorbose	1.00332e+07	5.92675e+07	4.60664e+07	1.06501e+07	3.99713e+07	1.33937e+08	1.1874e+07	6.14871e+07	9.17746e+07	4.75815e+07	6.8324e+07	1.14872e+07	1.12003e+07	2.93334e+07	1.0155e+07	4.37821e+07	2.19619e+07	1.66378e+07	6.78472e+06	6.15412e+06	5.83313e+06	1.26982e+07	1.10134e+07	2.60133e+06	1.94592e+07	3.25114e+06	3.14142e+06	9.11573e+06	2.86338e+06	7.19135e+06	6.90847e+06	7.60218e+06	1.39919e+07	7.79379e+06	2.39795e+06	1.17621e+06	5.42383e+06	6.86421e+06	7.76452e+06	2.40369e+06	9.57851e+06	2.49961e+06	2.4752e+06	2.52651e+06	2.62044e+06	1.9948e+07
Fumaric acid	1.38102e+07	1.69521e+07	1.91856e+07	1.45513e+07	1.65799e+07	2.55991e+07	2.86067e+07	2.95631e+07	2.74363e+07	3.15614e+07	2.34374e+07	1.2767e+07	9.39642e+06	8.91152e+06	9.24879e+06	5.5401e+06	5.52623e+06	4.91643e+06	5.52419e+06	5.8573e+06	4.07276e+06	4.77738e+06	4.75815e+06	3.83595e+06	6.54535e+06	3.62718e+06	3.96754e+06	3.97069e+06	3.76446e+06	3.81213e+06	2.05728e+07	2.13424e+07	2.49571e+07	2.10127e+07	2.2151e+07	1.79021e+07	2.09767e+07	2.08248e+07	2.21523e+07	2.17583e+07	3.29761e+07	3.40886e+07	3.71107e+07	3.61451e+07	3.55202e+07	1.66132e+07
Genistein	9.76534e+06	9.06842e+06	9.01606e+06	8.10829e+06	7.00654e+06	8.70826e+06	6.89232e+06	8.0484e+06	7.84042e+06	8.74681e+06	6.99677e+06	6.79539e+06	9.5705e+06	9.94882e+06	8.94789e+06	9.96253e+06	1.04886e+07	1.03541e+07	1.0456e+07	1.18859e+07	1.08417e+07	9.68253e+06	1.14544e+07	1.10067e+07	1.06574e+07	1.01911e+07	1.13342e+07	1.21085e+07	1.14258e+07	1.1284e+07	1.25691e+07	1.166e+07	1.25137e+07	1.15098e+07	1.47677e+07	1.21754e+07	1.41864e+07	1.44053e+07	1.37846e+07	1.18348e+07	1.40197e+07	1.20727e+07	1.27556e+07	1.34879e+07	1.59254e+07	1.08058e+07
Glyceraldehyde	9.49477e+07	2.18443e+07	1.16122e+08	9.61937e+07	1.38846e+08	4.54905e+07	1.58998e+07	2.56566e+07	2.0824e+07	5.78408e+06	4.85274e+06	1.3333e+07	3.09064e+07	7.32291e+06	2.36204e+07	2.61052e+06	2.38651e+06	1.1548e+07	2.00316e+07	2.39267e+06	2.76149e+06	1.59689e+07	1.75426e+07	1.31469e+07	2.99816e+06	3.66784e+06	3.83943e+06	2.18383e+07	4.5251e+06	5.95617e+06	5.25029e+07	4.75553e+07	8.93164e+07	1759.79	1759.79	1759.79	1759.79	1759.79	1759.79	1759.79	1759.79	1759.79	1759.79	1759.79	1759.79	2.18278e+07
Heptanoic acid	1759.79	1759.79	1759.79	1759.79	1759.79	1759.79	1759.79	1759.79	1759.79	1759.79	1759.79	1759.79	1759.79	1759.79	4.79036e+07	1.05575e+07	3.82091e+06	5.32303e+06	1.38141e+06	4.0341e+06	1.22141e+06	6.32894e+06	1.22908e+06	7.33333e+06	4.18609e+06	7.31958e+06	2.84913e+07	1.48528e+06	1.47714e+06	7.32702e+06	1.56816e+06	9.67687e+06	10062827	1.16754e+07	8.52267e+06	9.9346e+06	6.52501e+06	4.7811e+07	1.05186e+07	1.20439e+07	2.00871e+07	2.85791e+07	2.3612e+07	8.99319e+06	4.85968e+07	8.8367e+06
Hydroquinone	1147535354	1070133667	1648498582	2111355371	3134655569	4655750968	5861106409	6423460433	6008273156	4547925962	3392078275	2380941260	1777745130	1340504974	1187382907	8.83084e+08	8.69719e+08	9.19015e+08	901824608	8.59241e+08	9.19416e+08	8.40455e+08	947111139	9.16255e+08	8.85139e+08	8.8676e+08	9.21233e+08	810779564	8.91986e+08	8.23712e+08	8.39307e+08	7.95172e+08	7.008e+08	6.85e+08	7.26456e+08	6.64811e+08	6.58099e+08	6.65299e+08	6.5483e+08	5.92731e+08	6.13588e+08	5.67663e+08	5.71468e+08	5.44589e+08	5.70438e+08	1.55141e+09
Indican	1.61288e+06	5.96323e+06	5.83453e+06	5.59024e+06	7.41462e+06	1.30218e+06	1.45036e+06	1.31411e+06	1.63791e+06	1.48049e+06	1.1633e+06	934549	973365	949070	767212	1.26507e+07	1.30292e+07	1.31508e+07	1.11027e+07	1.41428e+07	1.14844e+07	9.7404e+06	1.17263e+07	1.02085e+07	8.91025e+06	4.07024e+06	5.30206e+06	4.65531e+06	4.57663e+06	4.50205e+06	9.30775e+06	9.46554e+06	1.01556e+07	8.08482e+06	9.13149e+06	7.35491e+06	7.82437e+06	6.65815e+06	7.1998e+06	7.01627e+06	1.07408e+06	916402	2.06648e+06	2.51741e+06	2.50046e+06	5.97587e+06
Isoliquiritigenin	2.41914e+06	2.31347e+06	2.26067e+06	2.48927e+06	2.93777e+06	9.44864e+06	6.1347e+06	6.87212e+06	6.36648e+06	6.40044e+06	18235.2	14945.3	14367.7	18833.5	16546.2	240717	24168.3	24618.9	16258	26485.5	11193.8	14182.1	11689.6	8470.39	6789.79	9106.58	10631.3	11765.1	17272.7	10455	1.55408e+06	6.75281e+06	1.15886e+07	3.1123e+06	2.3106e+06	24678.7	124790	24473	113173	119987	9012.85	10260	6680.22	8046.09	4444.85	1.64296e+06
Isopimaric acid	8.85631e+06	5.66716e+06	893560	827104	2.29112e+06	722863	1.95969e+06	625973	503823	474656	1.05459e+06	446698	996981	911375	524070	563824	449065	1.29897e+06	2.32051e+06	1.0122e+06	445650	488902	1.76787e+06	1.29952e+06	1.75057e+06	1.06836e+07	4.03881e+06	3.79733e+06	1.84282e+06	4.15535e+06	2.26806e+06	2.49628e+08	1.52272e+06	7.3936e+06	3.17235e+06	1.67658e+06	1.18856e+07	7.694e+06	9.99502e+06	1.30334e+07	4.82326e+06	277664	495513	325904	417951	8.38401e+06
Labetalol	348609	467793	305664	234668	405901	396128	256506	450265	336110	877117	408857	67846.3	562027	507149	580576	496745	634590	379516	897111	505897	691462	749747	857806	1.43233e+06	1.08566e+06	2.1595e+06	1.15494e+06	1.99198e+06	1.83852e+06	2.17758e+06	8.42262e+06	1.1733e+06	1.9488e+06	1.17345e+06	1.40547e+06	1.69188e+06	3.41284e+06	1.17859e+06	880124	956739	540464	871973	587837	594995	464812	1.07917e+06
Maleic acid	510362340	3.68523e+08	5.6535e+08	5.10814e+08	5.6794e+08	6.28734e+08	6.1855e+08	5.81485e+08	6.21328e+08	6.03857e+08	6.02051e+08	5.72652e+08	5.56883e+08	5.27137e+08	484127876	5.60193e+08	4.64258e+08	4.90491e+08	6.32336e+08	4.6939e+08	5.3261e+08	4.68385e+08	5.22429e+08	5.12415e+08	4.75524e+08	5.10895e+08	4.73729e+08	4.38983e+08	4.51135e+08	3.86346e+08	4.10045e+08	4.1192e+08	337350738	3.30692e+08	3.44393e+08	3.22768e+08	2.82973e+08	3.04138e+08	2.8667e+08	2.64427e+08	2.54438e+08	2.34526e+08	2.27109e+08	2.2147e+08	2.32721e+08	4.48323e+08
Maleimide	5.54908e+07	6.5625e+07	7.83262e+07	5.74684e+07	5.88539e+07	1.00068e+08	1.0853e+08	1.0973e+08	1.01032e+08	1.22186e+08	8.9648e+07	4.4317e+07	3.98487e+07	3.67028e+07	4.07088e+07	2.31614e+07	2.30199e+07	2.43533e+07	2.2326e+07	2.38182e+07	1.56965e+07	2.87284e+06	2.31178e+07	3.57281e+06	2.74442e+07	3.48646e+06	2.59735e+07	1.78758e+07	1.79104e+07	1.76689e+07	8.43318e+07	9.14402e+07	1.03769e+08	8.7436e+07	94179056	7.22166e+07	7.9556e+07	7.97335e+07	8.43765e+07	9.2194e+07	1.18638e+08	1.37723e+08	1.2666e+08	128809485	1.26861e+08	6.41946e+07
Mannitol	1.06347e+06	1.22063e+06	909135	687790	907968	679578	568316	885161	841336	769793	453651	381550	306583	360786	423374	1.10893e+07	1.15058e+07	1.27057e+07	1.0684e+07	1.31409e+07	953787	933035	1.40931e+06	1.16869e+06	1.14427e+06	359355	384096	342306	421525	355742	2.91592e+06	2.81748e+06	4.21844e+06	2.34043e+06	2.01588e+06	737904	738907	837167	814531	992482	545029	496986	676215	1.22649e+06	611510	2.20094e+06
Melibiose	7.44976e+06	7.37782e+06	7.76912e+06	7.98398e+06	7.74289e+06	8.09119e+06	7.80028e+06	7.87164e+06	9.00194e+06	7.32829e+06	5.19745e+06	5.33004e+06	4.60549e+06	5.31834e+06	6.4428e+06	2.68732e+07	4.37563e+07	2.87199e+07	2.64723e+07	3.46186e+07	1.17719e+07	1.04925e+07	1.2742e+07	1.42222e+07	1.16929e+07	7.70811e+06	8.75167e+06	8.37786e+06	8.01141e+06	6.94246e+06	1.2154e+07	1.20217e+07	1.42578e+07	1.06249e+07	1.13235e+07	9.69691e+06	9.29017e+06	9.38731e+06	1.02145e+07	1.00327e+07	1.13921e+06	925722	1.05196e+06	1.01093e+06	1.08379e+06	1.06818e+07
Mesaconate	1.89453e+07	2.30105e+07	2.38202e+07	1.8633e+07	1.75478e+07	2.67495e+07	2.84216e+07	3.22977e+07	2.87244e+07	7.47914e+06	9.52508e+06	4.54299e+06	4.73521e+06	4.33497e+06	5.35915e+06	2.21048e+07	2.34128e+07	2.14694e+07	2.13262e+07	2.50616e+07	6.37346e+06	1.83379e+06	2.04357e+06	7.3975e+06	8.39966e+06	5.14501e+06	5.47227e+06	1.9363e+06	5.10588e+06	1.77694e+06	5.68041e+07	6.83617e+07	7.0135e+07	5.71497e+07	6.00159e+07	2.7812e+07	3.07787e+07	2.56303e+07	2.91901e+07	2.61501e+07	1.18323e+07	1.09888e+07	1.16075e+07	1.06801e+07	1.10953e+07	2.04715e+07
N-Formyl-L-methionine	3.78327e+06	4.24444e+06	4.96254e+06	5.50637e+06	5.34312e+06	7.42798e+06	7.21577e+06	8.25756e+06	8.37882e+06	6.93065e+06	7.19633e+06	7.50283e+06	6.64897e+06	6.3875e+06	4.58912e+06	4.49148e+06	2.98756e+06	4.6399e+06	2.84279e+06	2.88807e+06	4.662e+06	4.86089e+06	5.38123e+06	4.93807e+06	4.85353e+06	1.10346e+07	6.08859e+06	6.29283e+06	6.22657e+06	5.79137e+06	5.60681e+06	5.71221e+06	5.4775e+06	5.57422e+06	5.49572e+06	8.95121e+06	6.1785e+06	8.01707e+06	8.01176e+06	8.17957e+06	1.07416e+07	8.91382e+06	1.14726e+07	1.34124e+07	1.12704e+07	6.56378e+06
N-Methylethanolaminium phosphate	2.78841e+06	1.08372e+07	1.38943e+07	1.37073e+07	1.47232e+07	2.04807e+07	1.82071e+07	2.16291e+07	1.24849e+07	9.32264e+06	1.04761e+07	4.53903e+06	3.33642e+06	2.78649e+06	2.05102e+06	2.08697e+06	1.7478e+06	1.80868e+06	1.49684e+06	1.77134e+06	1.67618e+06	1.80917e+06	1.62215e+06	1.53469e+06	1.53007e+06	1.5712e+06	1.30658e+06	1.70996e+06	1.64723e+06	1.66063e+06	1.91957e+06	2.08533e+06	2.1023e+06	1.97154e+06	2.56529e+06	2.4671e+06	2.55618e+06	2.74876e+06	2.83714e+06	3.43965e+06	5.7346e+06	6.89011e+06	8.29794e+06	1.04576e+07	1.42744e+07	5.70202e+06
Oxoglutaric acid	2.48853e+07	3.38615e+07	3.05808e+07	2.48728e+07	2.59205e+07	3.82891e+07	3.77555e+07	4.19337e+07	4.01302e+07	3.91628e+07	1.32909e+07	6.54226e+06	6.19018e+06	6.95849e+06	6.64666e+06	2.70703e+07	2.92194e+07	3.02443e+07	2.55501e+07	3.42662e+07	8.57561e+06	7.43258e+06	8.83119e+06	8.92269e+06	1.07409e+07	6.90663e+06	1.03567e+07	7.69686e+06	6.94362e+06	6.64179e+06	6.57344e+07	7.60973e+07	7.71689e+07	6.99237e+07	7.60313e+07	3.36181e+07	3.67884e+07	3.06626e+07	3.66215e+07	3.153e+07	1.48284e+07	1.3159e+07	1.31913e+07	1.28789e+07	1.18874e+07	2.6812e+07
Pelargonic acid	8.55765e+07	8.38572e+07	7.79054e+07	7.55067e+07	7.65021e+07	8.14267e+07	7.30986e+07	7.89389e+07	8.13877e+07	7.70349e+07	8.17064e+07	7.67642e+07	8.12144e+07	8.48126e+07	8.51434e+07	8.30618e+07	9.00243e+07	8.55697e+07	8.74469e+07	8.86759e+07	1.13769e+08	9.22192e+07	9.30593e+07	9.4809e+07	1.08141e+08	8.76803e+07	115473772	115248583	1.08118e+08	9.58018e+07	1.01179e+08	1.03447e+08	1.06426e+08	9.98092e+07	1.13695e+08	9.63411e+07	9.47923e+07	9.34393e+07	9.3616e+07	9.37975e+07	9.4925e+07	8.70938e+07	1.12189e+08	1.12787e+08	1.0299e+08	9.25889e+07
Phenyl acetate	1.34591e+07	1.30613e+07	1.10353e+07	1.01791e+07	1.00243e+07	4.07046e+06	3.6239e+06	7.13013e+06	3.82903e+06	4.09756e+06	20598.7	21796	113384	85290.8	98978.8	3.26132e+07	4.45104e+07	3.91918e+07	5.62431e+07	3.66291e+07	1.41468e+07	1.99387e+07	3.28825e+07	2.4825e+07	1.16198e+07	284046	39920.4	212230	176225	161763	3.22202e+07	3.82749e+07	3.6498e+07	2.7749e+07	4.07453e+07	9.97565e+06	8.05652e+06	8.50196e+06	1.39561e+07	1.33692e+07	331688	436087	478840	426696	454415	1.39067e+07
Phloretin	2.30453e+08	2.68667e+08	3.9538e+08	2.27621e+08	3.45007e+08	515090	290251	960666	284541	349494	166879	99962.9	81490.6	76241.3	107481	2.9203e+08	4.82171e+08	3.1651e+08	3.17111e+08	3.79409e+08	2.10661e+06	2.34281e+06	1.87852e+06	2.37577e+06	1.82397e+06	2.33716e+07	304116	454670	582712	542056	9.57418e+07	1.71431e+08	2.35622e+08	3.02841e+08	1.77338e+08	782462	1.37828e+06	1.26803e+06	911340	928796	66952.1	72690.6	100028	59792.4	101640	9.51493e+07
Phytosphingosine	7.58747e+06	1.04338e+07	10470512	1.108e+07	1.55564e+07	1.6674e+07	2.52084e+07	2.96471e+07	3.61791e+07	4.00735e+07	4.23359e+07	3.99738e+07	3.87134e+07	3.70884e+07	3.00994e+07	2.42758e+07	2.53949e+07	2.57241e+07	2.49902e+07	2.32425e+07	2.18394e+07	1.71413e+07	2.16445e+07	1.80283e+07	1.69231e+07	3.22527e+06	1.00305e+07	9.18773e+06	9.17717e+06	8.40237e+06	6.67957e+06	7.14717e+06	6.99229e+06	6.47176e+06	5.49669e+06	4.83677e+06	3.97074e+06	3.54357e+06	3.35951e+06	3.06729e+06	2.66243e+06	2.07834e+06	2.25514e+06	1.68936e+06	1.60204e+06	1.58267e+07
Prostaglandin F2a	1.34821e+06	476280	424238	1.31749e+06	461780	172185	101108	1.28598e+06	582014	92327.3	1.60044e+06	1.80361e+06	28507.2	2.65878e+06	52554.1	1.04116e+08	1.10088e+08	1.20155e+08	1.06696e+08	1.62222e+08	5.14687e+06	6.00969e+06	1.09228e+07	6.89987e+06	7.0474e+06	364723	6.01746e+06	5.68579e+06	5.33327e+06	71408.8	3.44146e+07	4.79451e+07	3.92124e+07	4.25357e+07	3.24663e+07	5.19499e+06	5.53667e+06	7.62735e+06	5.48935e+06	6.20591e+06	1.94381e+06	1.8079e+06	27132.3	25033.1	33176.4	1.99922e+07
Putrescine	1.1376e+08	7.0429e+07	6.52732e+07	4.82671e+07	6.40595e+06	1.70013e+07	2.1691e+07	1.50102e+07	4.29005e+06	1.4721e+07	6.42399e+06	1.16309e+07	1.39395e+07	6.69197e+06	4.21701e+06	7.05046e+06	1.63434e+06	4.35629e+06	4.86119e+06	1.36811e+06	1.4927e+06	5.99363e+06	6.01467e+06	1.33681e+07	1.25137e+07	4.37414e+06	1.93552e+06	2.04583e+06	1.95341e+06	1.41681e+07	5.00516e+06	2.96792e+07	3.03695e+07	1759.79	1759.79	1759.79	1759.79	1759.79	1759.79	1759.79	1759.79	1759.79	1759.79	1759.79	1759.79	1.26213e+07
Pyrrole-2-carboxylic acid	3.34407e+07	1.49557e+07	1.91679e+07	4.19479e+06	6.73119e+06	1.88447e+06	7.51203e+06	6.31491e+06	3.36283e+06	2.77067e+06	2.67054e+06	2.51746e+06	1.27125e+06	2.31024e+06	2.82034e+06	1.14227e+06	1.38015e+06	2.9681e+06	1.5609e+06	3.11297e+06	3.77413e+06	4.31668e+06	1.15636e+06	1.9801e+07	6.92139e+06	4.12023e+06	4.69021e+06	1.57492e+06	1.86726e+06	1.41614e+07	4.0591e+06	4.08576e+06	5.87908e+06	2.87496e+07	1759.79	1759.79	1759.79	1759.79	1759.79	1759.79	1759.79	1759.79	1759.79	1759.79	1759.79	5.05035e+06
S-Hexyl-glutathione	1.51913e+06	1.20086e+06	320916	965886	912282	1.10347e+06	889982	892649	817039	1.03075e+06	983021	953418	985620	1.07636e+06	1.42214e+06	1.48179e+06	1.81681e+06	1.879e+06	1.9264e+06	1.83966e+06	1.93486e+06	1.97312e+06	2.1497e+06	2.06378e+06	2.01273e+06	1.45473e+06	1.93896e+06	1.9111e+06	1.69979e+06	1.78177e+06	1.82322e+06	2.1646e+06	1.87559e+06	2.52964e+06	2.05128e+06	1.38631e+06	1.87834e+06	2.15125e+06	1.6056e+06	1.84027e+06	1.7863e+06	1.91643e+06	1.84759e+06	1.62512e+06	1.53528e+06	1.57677e+06
Succinic acid	2.17584e+07	2.37748e+07	2.6117e+07	2.00019e+07	2.17178e+07	3.02563e+07	2.96563e+07	3.5272e+07	3.29221e+07	3.27878e+07	1.0547e+07	5.84192e+06	5.88715e+06	5.78128e+06	6.41416e+06	2.31033e+07	2.37687e+07	2.31615e+07	2.19799e+07	2.6467e+07	6.8689e+06	6.52655e+06	7.40486e+06	7.50985e+06	9.8585e+06	6.16002e+06	5.69986e+06	6.78442e+06	6.39649e+06	6.1408e+06	5.70082e+07	6.22584e+07	6.41947e+07	5.61917e+07	5.60289e+07	2.8906e+07	3.10675e+07	2.72602e+07	3.14872e+07	2.84733e+07	1.12651e+07	1.11785e+07	1.27479e+07	1.0579e+07	1.17002e+07	2.21536e+07
Sulfate	9.04348e+06	6.84983e+06	2.64456e+06	5.9786e+06	2.38737e+06	3.0078e+06	2.31716e+06	2.14978e+06	7.13787e+06	3.48201e+06	2.72763e+06	2.3251e+06	3.00415e+06	2.21761e+06	2.11606e+06	3.37491e+06	3.09941e+06	3.47361e+06	3.26638e+06	6.77683e+06	3.93581e+06	3.88673e+06	5.62128e+06	3.45722e+06	4.92463e+06	4.53653e+06	7.28603e+06	6.11615e+06	5.05715e+06	5.6748e+06	6.18726e+06	5.78489e+06	9.95631e+06	9.38141e+06	8.30934e+06	1.56588e+07	1.44402e+07	1.56233e+07	4.48375e+07	4.07041e+07	103195394	1759.79	1759.79	1759.79	1759.79	8.93249e+06
trans-trans-Muconic acid	1.73869e+08	6.35391e+07	4.66741e+07	1.11674e+08	1.75223e+07	1.38586e+08	2.0418e+08	1.82988e+08	2.41038e+07	3.92275e+07	8.52514e+06	3.72003e+07	1.36611e+07	2.36663e+07	1.69744e+07	8.16371e+06	7.03582e+06	3.56322e+06	1.74652e+07	3.28037e+07	9.35564e+06	2.8832e+07	3.08751e+07	4.85439e+06	7.73583e+07	1.51107e+07	5.10695e+07	5.44918e+07	1.08542e+07	4.98031e+07	1759.79	1759.79	1759.79	1759.79	1759.79	1759.79	1759.79	1759.79	1759.79	1759.79	1759.79	1759.79	1759.79	1759.79	1759.79	3.34234e+07

## Sheet: Table S9
genera correlaion level	Var1	Var2	cor	pvalue
61368	Dokdonella	1H-Indole-3-carboxaldehyde	0.743924	2.96022e-10
16568	Ensifer	1-Hydroxy-2-naphthoate	-0.715312	1.03667e-08
59748	Arenimonas	1-Kestose	0.791399	1.03667e-08
59738	Dokdonella	1-Kestose	0.743634	2.38136e-10
59957	Hydrogenophaga	1-Kestose	0.701602	2.21728e-08
59742	IS-44	1-Kestose	0.770465	2.38136e-10
59728	JGI_0001001-H03	1-Kestose	0.778138	1.27047e-08
59757	Pedomicrobium	1-Kestose	0.721082	6.38158e-12
59761	Reyranellaceae_uncultured	1-Kestose	0.792265	6.38158e-12
59719	Rhodanobacteraceae_uncultured	1-Kestose	0.779398	1.03667e-08
59689	Saprospiraceae_uncultured	1-Kestose	0.802321	2.38136e-10
59678	Terrimonas	1-Kestose	0.830808	2.96022e-10
59750	Vicinamibacteraceae_uncultured	1-Kestose	0.759855	2.21728e-08
59830	Xylophilus	1-Kestose	0.739083	4.14924e-09
39501	MND1	2-Amino-3-phosphonopropionic acid	-0.729022	1.04394e-08
57974	Nannocystaceae_uncultured	4-Hydroxybenzaldehyde	-0.704248	9.87831e-09
40730	Fictibacillus	4-Hydroxyphenylacetaldehyde	-0.708252	1.27047e-08
40462	Luteimonas	4-Hydroxyphenylacetaldehyde	0.700867	5.69078e-08
40741	Methylococcaceae_uncultured	4-Hydroxyphenylacetaldehyde	-0.73589	2.21728e-08
40468	Paenibacillus	4-Hydroxyphenylacetaldehyde	-0.755072	2.38136e-10
40470	Roseisolibacter	4-Hydroxyphenylacetaldehyde	-0.702207	2.21728e-08
21312	Tumebacillus	5-Hydroxymethyluracil	-0.748105	8.61832e-10
57130	Dokdonella	9,10-Epoxyoctadecenoic acid	0.742621	6.38158e-12
57153	Reyranellaceae_uncultured	9,10-Epoxyoctadecenoic acid	0.787673	2.21728e-08
57111	Rhodanobacteraceae_uncultured	9,10-Epoxyoctadecenoic acid	0.723529	2.38136e-10
14073	MND1	Acetylcysteine	0.723026	4.14924e-09
14137	Nordella	Acetylcysteine	0.710449	8.61832e-10
14075	Puia	Acetylcysteine	0.867542	1.70012e-08
15985	Bacillus	Betaine	-0.720211	5.69078e-08
16018	Paenibacillus	Betaine	-0.715902	2.96022e-10
61669	MND1	Chalconaringenin	0.779099	2.96022e-10
27765	MND1	Cholesterol	0.718743	6.39651e-09
27829	Nordella	Cholesterol	0.783603	1.27047e-08
27713	RB41	Cholesterol	0.704944	1.04394e-08
46	Roseisolibacter	Creatinine	-0.700307	1.70012e-08
42021	OLB13	D-Alanyl-D-serine	0.703242	6.38158e-12
41831	Reyranellaceae_uncultured	D-Alanyl-D-serine	0.775313	5.69078e-08
41930	UTBCD1	D-Alanyl-D-serine	0.720742	1.03667e-08
16745	Nordella	Deoxycholic acid	-0.724157	2.96022e-10
45235	Achromobacter	Dimethyl sulfone	0.71558	6.38158e-12
45078	Arenimonas	Dimethyl sulfone	0.801502	1.27047e-08
45003	Blastocatellaceae_uncultured	Dimethyl sulfone	0.731651	2.96022e-10
45136	Comamonas	Dimethyl sulfone	0.70032	5.69078e-08
45037	Ellin6067	Dimethyl sulfone	0.754406	9.87831e-09
45072	IS-44	Dimethyl sulfone	0.824728	8.61832e-10
45058	JGI_0001001-H03	Dimethyl sulfone	0.772189	1.03667e-08
45087	Pedomicrobium	Dimethyl sulfone	0.725499	2.38136e-10
45091	Reyranellaceae_uncultured	Dimethyl sulfone	0.819887	2.96022e-10
45172	Rhizobiales_Incertae_Sedis_uncultured	Dimethyl sulfone	0.756235	6.38158e-12
45049	Rhodanobacteraceae_uncultured	Dimethyl sulfone	0.726831	2.96022e-10
45019	Saprospiraceae_uncultured	Dimethyl sulfone	0.751755	6.38158e-12
45147	Sphingopyxis	Dimethyl sulfone	0.739255	1.27047e-08
45008	Terrimonas	Dimethyl sulfone	0.801621	2.38136e-10
45080	Vicinamibacteraceae_uncultured	Dimethyl sulfone	0.72182	5.69078e-08
45160	Xylophilus	Dimethyl sulfone	0.725439	6.39651e-09
29821	Planomicrobium	Dimethyl trisulfide	-0.707153	8.61832e-10
29851	Romboutsia	Dimethyl trisulfide	-0.700036	1.27047e-08
29846	Turicibacter	Dimethyl trisulfide	-0.707064	8.61832e-10
12468	Dokdonella	D-Ribose	0.713304	2.21728e-08
12472	IS-44	D-Ribose	0.717217	6.38158e-12
12491	Reyranellaceae_uncultured	D-Ribose	0.746543	1.03667e-08
12449	Rhodanobacteraceae_uncultured	D-Ribose	0.736142	9.87831e-09
12554	Solirubrobacteraceae_uncultured	D-Ribose	-0.704526	1.03667e-08
41524	Tumebacillus	gamma-Glutamyl-beta-aminopropiononitrile	-0.713915	6.38158e-12
20844	Fictibacillus	Genistein	-0.704115	5.69078e-08
20593	MND1	Genistein	-0.775937	1.70012e-08
20657	Nordella	Genistein	-0.776156	1.03667e-08
20595	Puia	Genistein	-0.75183	1.03667e-08
20584	Roseisolibacter	Genistein	-0.732203	5.69078e-08
7430	Bradyrhizobium	Hydroquinone	0.708457	9.87831e-09
7227	MND1	Hydroquinone	0.80651	8.61832e-10
7291	Nordella	Hydroquinone	0.766797	9.87831e-09
7229	Puia	Hydroquinone	0.795609	2.21728e-08
7175	RB41	Hydroquinone	0.70758	6.38158e-12
7218	Roseisolibacter	Hydroquinone	0.736818	1.04394e-08
7211	Rubrobacter	Hydroquinone	0.7053	6.39651e-09
7347	wb1-P19	Hydroquinone	0.703825	1.70012e-08
40872	Tumebacillus	Hypotaurine	-0.703286	2.38136e-10
56655	Belnapia	Isoliquiritigenin	-0.713619	6.38158e-12
10551	Nordella	Isovaleric acid	0.783208	1.03667e-08
35917	Puia	L-2,4-diaminobutyric acid	-0.719643	1.27047e-08
59125	Nordella	Labetalol	-0.731539	2.38136e-10
8205	MND1	Maleic acid	0.735743	6.38158e-12
26822	Arenimonas	Mannitol	0.707896	2.96022e-10
26816	IS-44	Mannitol	0.730901	6.38158e-12
26750	Novosphingobium	Mannitol	0.704301	5.69078e-08
26831	Pedomicrobium	Mannitol	0.717192	9.87831e-09
26835	Reyranellaceae_uncultured	Mannitol	0.746948	1.27047e-08
37574	IS-44	Mesaconate	0.71742	2.38136e-10
37593	Reyranellaceae_uncultured	Mesaconate	0.746476	9.87831e-09
37551	Rhodanobacteraceae_uncultured	Mesaconate	0.729472	8.61832e-10
37656	Solirubrobacteraceae_uncultured	Mesaconate	-0.730602	2.96022e-10
13159	Nordella	myo-Inositol	-0.734438	6.38158e-12
22271	Reyranellaceae_uncultured	Oxoglutaric acid	0.707372	2.96022e-10
22334	Solirubrobacteraceae_uncultured	Oxoglutaric acid	-0.716409	9.87831e-09
52255	Acidibacter	Phenyl acetate	0.7032	2.38136e-10
52250	Arenimonas	Phenyl acetate	0.756138	9.87831e-09
52175	Blastocatellaceae_uncultured	Phenyl acetate	0.71149	2.38136e-10
52209	Ellin6067	Phenyl acetate	0.732202	8.61832e-10
52244	IS-44	Phenyl acetate	0.775274	2.96022e-10
52259	Pedomicrobium	Phenyl acetate	0.761035	2.96022e-10
52263	Reyranellaceae_uncultured	Phenyl acetate	0.795169	2.38136e-10
52191	Saprospiraceae_uncultured	Phenyl acetate	0.714375	4.14924e-09
52180	Terrimonas	Phenyl acetate	0.748781	5.69078e-08
52252	Vicinamibacteraceae_uncultured	Phenyl acetate	0.719117	1.27047e-08
52332	Xylophilus	Phenyl acetate	0.705995	1.04394e-08
55184	Arenimonas	Phloretin	0.740347	8.61832e-10
55109	Blastocatellaceae_uncultured	Phloretin	0.749572	8.61832e-10
55164	JGI_0001001-H03	Phloretin	0.751764	9.87831e-09
55193	Pedomicrobium	Phloretin	0.70717	8.61832e-10
55295	Pseudomonas	Phloretin	0.704533	9.87831e-09
55278	Rhizobiales_Incertae_Sedis_uncultured	Phloretin	0.721455	8.61832e-10
55114	Terrimonas	Phloretin	0.752075	6.38158e-12
55266	Xylophilus	Phloretin	0.780345	3.51118e-09
31677	MND1	Phytosphingosine	0.748394	2.38136e-10
31625	RB41	Phytosphingosine	0.713575	2.38136e-10
26088	Chitinophagaceae_uncultured	Prostaglandin F2a	-0.73001	1.03667e-08
26282	UTBCD1	Prostaglandin F2a	0.708999	9.87831e-09
3969	Puia	Putrescine	0.736716	5.69078e-08
37900	IS-44	Succinic acid	0.706987	1.70012e-08
37919	Reyranellaceae_uncultured	Succinic acid	0.734927	8.61832e-10
37982	Solirubrobacteraceae_uncultured	Succinic acid	-0.728157	8.61832e-10
30224	Clostridium_sensu_stricto_1	trans-trans-Muconic acid	-0.702951	1.27047e-08
30172	Turicibacter	trans-trans-Muconic acid	-0.721165	2.96022e-10

[truncated: 1 more sheets: Table S10]
